# Supplementary material for: Transcriptome analysis and identification of genes associated with fruiting branch internode elongation in upland cotton
Source: BMC Plant Biol. 2019 Oct 7;19:415. doi: 10.1186/s12870-019-2011-8 (PMC6781417; doi:10.1186/s12870-019-2011-8)
Supplement: Supplementary file 5 — List of genes associated with various aspects of hormone homeostasis. (XLS 1631 kb) [file 12870_2019_2011_MOESM5_ESM.xls]

## Sheet: Sheet1
id	X-1-1_fpkm	X-1-2_fpkm	X-1-3_fpkm	X-2-1_fpkm	X-2-2_fpkm	X-2-3_fpkm	X-3-1_fpkm	X-3-2_fpkm	X-3-3_fpkm	L-1-1_fpkm	L-1-2_fpkm	L-1-3_fpkm	L-2-1_fpkm	L-2-2_fpkm	L-2-3_fpkm	L-3-1_fpkm	L-3-2_fpkm	L-3-3_fpkm	X-1-1_count	X-1-2_count	X-1-3_count	X-2-1_count	X-2-2_count	X-2-3_count	X-3-1_count	X-3-2_count	X-3-3_count	L-1-1_count	L-1-2_count	L-1-3_count	L-2-1_count	L-2-2_count	L-2-3_count	L-3-1_count	L-3-2_count	L-3-3_count	Symbol	Query_id	Description	KEGG_A_class	KEGG_B_class	Pathway	GO Component	GO Function	GO Process
Gh_A04G0856	0	0	0.16	0.15	0	0.15	0	0	0	0.41	0.17	0.37	0.3	0.08	0.45	0.15	0.22	0	0	0	2	2	0	2	0	0	0	6	2	5	5	1	5	2	3	0	Gh_A04G0856	Gh_A04G0856	Transcription factor PIF3 [Source:UniProtKB/Swiss-Prot;Acc:O80536]	Organismal Systems;Environmental Information Processing	Signal transduction;Environmental adaptation	ko04075//Plant hormone signal transduction;ko04712//Circadian rhythm - plant	GO:0043229//intracellular organelle;GO:0005623//cell;GO:0043226//organelle;GO:0043231//intracellular membrane-bounded organelle;GO:0043227//membrane-bounded organelle;GO:0044424//intracellular part;GO:0044464//cell part;GO:0005622//intracellular;GO:0005634//nucleus	GO:0042802//identical protein binding;GO:1901363//heterocyclic compound binding;GO:0097159//organic cyclic compound binding;GO:0003700//sequence-specific DNA binding transcription factor activity;GO:0005488//binding;GO:0003676//nucleic acid binding;GO:0046983//protein dimerization activity;GO:0001071//nucleic acid binding transcription factor activity;GO:0005515//protein binding;GO:0003677//DNA b…	GO:0009704//de-etiolation;GO:0090304//nucleic acid metabolic process;GO:0007602//phototransduction;GO:0070887//cellular response to chemical stimulus;GO:0009639//response to red or far red light;GO:0009628//response to abiotic stimulus;GO:0007154//cell communication;GO:0051716//cellular response to stimulus;GO:0019222//regulation of metabolic process;GO:0044260//cellular macromolecule metabolic p…
Gh_A07G1202	111.28	101.81	87.9	70.18	93.94	84.03	84.36	86.55	85.37	92.75	76.04	88.51	63.49	80.86	67.37	47.27	75.17	33.63	2712.48	2556.56	1925.87	1603.84	2747.84	1965.87	2203.72	1797.12	1900.48	2330.53	1514.93	2082.09	1797.73	1694.12	1284.34	1115.21	1786.95	743.57	Gh_A07G1202	Gh_A07G1202	Transcription factor PIF3 [Source:UniProtKB/Swiss-Prot;Acc:O80536]	Organismal Systems;Environmental Information Processing	Signal transduction;Environmental adaptation	ko04075//Plant hormone signal transduction;ko04712//Circadian rhythm - plant	GO:0043229//intracellular organelle;GO:0005623//cell;GO:0043226//organelle;GO:0043231//intracellular membrane-bounded organelle;GO:0043227//membrane-bounded organelle;GO:0044424//intracellular part;GO:0044464//cell part;GO:0005622//intracellular;GO:0005634//nucleus	GO:0042802//identical protein binding;GO:1901363//heterocyclic compound binding;GO:0097159//organic cyclic compound binding;GO:0003700//sequence-specific DNA binding transcription factor activity;GO:0005488//binding;GO:0003676//nucleic acid binding;GO:0046983//protein dimerization activity;GO:0001071//nucleic acid binding transcription factor activity;GO:0005515//protein binding;GO:0003677//DNA b…	GO:0009704//de-etiolation;GO:0090304//nucleic acid metabolic process;GO:0007602//phototransduction;GO:0070887//cellular response to chemical stimulus;GO:0009639//response to red or far red light;GO:0009628//response to abiotic stimulus;GO:0007154//cell communication;GO:0051716//cellular response to stimulus;GO:0019222//regulation of metabolic process;GO:0044260//cellular macromolecule metabolic p…
Gh_A11G2494	4.81	4.17	4.78	3.42	4.03	3.52	2.81	3.43	2.2	4.53	4.7	5.05	3.5	3.77	3.52	4.02	3.44	2.43	168	150	150	112	169	118	105	102	70	163	134	170	142	113	96	136	117	77	Gh_A11G2494	Gh_A11G2494	Transcription factor PIF3 [Source:UniProtKB/Swiss-Prot;Acc:O80536]	Organismal Systems;Environmental Information Processing	Signal transduction;Environmental adaptation	ko04075//Plant hormone signal transduction;ko04712//Circadian rhythm - plant	GO:0043229//intracellular organelle;GO:0005623//cell;GO:0043226//organelle;GO:0043231//intracellular membrane-bounded organelle;GO:0043227//membrane-bounded organelle;GO:0044424//intracellular part;GO:0044464//cell part;GO:0005622//intracellular;GO:0005634//nucleus	GO:0042802//identical protein binding;GO:1901363//heterocyclic compound binding;GO:0097159//organic cyclic compound binding;GO:0003700//sequence-specific DNA binding transcription factor activity;GO:0005488//binding;GO:0003676//nucleic acid binding;GO:0046983//protein dimerization activity;GO:0001071//nucleic acid binding transcription factor activity;GO:0005515//protein binding;GO:0003677//DNA b…	GO:0009704//de-etiolation;GO:0090304//nucleic acid metabolic process;GO:0007602//phototransduction;GO:0070887//cellular response to chemical stimulus;GO:0009639//response to red or far red light;GO:0009628//response to abiotic stimulus;GO:0007154//cell communication;GO:0051716//cellular response to stimulus;GO:0019222//regulation of metabolic process;GO:0044260//cellular macromolecule metabolic p…
Gh_D04G1354	0	0.06	0	0.06	0	0	0.05	0	0	0.06	0	0.12	0.05	0.07	0	0	0	0	0	1	0	1	0	0	1	0	0	1	0	2	1	1	0	0	0	0	Gh_D04G1354	Gh_D04G1354	Transcription factor PIF3 [Source:UniProtKB/Swiss-Prot;Acc:O80536]	Organismal Systems;Environmental Information Processing	Signal transduction;Environmental adaptation	ko04075//Plant hormone signal transduction;ko04712//Circadian rhythm - plant	GO:0043229//intracellular organelle;GO:0005623//cell;GO:0043226//organelle;GO:0043231//intracellular membrane-bounded organelle;GO:0043227//membrane-bounded organelle;GO:0044424//intracellular part;GO:0044464//cell part;GO:0005622//intracellular;GO:0005634//nucleus	GO:0042802//identical protein binding;GO:1901363//heterocyclic compound binding;GO:0097159//organic cyclic compound binding;GO:0003700//sequence-specific DNA binding transcription factor activity;GO:0005488//binding;GO:0003676//nucleic acid binding;GO:0046983//protein dimerization activity;GO:0001071//nucleic acid binding transcription factor activity;GO:0005515//protein binding;GO:0003677//DNA b…	GO:0009704//de-etiolation;GO:0090304//nucleic acid metabolic process;GO:0007602//phototransduction;GO:0070887//cellular response to chemical stimulus;GO:0009639//response to red or far red light;GO:0009628//response to abiotic stimulus;GO:0007154//cell communication;GO:0051716//cellular response to stimulus;GO:0019222//regulation of metabolic process;GO:0044260//cellular macromolecule metabolic p…
Gh_D07G1303	51.14	44.78	40.99	37.99	37.85	33.09	33.01	35.87	37.17	53.67	45.23	48.76	38.5	33.74	33.5	19.57	38.95	25.76	1246.52	1124.44	898.13	868.16	1107.16	774.13	862.28	744.88	827.52	1348.47	901.07	1146.91	1090.27	706.88	638.66	461.79	926.05	569.43	Gh_D07G1303	Gh_D07G1303	Transcription factor PIF3 [Source:UniProtKB/Swiss-Prot;Acc:O80536]	Organismal Systems;Environmental Information Processing	Signal transduction;Environmental adaptation	ko04075//Plant hormone signal transduction;ko04712//Circadian rhythm - plant	GO:0043229//intracellular organelle;GO:0005623//cell;GO:0043226//organelle;GO:0043231//intracellular membrane-bounded organelle;GO:0043227//membrane-bounded organelle;GO:0044424//intracellular part;GO:0044464//cell part;GO:0005622//intracellular;GO:0005634//nucleus	GO:0042802//identical protein binding;GO:1901363//heterocyclic compound binding;GO:0097159//organic cyclic compound binding;GO:0003700//sequence-specific DNA binding transcription factor activity;GO:0005488//binding;GO:0003676//nucleic acid binding;GO:0046983//protein dimerization activity;GO:0001071//nucleic acid binding transcription factor activity;GO:0005515//protein binding;GO:0003677//DNA b…	GO:0009704//de-etiolation;GO:0090304//nucleic acid metabolic process;GO:0007602//phototransduction;GO:0070887//cellular response to chemical stimulus;GO:0009639//response to red or far red light;GO:0009628//response to abiotic stimulus;GO:0007154//cell communication;GO:0051716//cellular response to stimulus;GO:0019222//regulation of metabolic process;GO:0044260//cellular macromolecule metabolic p…
Gh_D11G2839	7.16	6.66	6.65	5.29	5.65	5.42	3.55	4.27	3.14	6.79	7.79	7.82	6.07	5.06	5.99	4.78	3.81	3.64	260	249	217	180	246	189	138	132	104	254	231	274	256	158	170	168	135	120	Gh_D11G2839	Gh_D11G2839	Transcription factor PIF3 [Source:UniProtKB/Swiss-Prot;Acc:O80536]	Organismal Systems;Environmental Information Processing	Signal transduction;Environmental adaptation	ko04075//Plant hormone signal transduction;ko04712//Circadian rhythm - plant	GO:0043229//intracellular organelle;GO:0005623//cell;GO:0043226//organelle;GO:0043231//intracellular membrane-bounded organelle;GO:0043227//membrane-bounded organelle;GO:0044424//intracellular part;GO:0044464//cell part;GO:0005622//intracellular;GO:0005634//nucleus	GO:0042802//identical protein binding;GO:1901363//heterocyclic compound binding;GO:0097159//organic cyclic compound binding;GO:0003700//sequence-specific DNA binding transcription factor activity;GO:0005488//binding;GO:0003676//nucleic acid binding;GO:0046983//protein dimerization activity;GO:0001071//nucleic acid binding transcription factor activity;GO:0005515//protein binding;GO:0003677//DNA b…	GO:0009704//de-etiolation;GO:0090304//nucleic acid metabolic process;GO:0007602//phototransduction;GO:0070887//cellular response to chemical stimulus;GO:0009639//response to red or far red light;GO:0009628//response to abiotic stimulus;GO:0007154//cell communication;GO:0051716//cellular response to stimulus;GO:0019222//regulation of metabolic process;GO:0044260//cellular macromolecule metabolic p…
Gh_A02G1305	24.94	25.9	29.67	24.69	23.8	21.96	21.21	20.67	20.67	23.43	21.96	21.7	26.41	21.4	24.46	20.7	19.46	18.7	1522.45	1628.62	1628.05	1412.94	1743.33	1286.8	1387.4	1074.74	1152.56	1474.26	1095.64	1278.33	1873.04	1122.98	1167.86	1223.16	1158.21	1035.29	Gh_A02G1305	Gh_A02G1305	Protein BRASSINOSTEROID INSENSITIVE 1 [Source:UniProtKB/Swiss-Prot;Acc:O22476]	Environmental Information Processing	Signal transduction	ko04075//Plant hormone signal transduction	GO:0098588//bounding membrane of organelle;GO:0016021//integral component of membrane;GO:0043226//organelle;GO:0044444//cytoplasmic part;GO:0010008//endosome membrane;GO:0044424//intracellular part;GO:0005622//intracellular;GO:0044422//organelle part;GO:0044425//membrane part;GO:0031224//intrinsic component of membrane;GO:0044446//intracellular organelle part;GO:0043229//intracellular organelle;G…	GO:0004871//signal transducer activity;GO:0032549//ribonucleoside binding;GO:0004672//protein kinase activity;GO:0003824//catalytic activity;GO:0005524//ATP binding;GO:0046983//protein dimerization activity;GO:0032553//ribonucleotide binding;GO:0005488//binding;GO:0004714//transmembrane receptor protein tyrosine kinase activity;GO:1901363//heterocyclic compound binding;GO:0004872//receptor activi…	GO:0009555//pollen development;GO:0042221//response to chemical;GO:0048869//cellular developmental process;GO:0048449//floral organ formation;GO:0097306//cellular response to alcohol;GO:0060548//negative regulation of cell death;GO:0071367//cellular response to brassinosteroid stimulus;GO:0071383//cellular response to steroid hormone stimulus;GO:0065007//biological regulation;GO:0019538//protein …
Gh_A11G0504	7.59	8.43	7.74	8.36	9.04	10.07	11.3	11.22	11.06	6.89	7.2	6.56	9.43	8.04	6.65	7.23	7.64	10.13	466.5	533.56	427.62	481.92	666.46	593.67	744.24	587.23	620.74	436.29	361.47	389.24	673.25	424.83	319.59	430.24	457.87	564.47	Gh_A11G0504	Gh_A11G0504	Protein BRASSINOSTEROID INSENSITIVE 1 [Source:UniProtKB/Swiss-Prot;Acc:O22476]	Environmental Information Processing	Signal transduction	ko04075//Plant hormone signal transduction	GO:0098588//bounding membrane of organelle;GO:0016021//integral component of membrane;GO:0043226//organelle;GO:0044444//cytoplasmic part;GO:0010008//endosome membrane;GO:0044424//intracellular part;GO:0005622//intracellular;GO:0044422//organelle part;GO:0044425//membrane part;GO:0031224//intrinsic component of membrane;GO:0044446//intracellular organelle part;GO:0043229//intracellular organelle;G…	GO:0004871//signal transducer activity;GO:0032549//ribonucleoside binding;GO:0004672//protein kinase activity;GO:0003824//catalytic activity;GO:0005524//ATP binding;GO:0046983//protein dimerization activity;GO:0032553//ribonucleotide binding;GO:0005488//binding;GO:0004714//transmembrane receptor protein tyrosine kinase activity;GO:1901363//heterocyclic compound binding;GO:0004872//receptor activi…	GO:0009555//pollen development;GO:0042221//response to chemical;GO:0048869//cellular developmental process;GO:0048449//floral organ formation;GO:0097306//cellular response to alcohol;GO:0060548//negative regulation of cell death;GO:0071367//cellular response to brassinosteroid stimulus;GO:0071383//cellular response to steroid hormone stimulus;GO:0065007//biological regulation;GO:0019538//protein …
Gh_A11G3159	4.69	6.31	7.28	6	4.78	3.91	3.82	2.87	3.3	3.35	3.77	3.49	4.9	3.43	3.3	4.8	3.38	3.91	288.05	399.74	401.93	345.39	352.61	230.88	251.53	150.48	184.97	212.23	189.4	207.12	349.68	181.22	158.49	285.68	202.58	217.7	Gh_A11G3159	Gh_A11G3159	Protein BRASSINOSTEROID INSENSITIVE 1 [Source:UniProtKB/Swiss-Prot;Acc:O22476]	Environmental Information Processing	Signal transduction	ko04075//Plant hormone signal transduction	GO:0098588//bounding membrane of organelle;GO:0016021//integral component of membrane;GO:0043226//organelle;GO:0044444//cytoplasmic part;GO:0010008//endosome membrane;GO:0044424//intracellular part;GO:0005622//intracellular;GO:0044422//organelle part;GO:0044425//membrane part;GO:0031224//intrinsic component of membrane;GO:0044446//intracellular organelle part;GO:0043229//intracellular organelle;G…	GO:0004871//signal transducer activity;GO:0032549//ribonucleoside binding;GO:0004672//protein kinase activity;GO:0003824//catalytic activity;GO:0005524//ATP binding;GO:0046983//protein dimerization activity;GO:0032553//ribonucleotide binding;GO:0005488//binding;GO:0004714//transmembrane receptor protein tyrosine kinase activity;GO:1901363//heterocyclic compound binding;GO:0004872//receptor activi…	GO:0009555//pollen development;GO:0042221//response to chemical;GO:0048869//cellular developmental process;GO:0048449//floral organ formation;GO:0097306//cellular response to alcohol;GO:0060548//negative regulation of cell death;GO:0071367//cellular response to brassinosteroid stimulus;GO:0071383//cellular response to steroid hormone stimulus;GO:0065007//biological regulation;GO:0019538//protein …
Gh_D03G0445	19.19	18.6	24.13	15.59	15.26	12.91	14.35	14.54	13.32	22.34	20.29	21.04	18.97	15.3	17.85	11.29	13.82	13.49	1171.55	1169.38	1323.95	892.06	1117.67	756.2	938.6	756.26	742.44	1405.74	1012.36	1239.67	1344.96	803.02	852.14	666.84	822.79	746.71	Gh_D03G0445	Gh_D03G0445	Protein BRASSINOSTEROID INSENSITIVE 1 [Source:UniProtKB/Swiss-Prot;Acc:O22476]	Environmental Information Processing	Signal transduction	ko04075//Plant hormone signal transduction	GO:0098588//bounding membrane of organelle;GO:0016021//integral component of membrane;GO:0043226//organelle;GO:0044444//cytoplasmic part;GO:0010008//endosome membrane;GO:0044424//intracellular part;GO:0005622//intracellular;GO:0044422//organelle part;GO:0044425//membrane part;GO:0031224//intrinsic component of membrane;GO:0044446//intracellular organelle part;GO:0043229//intracellular organelle;G…	GO:0004871//signal transducer activity;GO:0032549//ribonucleoside binding;GO:0004672//protein kinase activity;GO:0003824//catalytic activity;GO:0005524//ATP binding;GO:0046983//protein dimerization activity;GO:0032553//ribonucleotide binding;GO:0005488//binding;GO:0004714//transmembrane receptor protein tyrosine kinase activity;GO:1901363//heterocyclic compound binding;GO:0004872//receptor activi…	GO:0009555//pollen development;GO:0042221//response to chemical;GO:0048869//cellular developmental process;GO:0048449//floral organ formation;GO:0097306//cellular response to alcohol;GO:0060548//negative regulation of cell death;GO:0071367//cellular response to brassinosteroid stimulus;GO:0071383//cellular response to steroid hormone stimulus;GO:0065007//biological regulation;GO:0019538//protein …
Gh_D11G0582	6.39	6.33	7.66	6.77	7.97	7.52	8.07	8.76	7.33	6.1	5.7	6.94	7.18	5.99	6.42	7.39	5.61	7.04	392.5	400.44	423.38	390.08	587.54	443.33	531.76	458.77	411.26	386.71	286.53	411.76	512.75	316.17	308.41	439.76	336.13	392.53	Gh_D11G0582	Gh_D11G0582	Protein BRASSINOSTEROID INSENSITIVE 1 [Source:UniProtKB/Swiss-Prot;Acc:O22476]	Environmental Information Processing	Signal transduction	ko04075//Plant hormone signal transduction	GO:0098588//bounding membrane of organelle;GO:0016021//integral component of membrane;GO:0043226//organelle;GO:0044444//cytoplasmic part;GO:0010008//endosome membrane;GO:0044424//intracellular part;GO:0005622//intracellular;GO:0044422//organelle part;GO:0044425//membrane part;GO:0031224//intrinsic component of membrane;GO:0044446//intracellular organelle part;GO:0043229//intracellular organelle;G…	GO:0004871//signal transducer activity;GO:0032549//ribonucleoside binding;GO:0004672//protein kinase activity;GO:0003824//catalytic activity;GO:0005524//ATP binding;GO:0046983//protein dimerization activity;GO:0032553//ribonucleotide binding;GO:0005488//binding;GO:0004714//transmembrane receptor protein tyrosine kinase activity;GO:1901363//heterocyclic compound binding;GO:0004872//receptor activi…	GO:0009555//pollen development;GO:0042221//response to chemical;GO:0048869//cellular developmental process;GO:0048449//floral organ formation;GO:0097306//cellular response to alcohol;GO:0060548//negative regulation of cell death;GO:0071367//cellular response to brassinosteroid stimulus;GO:0071383//cellular response to steroid hormone stimulus;GO:0065007//biological regulation;GO:0019538//protein …
Gh_D11G2243	9.29	12.83	13.8	12.21	9.61	9.09	7.14	6.83	6.65	7.95	9.19	7.79	8.03	7.02	7.31	9.29	7.08	5.73	570.95	812.26	762.07	703.61	708.39	536.12	470.47	357.52	373.03	503.77	461.6	461.88	573.32	370.78	351.51	552.32	424.42	319.3	Gh_D11G2243	Gh_D11G2243	Protein BRASSINOSTEROID INSENSITIVE 1 [Source:UniProtKB/Swiss-Prot;Acc:O22476]	Environmental Information Processing	Signal transduction	ko04075//Plant hormone signal transduction	GO:0098588//bounding membrane of organelle;GO:0016021//integral component of membrane;GO:0043226//organelle;GO:0044444//cytoplasmic part;GO:0010008//endosome membrane;GO:0044424//intracellular part;GO:0005622//intracellular;GO:0044422//organelle part;GO:0044425//membrane part;GO:0031224//intrinsic component of membrane;GO:0044446//intracellular organelle part;GO:0043229//intracellular organelle;G…	GO:0004871//signal transducer activity;GO:0032549//ribonucleoside binding;GO:0004672//protein kinase activity;GO:0003824//catalytic activity;GO:0005524//ATP binding;GO:0046983//protein dimerization activity;GO:0032553//ribonucleotide binding;GO:0005488//binding;GO:0004714//transmembrane receptor protein tyrosine kinase activity;GO:1901363//heterocyclic compound binding;GO:0004872//receptor activi…	GO:0009555//pollen development;GO:0042221//response to chemical;GO:0048869//cellular developmental process;GO:0048449//floral organ formation;GO:0097306//cellular response to alcohol;GO:0060548//negative regulation of cell death;GO:0071367//cellular response to brassinosteroid stimulus;GO:0071383//cellular response to steroid hormone stimulus;GO:0065007//biological regulation;GO:0019538//protein …
Gh_A03G2162	14.39	13.66	13.46	13.85	12.9	15.35	19.2	17.56	18.28	12.16	13.94	11.72	14.28	11.64	13.54	13.99	12.86	13.95	459.57	449.55	386.51	414.75	494.44	470.47	656.97	477.73	533.15	400.3	363.92	361.12	529.92	319.48	338.09	432.32	400.4	403.95	Gh_A03G2162	Gh_A03G2162	BRASSINOSTEROID INSENSITIVE 1-associated receptor kinase 1 [Source:UniProtKB/Swiss-Prot;Acc:Q94F62]	Organismal Systems;Environmental Information Processing	Signal transduction;Environmental adaptation	ko04075//Plant hormone signal transduction;ko04626//Plant-pathogen interaction	GO:0012505//endomembrane system;GO:0031224//intrinsic component of membrane;GO:0044425//membrane part;GO:0044422//organelle part;GO:0044444//cytoplasmic part;GO:0043231//intracellular membrane-bounded organelle;GO:0071944//cell periphery;GO:0005886//plasma membrane;GO:0005737//cytoplasm;GO:0016020//membrane;GO:0044464//cell part;GO:0044440//endosomal part;GO:0031090//organelle membrane;GO:0043227…	GO:0005515//protein binding;GO:0016773//phosphotransferase activity, alcohol group as acceptor;GO:1901363//heterocyclic compound binding;GO:0032555//purine ribonucleotide binding;GO:0032553//ribonucleotide binding;GO:0043167//ion binding;GO:0001883//purine nucleoside binding;GO:0036094//small molecule binding;GO:0030554//adenyl nucleotide binding;GO:0019199//transmembrane receptor protein kinase …	GO:0006793//phosphorus metabolic process;GO:0019538//protein metabolic process;GO:0006468//protein phosphorylation;GO:0009987//cellular process;GO:0043412//macromolecule modification;GO:0071704//organic substance metabolic process;GO:0044237//cellular metabolic process;GO:0016310//phosphorylation;GO:0043170//macromolecule metabolic process;GO:0008152//metabolic process;GO:0006796//phosphate-conta…
Gh_A04G0958	3.49	3.77	3.67	3.72	3.72	4.37	3.95	4.96	4.69	2.75	2.64	2.71	2.59	1.88	2.18	3.35	2.75	3.34	109.76	122.26	103.76	109.65	140.41	132.07	133.09	133.04	134.79	89.34	68.02	82.2	94.78	50.94	53.73	102.12	84.38	95.26	Gh_A04G0958	Gh_A04G0958	BRASSINOSTEROID INSENSITIVE 1-associated receptor kinase 1 [Source:UniProtKB/Swiss-Prot;Acc:Q94F62]	Organismal Systems;Environmental Information Processing	Signal transduction;Environmental adaptation	ko04075//Plant hormone signal transduction;ko04626//Plant-pathogen interaction	GO:0012505//endomembrane system;GO:0031224//intrinsic component of membrane;GO:0044425//membrane part;GO:0044422//organelle part;GO:0044444//cytoplasmic part;GO:0043231//intracellular membrane-bounded organelle;GO:0071944//cell periphery;GO:0005886//plasma membrane;GO:0005737//cytoplasm;GO:0016020//membrane;GO:0044464//cell part;GO:0044440//endosomal part;GO:0031090//organelle membrane;GO:0043227…	GO:0005515//protein binding;GO:0016773//phosphotransferase activity, alcohol group as acceptor;GO:1901363//heterocyclic compound binding;GO:0032555//purine ribonucleotide binding;GO:0032553//ribonucleotide binding;GO:0043167//ion binding;GO:0001883//purine nucleoside binding;GO:0036094//small molecule binding;GO:0030554//adenyl nucleotide binding;GO:0019199//transmembrane receptor protein kinase …	GO:0006793//phosphorus metabolic process;GO:0019538//protein metabolic process;GO:0006468//protein phosphorylation;GO:0009987//cellular process;GO:0043412//macromolecule modification;GO:0071704//organic substance metabolic process;GO:0044237//cellular metabolic process;GO:0016310//phosphorylation;GO:0043170//macromolecule metabolic process;GO:0008152//metabolic process;GO:0006796//phosphate-conta…
Gh_A04G0959	8.03	6.46	5.78	10.53	9.84	8.86	11.26	12.35	9.07	5.5	4.62	5.65	7.69	8.04	6.75	7.98	8.19	7.95	187	155	121	230	275	198	281	245	193	132	88	127	208	161	123	180	186	168	Gh_A04G0959	Gh_A04G0959	BRASSINOSTEROID INSENSITIVE 1-associated receptor kinase 1 [Source:UniProtKB/Swiss-Prot;Acc:Q94F62]	Organismal Systems;Environmental Information Processing	Signal transduction;Environmental adaptation	ko04075//Plant hormone signal transduction;ko04626//Plant-pathogen interaction	GO:0012505//endomembrane system;GO:0031224//intrinsic component of membrane;GO:0044425//membrane part;GO:0044422//organelle part;GO:0044444//cytoplasmic part;GO:0043231//intracellular membrane-bounded organelle;GO:0071944//cell periphery;GO:0005886//plasma membrane;GO:0005737//cytoplasm;GO:0016020//membrane;GO:0044464//cell part;GO:0044440//endosomal part;GO:0031090//organelle membrane;GO:0043227…	GO:0005515//protein binding;GO:0016773//phosphotransferase activity, alcohol group as acceptor;GO:1901363//heterocyclic compound binding;GO:0032555//purine ribonucleotide binding;GO:0032553//ribonucleotide binding;GO:0043167//ion binding;GO:0001883//purine nucleoside binding;GO:0036094//small molecule binding;GO:0030554//adenyl nucleotide binding;GO:0019199//transmembrane receptor protein kinase …	GO:0006793//phosphorus metabolic process;GO:0019538//protein metabolic process;GO:0006468//protein phosphorylation;GO:0009987//cellular process;GO:0043412//macromolecule modification;GO:0071704//organic substance metabolic process;GO:0044237//cellular metabolic process;GO:0016310//phosphorylation;GO:0043170//macromolecule metabolic process;GO:0008152//metabolic process;GO:0006796//phosphate-conta…
Gh_A05G2681	0	0	0	0	0	0	0	0	0	0	0	0	0	0	0	0	0	0	0	0	0	0	0	0	0	0	0	0	0	0	0	0	0	0	0	0	Gh_A05G2681	Gh_A05G2681	BRASSINOSTEROID INSENSITIVE 1-associated receptor kinase 1 [Source:UniProtKB/Swiss-Prot;Acc:Q94F62]	Organismal Systems;Environmental Information Processing	Signal transduction;Environmental adaptation	ko04075//Plant hormone signal transduction;ko04626//Plant-pathogen interaction	GO:0012505//endomembrane system;GO:0031224//intrinsic component of membrane;GO:0044425//membrane part;GO:0044422//organelle part;GO:0044444//cytoplasmic part;GO:0043231//intracellular membrane-bounded organelle;GO:0071944//cell periphery;GO:0005886//plasma membrane;GO:0005737//cytoplasm;GO:0016020//membrane;GO:0044464//cell part;GO:0044440//endosomal part;GO:0031090//organelle membrane;GO:0043227…	GO:0005515//protein binding;GO:0016773//phosphotransferase activity, alcohol group as acceptor;GO:1901363//heterocyclic compound binding;GO:0032555//purine ribonucleotide binding;GO:0032553//ribonucleotide binding;GO:0043167//ion binding;GO:0001883//purine nucleoside binding;GO:0036094//small molecule binding;GO:0030554//adenyl nucleotide binding;GO:0019199//transmembrane receptor protein kinase …	GO:0006793//phosphorus metabolic process;GO:0019538//protein metabolic process;GO:0006468//protein phosphorylation;GO:0009987//cellular process;GO:0043412//macromolecule modification;GO:0071704//organic substance metabolic process;GO:0044237//cellular metabolic process;GO:0016310//phosphorylation;GO:0043170//macromolecule metabolic process;GO:0008152//metabolic process;GO:0006796//phosphate-conta…
Gh_A13G0578	1.01	0.66	0.4	0.98	0.74	0.8	0.64	0.91	1.45	0.47	1.02	1.06	0.28	0.59	0.67	0.47	0.65	0.67	21.93	14.78	7.77	20.06	19.23	16.6	14.82	16.95	28.75	10.44	18.07	22.32	7.05	11	11.35	9.88	13.81	13.21	Gh_A13G0578	Gh_A13G0578	BRASSINOSTEROID INSENSITIVE 1-associated receptor kinase 1 [Source:UniProtKB/Swiss-Prot;Acc:Q94F62]	Organismal Systems;Environmental Information Processing	Signal transduction;Environmental adaptation	ko04075//Plant hormone signal transduction;ko04626//Plant-pathogen interaction	GO:0012505//endomembrane system;GO:0031224//intrinsic component of membrane;GO:0044425//membrane part;GO:0044422//organelle part;GO:0044444//cytoplasmic part;GO:0043231//intracellular membrane-bounded organelle;GO:0071944//cell periphery;GO:0005886//plasma membrane;GO:0005737//cytoplasm;GO:0016020//membrane;GO:0044464//cell part;GO:0044440//endosomal part;GO:0031090//organelle membrane;GO:0043227…	GO:0005515//protein binding;GO:0016773//phosphotransferase activity, alcohol group as acceptor;GO:1901363//heterocyclic compound binding;GO:0032555//purine ribonucleotide binding;GO:0032553//ribonucleotide binding;GO:0043167//ion binding;GO:0001883//purine nucleoside binding;GO:0036094//small molecule binding;GO:0030554//adenyl nucleotide binding;GO:0019199//transmembrane receptor protein kinase …	GO:0006793//phosphorus metabolic process;GO:0019538//protein metabolic process;GO:0006468//protein phosphorylation;GO:0009987//cellular process;GO:0043412//macromolecule modification;GO:0071704//organic substance metabolic process;GO:0044237//cellular metabolic process;GO:0016310//phosphorylation;GO:0043170//macromolecule metabolic process;GO:0008152//metabolic process;GO:0006796//phosphate-conta…
Gh_A13G0579	0	0	0	0	0	0	0	0	0	0	0	0	0	0	0	0	0	0	0	0	0	0	0	0	0	0	0	0	0	0	0	0	0	0	0	0	Gh_A13G0579	Gh_A13G0579	BRASSINOSTEROID INSENSITIVE 1-associated receptor kinase 1 [Source:UniProtKB/Swiss-Prot;Acc:Q94F62]	Organismal Systems;Environmental Information Processing	Signal transduction;Environmental adaptation	ko04075//Plant hormone signal transduction;ko04626//Plant-pathogen interaction	GO:0012505//endomembrane system;GO:0031224//intrinsic component of membrane;GO:0044425//membrane part;GO:0044422//organelle part;GO:0044444//cytoplasmic part;GO:0043231//intracellular membrane-bounded organelle;GO:0071944//cell periphery;GO:0005886//plasma membrane;GO:0005737//cytoplasm;GO:0016020//membrane;GO:0044464//cell part;GO:0044440//endosomal part;GO:0031090//organelle membrane;GO:0043227…	GO:0005515//protein binding;GO:0016773//phosphotransferase activity, alcohol group as acceptor;GO:1901363//heterocyclic compound binding;GO:0032555//purine ribonucleotide binding;GO:0032553//ribonucleotide binding;GO:0043167//ion binding;GO:0001883//purine nucleoside binding;GO:0036094//small molecule binding;GO:0030554//adenyl nucleotide binding;GO:0019199//transmembrane receptor protein kinase …	GO:0006793//phosphorus metabolic process;GO:0019538//protein metabolic process;GO:0006468//protein phosphorylation;GO:0009987//cellular process;GO:0043412//macromolecule modification;GO:0071704//organic substance metabolic process;GO:0044237//cellular metabolic process;GO:0016310//phosphorylation;GO:0043170//macromolecule metabolic process;GO:0008152//metabolic process;GO:0006796//phosphate-conta…
Gh_D01G1374	0	0	0	0	0	0	0	0	0	0	0	0	0	0	0	0	0	0	0	0	0	0	0	0	0	0	0	0	0	0	0	0	0	0	0	0	Gh_D01G1374	Gh_D01G1374	BRASSINOSTEROID INSENSITIVE 1-associated receptor kinase 1 [Source:UniProtKB/Swiss-Prot;Acc:Q94F62]	Organismal Systems;Environmental Information Processing	Signal transduction;Environmental adaptation	ko04075//Plant hormone signal transduction;ko04626//Plant-pathogen interaction	GO:0012505//endomembrane system;GO:0031224//intrinsic component of membrane;GO:0044425//membrane part;GO:0044422//organelle part;GO:0044444//cytoplasmic part;GO:0043231//intracellular membrane-bounded organelle;GO:0071944//cell periphery;GO:0005886//plasma membrane;GO:0005737//cytoplasm;GO:0016020//membrane;GO:0044464//cell part;GO:0044440//endosomal part;GO:0031090//organelle membrane;GO:0043227…	GO:0005515//protein binding;GO:0016773//phosphotransferase activity, alcohol group as acceptor;GO:1901363//heterocyclic compound binding;GO:0032555//purine ribonucleotide binding;GO:0032553//ribonucleotide binding;GO:0043167//ion binding;GO:0001883//purine nucleoside binding;GO:0036094//small molecule binding;GO:0030554//adenyl nucleotide binding;GO:0019199//transmembrane receptor protein kinase …	GO:0006793//phosphorus metabolic process;GO:0019538//protein metabolic process;GO:0006468//protein phosphorylation;GO:0009987//cellular process;GO:0043412//macromolecule modification;GO:0071704//organic substance metabolic process;GO:0044237//cellular metabolic process;GO:0016310//phosphorylation;GO:0043170//macromolecule metabolic process;GO:0008152//metabolic process;GO:0006796//phosphate-conta…
Gh_D01G1794	0	0	0	0	0	0	0	0	0	0	0	0	0	0	0	0	0	0	0	0	0	0	0	0	0	0	0	0	0	0	0	0	0	0	0	0	Gh_D01G1794	Gh_D01G1794	BRASSINOSTEROID INSENSITIVE 1-associated receptor kinase 1 [Source:UniProtKB/Swiss-Prot;Acc:Q94F62]	Organismal Systems;Environmental Information Processing	Signal transduction;Environmental adaptation	ko04075//Plant hormone signal transduction;ko04626//Plant-pathogen interaction	GO:0012505//endomembrane system;GO:0031224//intrinsic component of membrane;GO:0044425//membrane part;GO:0044422//organelle part;GO:0044444//cytoplasmic part;GO:0043231//intracellular membrane-bounded organelle;GO:0071944//cell periphery;GO:0005886//plasma membrane;GO:0005737//cytoplasm;GO:0016020//membrane;GO:0044464//cell part;GO:0044440//endosomal part;GO:0031090//organelle membrane;GO:0043227…	GO:0005515//protein binding;GO:0016773//phosphotransferase activity, alcohol group as acceptor;GO:1901363//heterocyclic compound binding;GO:0032555//purine ribonucleotide binding;GO:0032553//ribonucleotide binding;GO:0043167//ion binding;GO:0001883//purine nucleoside binding;GO:0036094//small molecule binding;GO:0030554//adenyl nucleotide binding;GO:0019199//transmembrane receptor protein kinase …	GO:0006793//phosphorus metabolic process;GO:0019538//protein metabolic process;GO:0006468//protein phosphorylation;GO:0009987//cellular process;GO:0043412//macromolecule modification;GO:0071704//organic substance metabolic process;GO:0044237//cellular metabolic process;GO:0016310//phosphorylation;GO:0043170//macromolecule metabolic process;GO:0008152//metabolic process;GO:0006796//phosphate-conta…
Gh_D02G1987	11	10.83	13.29	11.93	11.55	11.8	13.59	15.6	14.6	9.35	10.19	10.18	11.32	9.42	7.67	13.12	10.52	10.88	351.43	356.45	381.49	357.25	442.56	361.53	465.03	424.27	425.85	307.7	266.08	313.88	420.08	258.52	191.62	405.68	327.6	315.05	Gh_D02G1987	Gh_D02G1987	BRASSINOSTEROID INSENSITIVE 1-associated receptor kinase 1 [Source:UniProtKB/Swiss-Prot;Acc:Q94F62]	Organismal Systems;Environmental Information Processing	Signal transduction;Environmental adaptation	ko04075//Plant hormone signal transduction;ko04626//Plant-pathogen interaction	GO:0012505//endomembrane system;GO:0031224//intrinsic component of membrane;GO:0044425//membrane part;GO:0044422//organelle part;GO:0044444//cytoplasmic part;GO:0043231//intracellular membrane-bounded organelle;GO:0071944//cell periphery;GO:0005886//plasma membrane;GO:0005737//cytoplasm;GO:0016020//membrane;GO:0044464//cell part;GO:0044440//endosomal part;GO:0031090//organelle membrane;GO:0043227…	GO:0005515//protein binding;GO:0016773//phosphotransferase activity, alcohol group as acceptor;GO:1901363//heterocyclic compound binding;GO:0032555//purine ribonucleotide binding;GO:0032553//ribonucleotide binding;GO:0043167//ion binding;GO:0001883//purine nucleoside binding;GO:0036094//small molecule binding;GO:0030554//adenyl nucleotide binding;GO:0019199//transmembrane receptor protein kinase …	GO:0006793//phosphorus metabolic process;GO:0019538//protein metabolic process;GO:0006468//protein phosphorylation;GO:0009987//cellular process;GO:0043412//macromolecule modification;GO:0071704//organic substance metabolic process;GO:0044237//cellular metabolic process;GO:0016310//phosphorylation;GO:0043170//macromolecule metabolic process;GO:0008152//metabolic process;GO:0006796//phosphate-conta…
Gh_D04G1502	2.97	2.59	2.85	3.07	3.45	3.29	3.86	4.65	4.29	2.66	2.44	2.69	2.79	2.18	2.17	2.03	2.8	4.3	93.45	83.88	80.53	90.37	130.17	99.31	130.09	124.48	123.14	86.31	62.58	81.57	101.88	58.93	53.23	61.75	85.93	122.46	Gh_D04G1502	Gh_D04G1502	BRASSINOSTEROID INSENSITIVE 1-associated receptor kinase 1 [Source:UniProtKB/Swiss-Prot;Acc:Q94F62]	Organismal Systems;Environmental Information Processing	Signal transduction;Environmental adaptation	ko04075//Plant hormone signal transduction;ko04626//Plant-pathogen interaction	GO:0012505//endomembrane system;GO:0031224//intrinsic component of membrane;GO:0044425//membrane part;GO:0044422//organelle part;GO:0044444//cytoplasmic part;GO:0043231//intracellular membrane-bounded organelle;GO:0071944//cell periphery;GO:0005886//plasma membrane;GO:0005737//cytoplasm;GO:0016020//membrane;GO:0044464//cell part;GO:0044440//endosomal part;GO:0031090//organelle membrane;GO:0043227…	GO:0005515//protein binding;GO:0016773//phosphotransferase activity, alcohol group as acceptor;GO:1901363//heterocyclic compound binding;GO:0032555//purine ribonucleotide binding;GO:0032553//ribonucleotide binding;GO:0043167//ion binding;GO:0001883//purine nucleoside binding;GO:0036094//small molecule binding;GO:0030554//adenyl nucleotide binding;GO:0019199//transmembrane receptor protein kinase …	GO:0006793//phosphorus metabolic process;GO:0019538//protein metabolic process;GO:0006468//protein phosphorylation;GO:0009987//cellular process;GO:0043412//macromolecule modification;GO:0071704//organic substance metabolic process;GO:0044237//cellular metabolic process;GO:0016310//phosphorylation;GO:0043170//macromolecule metabolic process;GO:0008152//metabolic process;GO:0006796//phosphate-conta…
Gh_D04G1503	0.81	0.86	0.72	1.19	0.86	0.81	0.61	0.4	0.61	0.14	0.62	0.11	0.35	0.12	0.17	0.21	0.56	0.7	24.79	26.87	19.7	33.98	31.41	23.62	19.82	10.48	17.07	4.35	15.41	3.24	12.33	3.13	4.04	6.13	16.69	19.28	Gh_D04G1503	Gh_D04G1503	BRASSINOSTEROID INSENSITIVE 1-associated receptor kinase 1 [Source:UniProtKB/Swiss-Prot;Acc:Q94F62]	Organismal Systems;Environmental Information Processing	Signal transduction;Environmental adaptation	ko04075//Plant hormone signal transduction;ko04626//Plant-pathogen interaction	GO:0012505//endomembrane system;GO:0031224//intrinsic component of membrane;GO:0044425//membrane part;GO:0044422//organelle part;GO:0044444//cytoplasmic part;GO:0043231//intracellular membrane-bounded organelle;GO:0071944//cell periphery;GO:0005886//plasma membrane;GO:0005737//cytoplasm;GO:0016020//membrane;GO:0044464//cell part;GO:0044440//endosomal part;GO:0031090//organelle membrane;GO:0043227…	GO:0005515//protein binding;GO:0016773//phosphotransferase activity, alcohol group as acceptor;GO:1901363//heterocyclic compound binding;GO:0032555//purine ribonucleotide binding;GO:0032553//ribonucleotide binding;GO:0043167//ion binding;GO:0001883//purine nucleoside binding;GO:0036094//small molecule binding;GO:0030554//adenyl nucleotide binding;GO:0019199//transmembrane receptor protein kinase …	GO:0006793//phosphorus metabolic process;GO:0019538//protein metabolic process;GO:0006468//protein phosphorylation;GO:0009987//cellular process;GO:0043412//macromolecule modification;GO:0071704//organic substance metabolic process;GO:0044237//cellular metabolic process;GO:0016310//phosphorylation;GO:0043170//macromolecule metabolic process;GO:0008152//metabolic process;GO:0006796//phosphate-conta…
Gh_D12G2724	0	0	0	0	0	0	0	0	0	0	0	0	0	0	0	0	0	0	0	0	0	0	0	0	0	0	0	0	0	0	0	0	0	0	0	0	Gh_D12G2724	Gh_D12G2724	BRASSINOSTEROID INSENSITIVE 1-associated receptor kinase 1 [Source:UniProtKB/Swiss-Prot;Acc:Q94F62]	Organismal Systems;Environmental Information Processing	Signal transduction;Environmental adaptation	ko04075//Plant hormone signal transduction;ko04626//Plant-pathogen interaction	GO:0012505//endomembrane system;GO:0031224//intrinsic component of membrane;GO:0044425//membrane part;GO:0044422//organelle part;GO:0044444//cytoplasmic part;GO:0043231//intracellular membrane-bounded organelle;GO:0071944//cell periphery;GO:0005886//plasma membrane;GO:0005737//cytoplasm;GO:0016020//membrane;GO:0044464//cell part;GO:0044440//endosomal part;GO:0031090//organelle membrane;GO:0043227…	GO:0005515//protein binding;GO:0016773//phosphotransferase activity, alcohol group as acceptor;GO:1901363//heterocyclic compound binding;GO:0032555//purine ribonucleotide binding;GO:0032553//ribonucleotide binding;GO:0043167//ion binding;GO:0001883//purine nucleoside binding;GO:0036094//small molecule binding;GO:0030554//adenyl nucleotide binding;GO:0019199//transmembrane receptor protein kinase …	GO:0006793//phosphorus metabolic process;GO:0019538//protein metabolic process;GO:0006468//protein phosphorylation;GO:0009987//cellular process;GO:0043412//macromolecule modification;GO:0071704//organic substance metabolic process;GO:0044237//cellular metabolic process;GO:0016310//phosphorylation;GO:0043170//macromolecule metabolic process;GO:0008152//metabolic process;GO:0006796//phosphate-conta…
Gh_D13G0549	8.35	8.79	7.73	7.14	7.89	9.57	11.27	10.18	7.75	5.78	6.12	6.94	5.71	4.08	3.18	9.49	4.8	5.15	262	284	218	210	296.99	288	379	272	222	187	156.86	209.95	207.95	110	78	288	147	146.62	Gh_D13G0549	Gh_D13G0549	BRASSINOSTEROID INSENSITIVE 1-associated receptor kinase 1 [Source:UniProtKB/Swiss-Prot;Acc:Q94F62]	Organismal Systems;Environmental Information Processing	Signal transduction;Environmental adaptation	ko04075//Plant hormone signal transduction;ko04626//Plant-pathogen interaction	GO:0012505//endomembrane system;GO:0031224//intrinsic component of membrane;GO:0044425//membrane part;GO:0044422//organelle part;GO:0044444//cytoplasmic part;GO:0043231//intracellular membrane-bounded organelle;GO:0071944//cell periphery;GO:0005886//plasma membrane;GO:0005737//cytoplasm;GO:0016020//membrane;GO:0044464//cell part;GO:0044440//endosomal part;GO:0031090//organelle membrane;GO:0043227…	GO:0005515//protein binding;GO:0016773//phosphotransferase activity, alcohol group as acceptor;GO:1901363//heterocyclic compound binding;GO:0032555//purine ribonucleotide binding;GO:0032553//ribonucleotide binding;GO:0043167//ion binding;GO:0001883//purine nucleoside binding;GO:0036094//small molecule binding;GO:0030554//adenyl nucleotide binding;GO:0019199//transmembrane receptor protein kinase …	GO:0006793//phosphorus metabolic process;GO:0019538//protein metabolic process;GO:0006468//protein phosphorylation;GO:0009987//cellular process;GO:0043412//macromolecule modification;GO:0071704//organic substance metabolic process;GO:0044237//cellular metabolic process;GO:0016310//phosphorylation;GO:0043170//macromolecule metabolic process;GO:0008152//metabolic process;GO:0006796//phosphate-conta…
Gh_D13G0550	2.42	2.98	2.92	1.97	2.41	3.97	4.23	4.19	3.74	1.78	2.46	1.54	0.85	1.26	1.41	2.38	1.02	1.87	76.07	96.22	82.23	57.94	90.78	119.4	142.18	112.05	107.25	57.56	63.08	46.73	31	34	34.65	72.12	31.19	53.17	Gh_D13G0550	Gh_D13G0550	BRASSINOSTEROID INSENSITIVE 1-associated receptor kinase 1 [Source:UniProtKB/Swiss-Prot;Acc:Q94F62]	Organismal Systems;Environmental Information Processing	Signal transduction;Environmental adaptation	ko04075//Plant hormone signal transduction;ko04626//Plant-pathogen interaction	GO:0012505//endomembrane system;GO:0031224//intrinsic component of membrane;GO:0044425//membrane part;GO:0044422//organelle part;GO:0044444//cytoplasmic part;GO:0043231//intracellular membrane-bounded organelle;GO:0071944//cell periphery;GO:0005886//plasma membrane;GO:0005737//cytoplasm;GO:0016020//membrane;GO:0044464//cell part;GO:0044440//endosomal part;GO:0031090//organelle membrane;GO:0043227…	GO:0005515//protein binding;GO:0016773//phosphotransferase activity, alcohol group as acceptor;GO:1901363//heterocyclic compound binding;GO:0032555//purine ribonucleotide binding;GO:0032553//ribonucleotide binding;GO:0043167//ion binding;GO:0001883//purine nucleoside binding;GO:0036094//small molecule binding;GO:0030554//adenyl nucleotide binding;GO:0019199//transmembrane receptor protein kinase …	GO:0006793//phosphorus metabolic process;GO:0019538//protein metabolic process;GO:0006468//protein phosphorylation;GO:0009987//cellular process;GO:0043412//macromolecule modification;GO:0071704//organic substance metabolic process;GO:0044237//cellular metabolic process;GO:0016310//phosphorylation;GO:0043170//macromolecule metabolic process;GO:0008152//metabolic process;GO:0006796//phosphate-conta…
Gh_D13G0551	6.27	4.63	3.65	4.24	4.43	6.2	4.72	7.88	6.41	4.82	5.37	5.08	2.93	6.15	4.23	3.95	3.43	3.09	197	150	103	125	167	187	159	211	184	156	138	154	107	166	104	120	105	88	Gh_D13G0551	Gh_D13G0551	BRASSINOSTEROID INSENSITIVE 1-associated receptor kinase 1 [Source:UniProtKB/Swiss-Prot;Acc:Q94F62]	Organismal Systems;Environmental Information Processing	Signal transduction;Environmental adaptation	ko04075//Plant hormone signal transduction;ko04626//Plant-pathogen interaction	GO:0012505//endomembrane system;GO:0031224//intrinsic component of membrane;GO:0044425//membrane part;GO:0044422//organelle part;GO:0044444//cytoplasmic part;GO:0043231//intracellular membrane-bounded organelle;GO:0071944//cell periphery;GO:0005886//plasma membrane;GO:0005737//cytoplasm;GO:0016020//membrane;GO:0044464//cell part;GO:0044440//endosomal part;GO:0031090//organelle membrane;GO:0043227…	GO:0005515//protein binding;GO:0016773//phosphotransferase activity, alcohol group as acceptor;GO:1901363//heterocyclic compound binding;GO:0032555//purine ribonucleotide binding;GO:0032553//ribonucleotide binding;GO:0043167//ion binding;GO:0001883//purine nucleoside binding;GO:0036094//small molecule binding;GO:0030554//adenyl nucleotide binding;GO:0019199//transmembrane receptor protein kinase …	GO:0006793//phosphorus metabolic process;GO:0019538//protein metabolic process;GO:0006468//protein phosphorylation;GO:0009987//cellular process;GO:0043412//macromolecule modification;GO:0071704//organic substance metabolic process;GO:0044237//cellular metabolic process;GO:0016310//phosphorylation;GO:0043170//macromolecule metabolic process;GO:0008152//metabolic process;GO:0006796//phosphate-conta…
Gh_Sca218227G01	0	0	0	0	0	0	0	0	0	0	0	0	0	0	0.11	0	0	0	0	0	0	0	0	0	0	0	0	0	0	0	0	0	0.29	0	0	0	Gh_Sca218227G01	Gh_Sca218227G01	BRASSINOSTEROID INSENSITIVE 1-associated receptor kinase 1 [Source:UniProtKB/Swiss-Prot;Acc:Q94F62]	Organismal Systems;Environmental Information Processing	Signal transduction;Environmental adaptation	ko04075//Plant hormone signal transduction;ko04626//Plant-pathogen interaction	GO:0012505//endomembrane system;GO:0031224//intrinsic component of membrane;GO:0044425//membrane part;GO:0044422//organelle part;GO:0044444//cytoplasmic part;GO:0043231//intracellular membrane-bounded organelle;GO:0071944//cell periphery;GO:0005886//plasma membrane;GO:0005737//cytoplasm;GO:0016020//membrane;GO:0044464//cell part;GO:0044440//endosomal part;GO:0031090//organelle membrane;GO:0043227…	GO:0005515//protein binding;GO:0016773//phosphotransferase activity, alcohol group as acceptor;GO:1901363//heterocyclic compound binding;GO:0032555//purine ribonucleotide binding;GO:0032553//ribonucleotide binding;GO:0043167//ion binding;GO:0001883//purine nucleoside binding;GO:0036094//small molecule binding;GO:0030554//adenyl nucleotide binding;GO:0019199//transmembrane receptor protein kinase …	GO:0006793//phosphorus metabolic process;GO:0019538//protein metabolic process;GO:0006468//protein phosphorylation;GO:0009987//cellular process;GO:0043412//macromolecule modification;GO:0071704//organic substance metabolic process;GO:0044237//cellular metabolic process;GO:0016310//phosphorylation;GO:0043170//macromolecule metabolic process;GO:0008152//metabolic process;GO:0006796//phosphate-conta…
Gh_A08G1412	222.76	263.81	178.25	189.65	324.52	411.55	500.22	417.44	442.11	149.59	126.68	138.77	212.13	253.78	247.39	253.26	204.72	250.62	7732.73	9433.9	5561.64	6171.56	13517.8	13710.9	18608.4	12343.8	14015.4	5352.46	3593.83	4648.6	8554.09	7571.81	6715.75	8509.4	6930.62	7890.47	Gh_A08G1412	Gh_A08G1412	Transcription factor MYC2 [Source:UniProtKB/Swiss-Prot;Acc:Q39204]	Environmental Information Processing	Signal transduction	ko04075//Plant hormone signal transduction	GO:0005622//intracellular;GO:0043231//intracellular membrane-bounded organelle;GO:0044424//intracellular part;GO:0043227//membrane-bounded organelle;GO:0044464//cell part;GO:0005623//cell;GO:0043226//organelle;GO:0043229//intracellular organelle;GO:0005634//nucleus	GO:0005515//protein binding;GO:1901363//heterocyclic compound binding;GO:0005488//binding;GO:0003676//nucleic acid binding;GO:0097159//organic cyclic compound binding;GO:0003677//DNA binding;GO:0001071//nucleic acid binding transcription factor activity;GO:0003700//sequence-specific DNA binding transcription factor activity;GO:0046983//protein dimerization activity	GO:0048583//regulation of response to stimulus;GO:0001101//response to acid chemical;GO:0009987//cellular process;GO:0019438//aromatic compound biosynthetic process;GO:0044700//single organism signaling;GO:0007154//cell communication;GO:0043620//regulation of DNA-templated transcription in response to stress;GO:0090304//nucleic acid metabolic process;GO:0002831//regulation of response to biotic s…
Gh_A09G2341	11.51	12.69	8.03	13.52	17.3	25.72	41.71	36.74	42.47	6.23	4.24	6.63	10.96	14.6	10.86	14.13	11.1	17.04	390.76	443.76	245.02	430.12	704.45	837.85	1517.14	1062.4	1316.36	217.84	117.52	217.15	432.09	426.06	288.32	464.22	367.54	524.47	Gh_A09G2341	Gh_A09G2341	Transcription factor MYC2 [Source:UniProtKB/Swiss-Prot;Acc:Q39204]	Environmental Information Processing	Signal transduction	ko04075//Plant hormone signal transduction	GO:0005622//intracellular;GO:0043231//intracellular membrane-bounded organelle;GO:0044424//intracellular part;GO:0043227//membrane-bounded organelle;GO:0044464//cell part;GO:0005623//cell;GO:0043226//organelle;GO:0043229//intracellular organelle;GO:0005634//nucleus	GO:0005515//protein binding;GO:1901363//heterocyclic compound binding;GO:0005488//binding;GO:0003676//nucleic acid binding;GO:0097159//organic cyclic compound binding;GO:0003677//DNA binding;GO:0001071//nucleic acid binding transcription factor activity;GO:0003700//sequence-specific DNA binding transcription factor activity;GO:0046983//protein dimerization activity	GO:0048583//regulation of response to stimulus;GO:0001101//response to acid chemical;GO:0009987//cellular process;GO:0019438//aromatic compound biosynthetic process;GO:0044700//single organism signaling;GO:0007154//cell communication;GO:0043620//regulation of DNA-templated transcription in response to stress;GO:0090304//nucleic acid metabolic process;GO:0002831//regulation of response to biotic s…
Gh_A12G1041	0	0	0.17	0	0	0	0.29	0	0	0.3	0.37	0.32	0.13	0	0.39	0	0	0.17	0	0	1	0	0	0	2	0	0	2	2	2	1	0	2	0	0	1	Gh_A12G1041	Gh_A12G1041	Transcription factor MYC2 [Source:UniProtKB/Swiss-Prot;Acc:Q39204]	Environmental Information Processing	Signal transduction	ko04075//Plant hormone signal transduction	GO:0005622//intracellular;GO:0043231//intracellular membrane-bounded organelle;GO:0044424//intracellular part;GO:0043227//membrane-bounded organelle;GO:0044464//cell part;GO:0005623//cell;GO:0043226//organelle;GO:0043229//intracellular organelle;GO:0005634//nucleus	GO:0005515//protein binding;GO:1901363//heterocyclic compound binding;GO:0005488//binding;GO:0003676//nucleic acid binding;GO:0097159//organic cyclic compound binding;GO:0003677//DNA binding;GO:0001071//nucleic acid binding transcription factor activity;GO:0003700//sequence-specific DNA binding transcription factor activity;GO:0046983//protein dimerization activity	GO:0048583//regulation of response to stimulus;GO:0001101//response to acid chemical;GO:0009987//cellular process;GO:0019438//aromatic compound biosynthetic process;GO:0044700//single organism signaling;GO:0007154//cell communication;GO:0043620//regulation of DNA-templated transcription in response to stress;GO:0090304//nucleic acid metabolic process;GO:0002831//regulation of response to biotic s…
Gh_A12G1893	7.64	8.7	7.23	7.81	8.89	11.41	16.14	13.41	13.72	6.09	4.82	5.23	6.51	7.91	7.4	5.25	8.86	8.53	254.13	298.32	216.14	243.58	354.81	364.27	575.66	380.19	416.79	208.76	131.16	167.78	251.78	226.26	192.59	169.19	287.35	257.56	Gh_A12G1893	Gh_A12G1893	Transcription factor MYC2 [Source:UniProtKB/Swiss-Prot;Acc:Q39204]	Environmental Information Processing	Signal transduction	ko04075//Plant hormone signal transduction	GO:0005622//intracellular;GO:0043231//intracellular membrane-bounded organelle;GO:0044424//intracellular part;GO:0043227//membrane-bounded organelle;GO:0044464//cell part;GO:0005623//cell;GO:0043226//organelle;GO:0043229//intracellular organelle;GO:0005634//nucleus	GO:0005515//protein binding;GO:1901363//heterocyclic compound binding;GO:0005488//binding;GO:0003676//nucleic acid binding;GO:0097159//organic cyclic compound binding;GO:0003677//DNA binding;GO:0001071//nucleic acid binding transcription factor activity;GO:0003700//sequence-specific DNA binding transcription factor activity;GO:0046983//protein dimerization activity	GO:0048583//regulation of response to stimulus;GO:0001101//response to acid chemical;GO:0009987//cellular process;GO:0019438//aromatic compound biosynthetic process;GO:0044700//single organism signaling;GO:0007154//cell communication;GO:0043620//regulation of DNA-templated transcription in response to stress;GO:0090304//nucleic acid metabolic process;GO:0002831//regulation of response to biotic s…
Gh_D08G1707	182.57	215.7	137.93	172.23	273.34	314.05	347.6	314.54	318.23	129.72	100.93	112.06	177.92	228.19	228.67	224.67	180.59	224.65	6328.25	7702.08	4297.29	5596.44	11369.2	10447.1	12911.6	9287.21	10073.6	4634.54	2859.15	3748.38	7163.91	6798.19	6198.25	7537.6	6104.38	7062.53	Gh_D08G1707	Gh_D08G1707	Transcription factor MYC2 [Source:UniProtKB/Swiss-Prot;Acc:Q39204]	Environmental Information Processing	Signal transduction	ko04075//Plant hormone signal transduction	GO:0005622//intracellular;GO:0043231//intracellular membrane-bounded organelle;GO:0044424//intracellular part;GO:0043227//membrane-bounded organelle;GO:0044464//cell part;GO:0005623//cell;GO:0043226//organelle;GO:0043229//intracellular organelle;GO:0005634//nucleus	GO:0005515//protein binding;GO:1901363//heterocyclic compound binding;GO:0005488//binding;GO:0003676//nucleic acid binding;GO:0097159//organic cyclic compound binding;GO:0003677//DNA binding;GO:0001071//nucleic acid binding transcription factor activity;GO:0003700//sequence-specific DNA binding transcription factor activity;GO:0046983//protein dimerization activity	GO:0048583//regulation of response to stimulus;GO:0001101//response to acid chemical;GO:0009987//cellular process;GO:0019438//aromatic compound biosynthetic process;GO:0044700//single organism signaling;GO:0007154//cell communication;GO:0043620//regulation of DNA-templated transcription in response to stress;GO:0090304//nucleic acid metabolic process;GO:0002831//regulation of response to biotic s…
Gh_D09G1895	9.16	8.26	6.13	8.98	10.77	10.52	17.05	15.89	16.5	7.52	7.12	8.14	10.85	13.03	11.8	9.17	11.86	11.88	312.24	290.24	187.98	286.88	440.55	344.15	622.86	461.6	513.64	264.16	198.48	267.85	429.91	381.94	314.68	302.78	394.46	367.53	Gh_D09G1895	Gh_D09G1895	Transcription factor MYC2 [Source:UniProtKB/Swiss-Prot;Acc:Q39204]	Environmental Information Processing	Signal transduction	ko04075//Plant hormone signal transduction	GO:0005622//intracellular;GO:0043231//intracellular membrane-bounded organelle;GO:0044424//intracellular part;GO:0043227//membrane-bounded organelle;GO:0044464//cell part;GO:0005623//cell;GO:0043226//organelle;GO:0043229//intracellular organelle;GO:0005634//nucleus	GO:0005515//protein binding;GO:1901363//heterocyclic compound binding;GO:0005488//binding;GO:0003676//nucleic acid binding;GO:0097159//organic cyclic compound binding;GO:0003677//DNA binding;GO:0001071//nucleic acid binding transcription factor activity;GO:0003700//sequence-specific DNA binding transcription factor activity;GO:0046983//protein dimerization activity	GO:0048583//regulation of response to stimulus;GO:0001101//response to acid chemical;GO:0009987//cellular process;GO:0019438//aromatic compound biosynthetic process;GO:0044700//single organism signaling;GO:0007154//cell communication;GO:0043620//regulation of DNA-templated transcription in response to stress;GO:0090304//nucleic acid metabolic process;GO:0002831//regulation of response to biotic s…
Gh_D12G1161	0.3	0.44	0.17	0	0.63	0	0.14	0.54	0.17	1.03	0.93	2.2	0.39	0.18	1.75	0.63	0.31	0.17	2	3	1	0	5	0	1	3	1	7	5	14	3	1	9	4	2	1	Gh_D12G1161	Gh_D12G1161	Transcription factor MYC2 [Source:UniProtKB/Swiss-Prot;Acc:Q39204]	Environmental Information Processing	Signal transduction	ko04075//Plant hormone signal transduction	GO:0005622//intracellular;GO:0043231//intracellular membrane-bounded organelle;GO:0044424//intracellular part;GO:0043227//membrane-bounded organelle;GO:0044464//cell part;GO:0005623//cell;GO:0043226//organelle;GO:0043229//intracellular organelle;GO:0005634//nucleus	GO:0005515//protein binding;GO:1901363//heterocyclic compound binding;GO:0005488//binding;GO:0003676//nucleic acid binding;GO:0097159//organic cyclic compound binding;GO:0003677//DNA binding;GO:0001071//nucleic acid binding transcription factor activity;GO:0003700//sequence-specific DNA binding transcription factor activity;GO:0046983//protein dimerization activity	GO:0048583//regulation of response to stimulus;GO:0001101//response to acid chemical;GO:0009987//cellular process;GO:0019438//aromatic compound biosynthetic process;GO:0044700//single organism signaling;GO:0007154//cell communication;GO:0043620//regulation of DNA-templated transcription in response to stress;GO:0090304//nucleic acid metabolic process;GO:0002831//regulation of response to biotic s…
Gh_D12G2074	9.91	10.23	6.85	10.92	13.22	14.52	19.69	17.92	18.65	5.26	5.09	6.61	7.86	9.3	8.08	8.91	10.49	10.3	329.88	350.68	204.86	340.76	527.88	463.73	701.94	507.81	566.65	180.24	138.45	212.19	303.65	266.04	210.31	286.94	340.52	310.76	Gh_D12G2074	Gh_D12G2074	Transcription factor MYC2 [Source:UniProtKB/Swiss-Prot;Acc:Q39204]	Environmental Information Processing	Signal transduction	ko04075//Plant hormone signal transduction	GO:0005622//intracellular;GO:0043231//intracellular membrane-bounded organelle;GO:0044424//intracellular part;GO:0043227//membrane-bounded organelle;GO:0044464//cell part;GO:0005623//cell;GO:0043226//organelle;GO:0043229//intracellular organelle;GO:0005634//nucleus	GO:0005515//protein binding;GO:1901363//heterocyclic compound binding;GO:0005488//binding;GO:0003676//nucleic acid binding;GO:0097159//organic cyclic compound binding;GO:0003677//DNA binding;GO:0001071//nucleic acid binding transcription factor activity;GO:0003700//sequence-specific DNA binding transcription factor activity;GO:0046983//protein dimerization activity	GO:0048583//regulation of response to stimulus;GO:0001101//response to acid chemical;GO:0009987//cellular process;GO:0019438//aromatic compound biosynthetic process;GO:0044700//single organism signaling;GO:0007154//cell communication;GO:0043620//regulation of DNA-templated transcription in response to stress;GO:0090304//nucleic acid metabolic process;GO:0002831//regulation of response to biotic s…
Gh_Sca038875G01	0	0	0	0	0	0.37	0	0	0.51	0	0.19	0	0	0	1.41	0	0	0	0	0	0	0	0	5.74	0	0	7.55	0	2.48	0	0	0	17.74	0	0	0	Gh_Sca038875G01	Gh_Sca038875G01	Transcription factor MYC2 [Source:UniProtKB/Swiss-Prot;Acc:Q39204]	Environmental Information Processing	Signal transduction	ko04075//Plant hormone signal transduction	GO:0005622//intracellular;GO:0043231//intracellular membrane-bounded organelle;GO:0044424//intracellular part;GO:0043227//membrane-bounded organelle;GO:0044464//cell part;GO:0005623//cell;GO:0043226//organelle;GO:0043229//intracellular organelle;GO:0005634//nucleus	GO:0005515//protein binding;GO:1901363//heterocyclic compound binding;GO:0005488//binding;GO:0003676//nucleic acid binding;GO:0097159//organic cyclic compound binding;GO:0003677//DNA binding;GO:0001071//nucleic acid binding transcription factor activity;GO:0003700//sequence-specific DNA binding transcription factor activity;GO:0046983//protein dimerization activity	GO:0048583//regulation of response to stimulus;GO:0001101//response to acid chemical;GO:0009987//cellular process;GO:0019438//aromatic compound biosynthetic process;GO:0044700//single organism signaling;GO:0007154//cell communication;GO:0043620//regulation of DNA-templated transcription in response to stress;GO:0090304//nucleic acid metabolic process;GO:0002831//regulation of response to biotic s…
XLOC_018649	3.98	1.47	1.33	3.05	1.52	1.65	2.37	2.34	1.82	1.23	2.64	3.04	2.26	2.05	2.05	1.07	1.63	1.49	50	19	15	36	23	20	32	25	20.93	16	27	37	33	22	20	13	20	17	MYC2	XLOC_018649	Transcription factor MYC2 [Source:UniProtKB/Swiss-Prot;Acc:Q39204]	Environmental Information Processing	Signal transduction	ko04075//Plant hormone signal transduction	GO:0005622//intracellular;GO:0043231//intracellular membrane-bounded organelle;GO:0044424//intracellular part;GO:0043227//membrane-bounded organelle;GO:0044464//cell part;GO:0005623//cell;GO:0043226//organelle;GO:0043229//intracellular organelle;GO:0005634//nucleus	GO:0005515//protein binding;GO:1901363//heterocyclic compound binding;GO:0005488//binding;GO:0003676//nucleic acid binding;GO:0097159//organic cyclic compound binding;GO:0003677//DNA binding;GO:0001071//nucleic acid binding transcription factor activity;GO:0003700//sequence-specific DNA binding transcription factor activity;GO:0046983//protein dimerization activity	GO:0048583//regulation of response to stimulus;GO:0001101//response to acid chemical;GO:0009987//cellular process;GO:0019438//aromatic compound biosynthetic process;GO:0044700//single organism signaling;GO:0007154//cell communication;GO:0043620//regulation of DNA-templated transcription in response to stress;GO:0090304//nucleic acid metabolic process;GO:0002831//regulation of response to biotic s…
XLOC_028524	4.16	2.93	3.63	2.96	3.13	3.15	2.44	1.53	1.52	5.78	5.39	4.9	2.11	2.47	1.25	2.78	3.35	1.26	51	37	40	34	46	37	32	16	17	73	54	58	30	26	12	33	40	14	MYC2	XLOC_028524	Transcription factor MYC2 [Source:UniProtKB/Swiss-Prot;Acc:Q39204]	Environmental Information Processing	Signal transduction	ko04075//Plant hormone signal transduction	GO:0005622//intracellular;GO:0043231//intracellular membrane-bounded organelle;GO:0044424//intracellular part;GO:0043227//membrane-bounded organelle;GO:0044464//cell part;GO:0005623//cell;GO:0043226//organelle;GO:0043229//intracellular organelle;GO:0005634//nucleus	GO:0005515//protein binding;GO:1901363//heterocyclic compound binding;GO:0005488//binding;GO:0003676//nucleic acid binding;GO:0097159//organic cyclic compound binding;GO:0003677//DNA binding;GO:0001071//nucleic acid binding transcription factor activity;GO:0003700//sequence-specific DNA binding transcription factor activity;GO:0046983//protein dimerization activity	GO:0048583//regulation of response to stimulus;GO:0001101//response to acid chemical;GO:0009987//cellular process;GO:0019438//aromatic compound biosynthetic process;GO:0044700//single organism signaling;GO:0007154//cell communication;GO:0043620//regulation of DNA-templated transcription in response to stress;GO:0090304//nucleic acid metabolic process;GO:0002831//regulation of response to biotic s…
XLOC_030334	1.61	2.61	2.69	1.58	3.02	2.8	1.76	3.63	1.03	2.48	2.14	3.76	1.62	2.35	0.86	2.36	1.52	0.44	12	20	18	11	27	20	14	23	7	19	13	27	14	15	5	17	11	3	MYC2	XLOC_030334	Transcription factor MYC2 [Source:UniProtKB/Swiss-Prot;Acc:Q39204]	Environmental Information Processing	Signal transduction	ko04075//Plant hormone signal transduction	GO:0005622//intracellular;GO:0043231//intracellular membrane-bounded organelle;GO:0044424//intracellular part;GO:0043227//membrane-bounded organelle;GO:0044464//cell part;GO:0005623//cell;GO:0043226//organelle;GO:0043229//intracellular organelle;GO:0005634//nucleus	GO:0005515//protein binding;GO:1901363//heterocyclic compound binding;GO:0005488//binding;GO:0003676//nucleic acid binding;GO:0097159//organic cyclic compound binding;GO:0003677//DNA binding;GO:0001071//nucleic acid binding transcription factor activity;GO:0003700//sequence-specific DNA binding transcription factor activity;GO:0046983//protein dimerization activity	GO:0048583//regulation of response to stimulus;GO:0001101//response to acid chemical;GO:0009987//cellular process;GO:0019438//aromatic compound biosynthetic process;GO:0044700//single organism signaling;GO:0007154//cell communication;GO:0043620//regulation of DNA-templated transcription in response to stress;GO:0090304//nucleic acid metabolic process;GO:0002831//regulation of response to biotic s…
XLOC_071964	4.19	3.97	3.41	4.9	4.6	3.51	3.72	5.52	3.47	5.75	4	4.76	3.34	3.45	3	2.32	3.14	2.03	41	40	30	45	54	33	39	46	31	58	32	45	38	29	23	22	30	18	MYC2	XLOC_071964	Transcription factor MYC2 [Source:UniProtKB/Swiss-Prot;Acc:Q39204]	Environmental Information Processing	Signal transduction	ko04075//Plant hormone signal transduction	GO:0005622//intracellular;GO:0043231//intracellular membrane-bounded organelle;GO:0044424//intracellular part;GO:0043227//membrane-bounded organelle;GO:0044464//cell part;GO:0005623//cell;GO:0043226//organelle;GO:0043229//intracellular organelle;GO:0005634//nucleus	GO:0005515//protein binding;GO:1901363//heterocyclic compound binding;GO:0005488//binding;GO:0003676//nucleic acid binding;GO:0097159//organic cyclic compound binding;GO:0003677//DNA binding;GO:0001071//nucleic acid binding transcription factor activity;GO:0003700//sequence-specific DNA binding transcription factor activity;GO:0046983//protein dimerization activity	GO:0048583//regulation of response to stimulus;GO:0001101//response to acid chemical;GO:0009987//cellular process;GO:0019438//aromatic compound biosynthetic process;GO:0044700//single organism signaling;GO:0007154//cell communication;GO:0043620//regulation of DNA-templated transcription in response to stress;GO:0090304//nucleic acid metabolic process;GO:0002831//regulation of response to biotic s…
Gh_A01G1514	0.12	0.12	0.27	0.26	0.2	0.5	1.57	0.85	0.39	0	0	0	0	0	0	0	0	0.53	1	1	2	2	2	4	14	6	3	0	0	0	0	0	0	0	0	4	Gh_A01G1514	Gh_A01G1514	CAP (Cysteine-rich secretory proteins, Antigen 5, and Pathogenesis-related 1 protein) superfamily protein [Source:TAIR;Acc:AT4G33720]	Organismal Systems;Environmental Information Processing	Signal transduction;Environmental adaptation	ko04075//Plant hormone signal transduction;ko04626//Plant-pathogen interaction	GO:0005576//extracellular region	GO:0003674//molecular_function	GO:0008150//biological_process
Gh_A01G1515	0	0	0	0	0	0	0	0	0	0	0	0	0	0	0	0	0	0	0	0	0	0	0	0	0	0	0	0	0	0	0	0	0	0	0	0	Gh_A01G1515	Gh_A01G1515	Pathogenesis-related protein 1 [Source:UniProtKB/Swiss-Prot;Acc:Q9ZNS4]	Organismal Systems;Environmental Information Processing	Signal transduction;Environmental adaptation	ko04075//Plant hormone signal transduction;ko04626//Plant-pathogen interaction	GO:0005576//extracellular region	GO:0003674//molecular_function	GO:0098542//defense response to other organism;GO:0045087//innate immune response;GO:0009719//response to endogenous stimulus;GO:0009751//response to salicylic acid;GO:0042221//response to chemical;GO:0001101//response to acid chemical;GO:0009605//response to external stimulus;GO:0009725//response to hormone;GO:0009617//response to bacterium;GO:0006955//immune response;GO:0009814//defense respons…
Gh_A08G1611	0	0	0	0	0	0	0	0	0	0	0	0	0	0	0	0	0	0	0	0	0	0	0	0	0	0	0	0	0	0	0	0	0	0	0	0	Gh_A08G1611	Gh_A08G1611	CAP (Cysteine-rich secretory proteins, Antigen 5, and Pathogenesis-related 1 protein) superfamily protein [Source:TAIR;Acc:AT3G19690]	Organismal Systems;Environmental Information Processing	Signal transduction;Environmental adaptation	ko04075//Plant hormone signal transduction;ko04626//Plant-pathogen interaction	GO:0005576//extracellular region	GO:0003674//molecular_function	GO:0008150//biological_process
Gh_A12G0274	7.75	6.14	5.44	4.96	5.17	6.09	6.01	7.14	7.18	4.86	2.04	4.2	2.26	7.63	3.05	4.31	0.37	1.71	65	53	41	39	52	49	54	51	55	42	14	34	22	55	20	35	3	13	Gh_A12G0274	Gh_A12G0274	Pathogenesis-related protein 1 [Source:UniProtKB/Swiss-Prot;Acc:P33154]	Organismal Systems;Environmental Information Processing	Signal transduction;Environmental adaptation	ko04075//Plant hormone signal transduction;ko04626//Plant-pathogen interaction	GO:0005623//cell;GO:0005576//extracellular region;GO:0005618//cell wall;GO:0030312//external encapsulating structure;GO:0048046//apoplast;GO:0071944//cell periphery;GO:0044464//cell part	-	GO:0002376//immune system process;GO:0009414//response to water deprivation;GO:0042221//response to chemical;GO:0051704//multi-organism process;GO:0001101//response to acid chemical;GO:0098542//defense response to other organism;GO:0010243//response to organonitrogen compound;GO:0006952//defense response;GO:0006955//immune response;GO:0033273//response to vitamin;GO:1901700//response to oxygen-co…
Gh_D01G1757	0.47	0	0.26	0.13	0.49	0	0	0	0.26	0	0.15	0.37	0	0.41	0.3	0	0	0	4	0	2	1	5	0	0	0	2	0	1	3	0	3	2	0	0	0	Gh_D01G1757	Gh_D01G1757	CAP (Cysteine-rich secretory proteins, Antigen 5, and Pathogenesis-related 1 protein) superfamily protein [Source:TAIR;Acc:AT4G33720]	Organismal Systems;Environmental Information Processing	Signal transduction;Environmental adaptation	ko04075//Plant hormone signal transduction;ko04626//Plant-pathogen interaction	GO:0005576//extracellular region	GO:0003674//molecular_function	GO:0008150//biological_process
Gh_D01G1758	0	0	0	0	0	0	0	0	0	0	0	0	0	0	0	0	0	0	0	0	0	0	0	0	0	0	0	0	0	0	0	0	0	0	0	0	Gh_D01G1758	Gh_D01G1758	CAP (Cysteine-rich secretory proteins, Antigen 5, and Pathogenesis-related 1 protein) superfamily protein [Source:TAIR;Acc:AT3G19690]	Organismal Systems;Environmental Information Processing	Signal transduction;Environmental adaptation	ko04075//Plant hormone signal transduction;ko04626//Plant-pathogen interaction	GO:0005576//extracellular region	GO:0003674//molecular_function	GO:0008150//biological_process
Gh_D08G1920	0	0	0	0	0	0	0	0	0	0	0	0	0	0	0	0	0	0	0	0	0	0	0	0	0	0	0	0	0	0	0	0	0	0	0	0	Gh_D08G1920	Gh_D08G1920	CAP (Cysteine-rich secretory proteins, Antigen 5, and Pathogenesis-related 1 protein) superfamily protein [Source:TAIR;Acc:AT3G19690]	Organismal Systems;Environmental Information Processing	Signal transduction;Environmental adaptation	ko04075//Plant hormone signal transduction;ko04626//Plant-pathogen interaction	GO:0005576//extracellular region	GO:0003674//molecular_function	GO:0008150//biological_process
Gh_D08G1921	0	0	0	0	0	0	0	0	0	0	0	0	0	0	0	0	0	0	0	0	0	0	0	0	0	0	0	0	0	0	0	0	0	0	0	0	Gh_D08G1921	Gh_D08G1921	CAP (Cysteine-rich secretory proteins, Antigen 5, and Pathogenesis-related 1 protein) superfamily protein [Source:TAIR;Acc:AT3G19690]	Organismal Systems;Environmental Information Processing	Signal transduction;Environmental adaptation	ko04075//Plant hormone signal transduction;ko04626//Plant-pathogen interaction	GO:0005576//extracellular region	GO:0003674//molecular_function	GO:0008150//biological_process
Gh_D09G0971	0.63	0	0.12	0.11	0.35	100.87	0.1	0	0	0.61	0.13	0.11	0.18	0.49	0.94	0.43	0.32	0.12	6	0	1	1	4	921	1	0	0	6	1	1	2	4	7	4	3	1	Gh_D09G0971	Gh_D09G0971	Pathogenesis-related protein 1 [Source:UniProtKB/Swiss-Prot;Acc:P33154]	Organismal Systems;Environmental Information Processing	Signal transduction;Environmental adaptation	ko04075//Plant hormone signal transduction;ko04626//Plant-pathogen interaction	GO:0005623//cell;GO:0005576//extracellular region;GO:0005618//cell wall;GO:0030312//external encapsulating structure;GO:0048046//apoplast;GO:0071944//cell periphery;GO:0044464//cell part	-	GO:0002376//immune system process;GO:0009414//response to water deprivation;GO:0042221//response to chemical;GO:0051704//multi-organism process;GO:0001101//response to acid chemical;GO:0098542//defense response to other organism;GO:0010243//response to organonitrogen compound;GO:0006952//defense response;GO:0006955//immune response;GO:0033273//response to vitamin;GO:1901700//response to oxygen-co…
Gh_D12G0395	0.81	1.5	1.34	0.37	1	0.6	1.04	0.33	0.75	4.77	0.97	1.25	0.15	4.3	0	2.67	0	3.07	4.73	9	7	2	7	3.33	6.46	1.63	4	28.59	4.6	7	1	21.47	0	15	0	16.18	Gh_D12G0395	Gh_D12G0395	Pathogenesis-related protein 1 [Source:UniProtKB/Swiss-Prot;Acc:P33154]	Organismal Systems;Environmental Information Processing	Signal transduction;Environmental adaptation	ko04075//Plant hormone signal transduction;ko04626//Plant-pathogen interaction	GO:0005623//cell;GO:0005576//extracellular region;GO:0005618//cell wall;GO:0030312//external encapsulating structure;GO:0048046//apoplast;GO:0071944//cell periphery;GO:0044464//cell part	-	GO:0002376//immune system process;GO:0009414//response to water deprivation;GO:0042221//response to chemical;GO:0051704//multi-organism process;GO:0001101//response to acid chemical;GO:0098542//defense response to other organism;GO:0010243//response to organonitrogen compound;GO:0006952//defense response;GO:0006955//immune response;GO:0033273//response to vitamin;GO:1901700//response to oxygen-co…
Gh_D12G2819	0.6	0	0.27	0.38	0.2	0.37	0.11	0.28	0.13	2.31	1.31	1.24	0.31	2.22	0.61	3.33	0.61	0.92	5	0	2	3	2	3	1	2	1	20	9	10	3	16	4	27	5	7	Gh_D12G2819	Gh_D12G2819	Pathogenesis-related protein 1 [Source:UniProtKB/Swiss-Prot;Acc:P33154]	Organismal Systems;Environmental Information Processing	Signal transduction;Environmental adaptation	ko04075//Plant hormone signal transduction;ko04626//Plant-pathogen interaction	GO:0005623//cell;GO:0005576//extracellular region;GO:0005618//cell wall;GO:0030312//external encapsulating structure;GO:0048046//apoplast;GO:0071944//cell periphery;GO:0044464//cell part	-	GO:0002376//immune system process;GO:0009414//response to water deprivation;GO:0042221//response to chemical;GO:0051704//multi-organism process;GO:0001101//response to acid chemical;GO:0098542//defense response to other organism;GO:0010243//response to organonitrogen compound;GO:0006952//defense response;GO:0006955//immune response;GO:0033273//response to vitamin;GO:1901700//response to oxygen-co…
Gh_D13G0475	0	0	0	0	0	0	0	0	0	0	0	0	0	0	0	0	0	0	0	0	0	0	0	0	0	0	0	0	0	0	0	0	0	0	0	0	Gh_D13G0475	Gh_D13G0475	Pathogenesis-related protein 1 [Source:UniProtKB/Swiss-Prot;Acc:Q9ZNS4]	Organismal Systems;Environmental Information Processing	Signal transduction;Environmental adaptation	ko04075//Plant hormone signal transduction;ko04626//Plant-pathogen interaction	GO:0005576//extracellular region	GO:0003674//molecular_function	GO:0098542//defense response to other organism;GO:0045087//innate immune response;GO:0009719//response to endogenous stimulus;GO:0009751//response to salicylic acid;GO:0042221//response to chemical;GO:0001101//response to acid chemical;GO:0009605//response to external stimulus;GO:0009725//response to hormone;GO:0009617//response to bacterium;GO:0006955//immune response;GO:0009814//defense respons…
Gh_Sca004823G01	0.82	0	0	0	0	0.5	0.19	0.21	0	0.18	0.23	0	0	0.85	0.34	0	0.27	0.41	6.27	0	0	0	0	3.67	1.54	1.37	0	1.41	1.4	0	0	5.53	2	0	2	2.82	Gh_Sca004823G01	Gh_Sca004823G01	Pathogenesis-related protein 1 [Source:UniProtKB/Swiss-Prot;Acc:P33154]	Organismal Systems;Environmental Information Processing	Signal transduction;Environmental adaptation	ko04075//Plant hormone signal transduction;ko04626//Plant-pathogen interaction	GO:0005623//cell;GO:0005576//extracellular region;GO:0005618//cell wall;GO:0030312//external encapsulating structure;GO:0048046//apoplast;GO:0071944//cell periphery;GO:0044464//cell part	-	GO:0002376//immune system process;GO:0009414//response to water deprivation;GO:0042221//response to chemical;GO:0051704//multi-organism process;GO:0001101//response to acid chemical;GO:0098542//defense response to other organism;GO:0010243//response to organonitrogen compound;GO:0006952//defense response;GO:0006955//immune response;GO:0033273//response to vitamin;GO:1901700//response to oxygen-co…
Gh_A02G0683	2.65	2.44	2.77	1.47	1.62	1.67	2.52	1.85	1.56	4.39	2.85	3.01	2.04	2.51	2.8	0.87	1.4	1.96	32.55	30.93	30.64	16.96	23.89	19.69	33.25	19.32	17.54	55.66	28.6	35.65	29.13	26.49	26.87	10.4	16.81	21.8	Gh_A02G0683	Gh_A02G0683	Coronatine-insensitive protein 1 [Source:UniProtKB/Swiss-Prot;Acc:O04197]	Environmental Information Processing	Signal transduction	ko04075//Plant hormone signal transduction	-	-	GO:0009909//regulation of flower development;GO:0048438//floral whorl development;GO:0009867//jasmonic acid mediated signaling pathway;GO:0009791//post-embryonic development;GO:0031347//regulation of defense response;GO:0009617//response to bacterium;GO:0006950//response to stress;GO:0048731//system development;GO:0006955//immune response;GO:0009753//response to jasmonic acid;GO:0051239//regulati…
Gh_A02G0684	0.84	0.81	0.62	0.15	0.58	0	0	0.16	0	0.54	1.2	0.58	0.6	0	0.54	0	0.72	0	6	6	4	1	5	0	0	1	0	4	7	4	5	0	3	0	5	0	Gh_A02G0684	Gh_A02G0684	Coronatine-insensitive protein 1 [Source:UniProtKB/Swiss-Prot;Acc:O04197]	Environmental Information Processing	Signal transduction	ko04075//Plant hormone signal transduction	-	-	GO:0009909//regulation of flower development;GO:0048438//floral whorl development;GO:0009867//jasmonic acid mediated signaling pathway;GO:0009791//post-embryonic development;GO:0031347//regulation of defense response;GO:0009617//response to bacterium;GO:0006950//response to stress;GO:0048731//system development;GO:0006955//immune response;GO:0009753//response to jasmonic acid;GO:0051239//regulati…
Gh_A02G0685	2.15	1.07	0.2	1.57	0.31	0.76	1.54	0.86	0.8	2.14	0.9	0.95	0.16	0.21	1.41	1.33	0.38	0.61	11.71	6	1	8	2	4	9	4	4	12	4	5	1	1	6	7	2	3	Gh_A02G0685	Gh_A02G0685	Coronatine-insensitive protein 1 [Source:UniProtKB/Swiss-Prot;Acc:O04197]	Environmental Information Processing	Signal transduction	ko04075//Plant hormone signal transduction	-	-	GO:0009909//regulation of flower development;GO:0048438//floral whorl development;GO:0009867//jasmonic acid mediated signaling pathway;GO:0009791//post-embryonic development;GO:0031347//regulation of defense response;GO:0009617//response to bacterium;GO:0006950//response to stress;GO:0048731//system development;GO:0006955//immune response;GO:0009753//response to jasmonic acid;GO:0051239//regulati…
Gh_A05G2749	6.91	9.19	12.54	10.9	6.14	5.2	5.12	5.71	7.16	6.38	6.97	6.08	6.73	5.4	4.68	6.8	5.03	6.68	209.67	287.28	342.13	310	223.48	151.31	166.36	147.62	198.42	199.51	172.93	177.9	237.28	140.91	111.16	199.69	148.75	183.94	Gh_A05G2749	Gh_A05G2749	Coronatine-insensitive protein 1 [Source:UniProtKB/Swiss-Prot;Acc:O04197]	Environmental Information Processing	Signal transduction	ko04075//Plant hormone signal transduction	-	-	GO:0009909//regulation of flower development;GO:0048438//floral whorl development;GO:0009867//jasmonic acid mediated signaling pathway;GO:0009791//post-embryonic development;GO:0031347//regulation of defense response;GO:0009617//response to bacterium;GO:0006950//response to stress;GO:0048731//system development;GO:0006955//immune response;GO:0009753//response to jasmonic acid;GO:0051239//regulati…
Gh_D02G0731	2.28	1.97	2.34	1.29	2.51	1.65	2.37	3.25	3.24	0.68	0.78	0.82	0.56	0.7	0.26	0.59	0.21	0.66	69.74	62.07	64.36	37.04	92.11	48.31	77.75	84.68	90.46	21.34	19.4	24.35	19.87	18.51	6.13	17.6	6.19	18.2	Gh_D02G0731	Gh_D02G0731	Coronatine-insensitive protein 1 [Source:UniProtKB/Swiss-Prot;Acc:O04197]	Environmental Information Processing	Signal transduction	ko04075//Plant hormone signal transduction	-	-	GO:0009909//regulation of flower development;GO:0048438//floral whorl development;GO:0009867//jasmonic acid mediated signaling pathway;GO:0009791//post-embryonic development;GO:0031347//regulation of defense response;GO:0009617//response to bacterium;GO:0006950//response to stress;GO:0048731//system development;GO:0006955//immune response;GO:0009753//response to jasmonic acid;GO:0051239//regulati…
Gh_D04G0642	7.73	9.88	14.06	10.9	6.99	6.73	7.41	7.5	7.36	6.36	7.32	8.34	8.73	5.89	5.45	5.3	5.94	5.51	235.33	309.72	384.87	311	255.52	196.69	241.64	194.38	204.58	199.49	182.07	245.1	308.72	154.09	129.84	156.31	176.25	152.06	Gh_D04G0642	Gh_D04G0642	Coronatine-insensitive protein 1 [Source:UniProtKB/Swiss-Prot;Acc:O04197]	Environmental Information Processing	Signal transduction	ko04075//Plant hormone signal transduction	-	-	GO:0009909//regulation of flower development;GO:0048438//floral whorl development;GO:0009867//jasmonic acid mediated signaling pathway;GO:0009791//post-embryonic development;GO:0031347//regulation of defense response;GO:0009617//response to bacterium;GO:0006950//response to stress;GO:0048731//system development;GO:0006955//immune response;GO:0009753//response to jasmonic acid;GO:0051239//regulati…
Gh_Sca006609G01	9.73	9.15	8.19	8.84	8.94	6.65	8.73	8.52	7.98	8.83	9.97	9.14	8.92	6.07	5.51	7.54	8.42	8.74	295.72	286.34	223.77	251.88	326.23	193.95	284.32	220.55	221.4	276.71	247.75	268.21	314.77	158.58	130.96	221.75	249.58	240.98	Gh_Sca006609G01	Gh_Sca006609G01	Coronatine-insensitive protein 1 [Source:UniProtKB/Swiss-Prot;Acc:O04197]	Environmental Information Processing	Signal transduction	ko04075//Plant hormone signal transduction	-	-	GO:0009909//regulation of flower development;GO:0048438//floral whorl development;GO:0009867//jasmonic acid mediated signaling pathway;GO:0009791//post-embryonic development;GO:0031347//regulation of defense response;GO:0009617//response to bacterium;GO:0006950//response to stress;GO:0048731//system development;GO:0006955//immune response;GO:0009753//response to jasmonic acid;GO:0051239//regulati…
XLOC_029868	1.12	1.87	1.02	0.43	1.69	0.85	0.66	1.19	0.56	1.58	1.12	0.74	0.96	1.42	0.65	0.42	0.83	1.12	11	19	9	4	20	8	7	10	5	16	9	7	11	12	5	4	8	10	COI1	XLOC_029868	Coronatine-insensitive protein 1 [Source:UniProtKB/Swiss-Prot;Acc:O04197]	Environmental Information Processing	Signal transduction	ko04075//Plant hormone signal transduction	-	-	GO:0009909//regulation of flower development;GO:0048438//floral whorl development;GO:0009867//jasmonic acid mediated signaling pathway;GO:0009791//post-embryonic development;GO:0031347//regulation of defense response;GO:0009617//response to bacterium;GO:0006950//response to stress;GO:0048731//system development;GO:0006955//immune response;GO:0009753//response to jasmonic acid;GO:0051239//regulati…
XLOC_076264	6.62	5.09	5.36	5.24	4.65	4.05	4.41	4.58	4.58	7.35	5.35	5.57	6.08	4.5	3.97	3.43	6.03	6.39	194.28	153.66	141.23	144.12	163.77	114.05	138.68	114.45	122.6	222.29	128.25	157.79	207.23	113.42	91.04	97.25	172.42	170.02	COI1	XLOC_076264	Coronatine-insensitive protein 1 [Source:UniProtKB/Swiss-Prot;Acc:O04197]	Environmental Information Processing	Signal transduction	ko04075//Plant hormone signal transduction	-	-	GO:0009909//regulation of flower development;GO:0048438//floral whorl development;GO:0009867//jasmonic acid mediated signaling pathway;GO:0009791//post-embryonic development;GO:0031347//regulation of defense response;GO:0009617//response to bacterium;GO:0006950//response to stress;GO:0048731//system development;GO:0006955//immune response;GO:0009753//response to jasmonic acid;GO:0051239//regulati…
XLOC_078964	0.82	1.19	0.81	0.97	0.57	0.28	1.14	1.28	0.85	0.48	0.44	0.66	0.47	1.27	0.7	0.89	0.56	0.6	18	27	16	20	15	6	27	24	17	11	8	14	12	24	12	19	12	12	COI1	XLOC_078964	Coronatine-insensitive protein 1 [Source:UniProtKB/Swiss-Prot;Acc:O04197]	Environmental Information Processing	Signal transduction	ko04075//Plant hormone signal transduction	-	-	GO:0009909//regulation of flower development;GO:0048438//floral whorl development;GO:0009867//jasmonic acid mediated signaling pathway;GO:0009791//post-embryonic development;GO:0031347//regulation of defense response;GO:0009617//response to bacterium;GO:0006950//response to stress;GO:0048731//system development;GO:0006955//immune response;GO:0009753//response to jasmonic acid;GO:0051239//regulati…
Gh_A01G0153	0.28	0.27	0.41	0.1	0.22	0.58	0.26	0.65	0.71	0.63	0.36	0	0.48	0.43	0.24	0.86	0.09	0.41	3	3	4	1	2.82	6	3	6	7	7	3.15	0	6	4	2	9	1	4	Gh_A01G0153	Gh_A01G0153	-	Environmental Information Processing	Signal transduction	ko04075//Plant hormone signal transduction	GO:0005623//cell;GO:0043227//membrane-bounded organelle;GO:0005634//nucleus;GO:0044424//intracellular part;GO:0043226//organelle;GO:0044464//cell part;GO:0043231//intracellular membrane-bounded organelle;GO:0005622//intracellular;GO:0043229//intracellular organelle	GO:0005488//binding;GO:0046983//protein dimerization activity;GO:0005515//protein binding;GO:0042802//identical protein binding;GO:0042803//protein homodimerization activity	GO:0034641//cellular nitrogen compound metabolic process;GO:0050776//regulation of immune response;GO:0090304//nucleic acid metabolic process;GO:1901360//organic cyclic compound metabolic process;GO:0010646//regulation of cell communication;GO:0010033//response to organic substance;GO:0060255//regulation of macromolecule metabolic process;GO:0051171//regulation of nitrogen compound metabolic proc…
Gh_A01G1225	13.73	12.86	9.24	13.66	16.64	20.22	17.85	16.05	21.37	7.17	8.82	25.9	4.64	8.51	6.49	10.87	16.93	9.48	257	248	155.47	239.8	373.89	363.29	358	256	365.36	138.44	135	467.87	101	137	95	197	309	161	Gh_A01G1225	Gh_A01G1225	Protein TIFY 6B [Source:UniProtKB/Swiss-Prot;Acc:Q9LVI4]	Environmental Information Processing	Signal transduction	ko04075//Plant hormone signal transduction	GO:0043229//intracellular organelle;GO:0005622//intracellular;GO:0005623//cell;GO:0005634//nucleus;GO:0044464//cell part;GO:0043226//organelle;GO:0044424//intracellular part;GO:0043231//intracellular membrane-bounded organelle;GO:0043227//membrane-bounded organelle	GO:0005488//binding;GO:0042802//identical protein binding;GO:0005515//protein binding	GO:0006351//transcription, DNA-templated;GO:0031326//regulation of cellular biosynthetic process;GO:0008152//metabolic process;GO:1901576//organic substance biosynthetic process;GO:0006952//defense response;GO:0023052//signaling;GO:0044237//cellular metabolic process;GO:0009889//regulation of biosynthetic process;GO:0060255//regulation of macromolecule metabolic process;GO:0010033//response to or…
Gh_A03G1341	0.59	1.62	0.66	1.82	3.31	11.05	5.32	6.11	5.34	0.67	0.12	1.83	0.35	1.03	0.25	3.04	0.5	1.95	6	17	6	17.39	40.39	108	58	53	49.63	7	1	18	4.19	9	2	30	5	18	Gh_A03G1341	Gh_A03G1341	-	Environmental Information Processing	Signal transduction	ko04075//Plant hormone signal transduction	GO:0005623//cell;GO:0043227//membrane-bounded organelle;GO:0005634//nucleus;GO:0044424//intracellular part;GO:0043226//organelle;GO:0044464//cell part;GO:0043231//intracellular membrane-bounded organelle;GO:0005622//intracellular;GO:0043229//intracellular organelle	GO:0005488//binding;GO:0046983//protein dimerization activity;GO:0005515//protein binding;GO:0042802//identical protein binding;GO:0042803//protein homodimerization activity	GO:0034641//cellular nitrogen compound metabolic process;GO:0050776//regulation of immune response;GO:0090304//nucleic acid metabolic process;GO:1901360//organic cyclic compound metabolic process;GO:0010646//regulation of cell communication;GO:0010033//response to organic substance;GO:0060255//regulation of macromolecule metabolic process;GO:0051171//regulation of nitrogen compound metabolic proc…
Gh_A05G0260	24.69	30.55	12.84	20.14	42.83	78.69	86.47	81.27	81.02	8.61	6.12	24.25	10.07	25.44	16.71	37.6	21.1	27.22	306	390	143	234	637	936	1148.45	858	917	110	62	290	145	271	162	451	255	306	Gh_A05G0260	Gh_A05G0260	Protein TIFY 10A [Source:UniProtKB/Swiss-Prot;Acc:Q9LMA8]	Environmental Information Processing	Signal transduction	ko04075//Plant hormone signal transduction	GO:0043229//intracellular organelle;GO:0043227//membrane-bounded organelle;GO:0005623//cell;GO:0043231//intracellular membrane-bounded organelle;GO:0043226//organelle;GO:0005622//intracellular;GO:0044464//cell part;GO:0005634//nucleus;GO:0044424//intracellular part	-	GO:0044699//single-organism process;GO:0032774//RNA biosynthetic process;GO:0090304//nucleic acid metabolic process;GO:0019222//regulation of metabolic process;GO:0050794//regulation of cellular process;GO:0048856//anatomical structure development;GO:0009617//response to bacterium;GO:0001101//response to acid chemical;GO:0044237//cellular metabolic process;GO:0043170//macromolecule metabolic proc…
Gh_A05G0278	9.05	6.62	4.89	5.07	7.47	8.03	8.95	7.89	7.95	5.75	5.37	9.95	5.25	12.3	5.85	5.93	5.33	3.06	101	76.11	49.1	53	100.06	86	107.05	75.04	81.04	66.16	49	107.1	68	118	51.03	64	58.06	31	Gh_A05G0278	Gh_A05G0278	Protein TIFY 3B [Source:UniProtKB/Swiss-Prot;Acc:Q9C5K8]	Environmental Information Processing	Signal transduction	ko04075//Plant hormone signal transduction	GO:0005622//intracellular;GO:0005634//nucleus;GO:0043229//intracellular organelle;GO:0044464//cell part;GO:0043231//intracellular membrane-bounded organelle;GO:0044424//intracellular part;GO:0005623//cell;GO:0043227//membrane-bounded organelle;GO:0043226//organelle	-	GO:2001141//regulation of RNA biosynthetic process;GO:0006355//regulation of transcription, DNA-templated;GO:0031323//regulation of cellular metabolic process;GO:0090304//nucleic acid metabolic process;GO:0044271//cellular nitrogen compound biosynthetic process;GO:0016070//RNA metabolic process;GO:0006139//nucleobase-containing compound metabolic process;GO:0043170//macromolecule metabolic proces…
Gh_A05G1155	25.61	24.53	12.01	21.29	33.98	44.45	41.96	35.3	44.18	4.99	6.6	10.3	6.56	7.28	2.63	21.95	16.95	13.69	299	295	126	233	476	498	525	351	471	60	63	116	89	73	24	248	193	145	Gh_A05G1155	Gh_A05G1155	Protein TIFY 11B [Source:UniProtKB/Swiss-Prot;Acc:Q9C9E3]	Environmental Information Processing	Signal transduction	ko04075//Plant hormone signal transduction	GO:0044424//intracellular part;GO:0005634//nucleus;GO:0043231//intracellular membrane-bounded organelle;GO:0043229//intracellular organelle;GO:0043227//membrane-bounded organelle;GO:0005622//intracellular;GO:0044464//cell part;GO:0043226//organelle;GO:0005623//cell	-	GO:0006807//nitrogen compound metabolic process;GO:0006950//response to stress;GO:0065007//biological regulation;GO:0031323//regulation of cellular metabolic process;GO:0050896//response to stimulus;GO:0009725//response to hormone;GO:0009059//macromolecule biosynthetic process;GO:1903506//regulation of nucleic acid-templated transcription;GO:2000112//regulation of cellular macromolecule biosynthe…
Gh_A05G2675	45.2	39.47	34.56	37.16	43.29	36.23	23.76	25.59	23.51	38.94	37.35	48.72	38.25	41.06	35.42	38.13	42.88	32.6	848.36	763.22	583.14	653.97	975.07	652.71	478	409.25	403	753.43	573	882.43	834	662.39	520	692.72	785	555.09	Gh_A05G2675	Gh_A05G2675	Protein TIFY 6B [Source:UniProtKB/Swiss-Prot;Acc:Q9LVI4]	Environmental Information Processing	Signal transduction	ko04075//Plant hormone signal transduction	GO:0043229//intracellular organelle;GO:0005622//intracellular;GO:0005623//cell;GO:0005634//nucleus;GO:0044464//cell part;GO:0043226//organelle;GO:0044424//intracellular part;GO:0043231//intracellular membrane-bounded organelle;GO:0043227//membrane-bounded organelle	GO:0005488//binding;GO:0042802//identical protein binding;GO:0005515//protein binding	GO:0006351//transcription, DNA-templated;GO:0031326//regulation of cellular biosynthetic process;GO:0008152//metabolic process;GO:1901576//organic substance biosynthetic process;GO:0006952//defense response;GO:0023052//signaling;GO:0044237//cellular metabolic process;GO:0009889//regulation of biosynthetic process;GO:0060255//regulation of macromolecule metabolic process;GO:0010033//response to or…
Gh_A06G0705	52.97	70.51	35.45	42.3	99.18	176.77	219.72	167.39	162.24	15.44	12.71	19.84	19.06	43.9	39.2	60.45	41.05	42.85	719.14	986.18	432.61	538.44	1615.82	2303.33	3196.88	1935.92	2011.57	216	141	259.95	300.55	512.33	416.2	794.38	543.51	527.61	Gh_A06G0705	Gh_A06G0705	Protein TIFY 10A [Source:UniProtKB/Swiss-Prot;Acc:Q9LMA8]	Environmental Information Processing	Signal transduction	ko04075//Plant hormone signal transduction	GO:0043229//intracellular organelle;GO:0043227//membrane-bounded organelle;GO:0005623//cell;GO:0043231//intracellular membrane-bounded organelle;GO:0043226//organelle;GO:0005622//intracellular;GO:0044464//cell part;GO:0005634//nucleus;GO:0044424//intracellular part	-	GO:0044699//single-organism process;GO:0032774//RNA biosynthetic process;GO:0090304//nucleic acid metabolic process;GO:0019222//regulation of metabolic process;GO:0050794//regulation of cellular process;GO:0048856//anatomical structure development;GO:0009617//response to bacterium;GO:0001101//response to acid chemical;GO:0044237//cellular metabolic process;GO:0043170//macromolecule metabolic proc…
Gh_A07G0156	90.01	78.47	64.33	60.23	68.99	74.32	72.82	65.29	70.29	85.76	63.59	79.37	59.43	66.99	71.99	48.78	59.21	45.13	1060	952	681	665	975	840	919	655	755.97	1041	612	902	813	678.06	663	556	680	482	Gh_A07G0156	Gh_A07G0156	Protein TIFY 3B [Source:UniProtKB/Swiss-Prot;Acc:Q9C5K8]	Environmental Information Processing	Signal transduction	ko04075//Plant hormone signal transduction	GO:0005622//intracellular;GO:0005634//nucleus;GO:0043229//intracellular organelle;GO:0044464//cell part;GO:0043231//intracellular membrane-bounded organelle;GO:0044424//intracellular part;GO:0005623//cell;GO:0043227//membrane-bounded organelle;GO:0043226//organelle	-	GO:2001141//regulation of RNA biosynthetic process;GO:0006355//regulation of transcription, DNA-templated;GO:0031323//regulation of cellular metabolic process;GO:0090304//nucleic acid metabolic process;GO:0044271//cellular nitrogen compound biosynthetic process;GO:0016070//RNA metabolic process;GO:0006139//nucleobase-containing compound metabolic process;GO:0043170//macromolecule metabolic proces…
Gh_A08G2199	7.41	11.41	4.26	7.79	19.67	36.21	41.96	26.33	28.09	0.92	1.06	3.79	2.98	10.97	7.47	16.72	6.15	9.99	96.42	152.95	49.79	95.03	307.07	452.21	585.06	291.87	333.81	12.34	11.27	47.54	45	122.71	76	210.54	78	117.93	Gh_A08G2199	Gh_A08G2199	Protein TIFY 10A [Source:UniProtKB/Swiss-Prot;Acc:Q9LMA8]	Environmental Information Processing	Signal transduction	ko04075//Plant hormone signal transduction	GO:0043229//intracellular organelle;GO:0043227//membrane-bounded organelle;GO:0005623//cell;GO:0043231//intracellular membrane-bounded organelle;GO:0043226//organelle;GO:0005622//intracellular;GO:0044464//cell part;GO:0005634//nucleus;GO:0044424//intracellular part	-	GO:0044699//single-organism process;GO:0032774//RNA biosynthetic process;GO:0090304//nucleic acid metabolic process;GO:0019222//regulation of metabolic process;GO:0050794//regulation of cellular process;GO:0048856//anatomical structure development;GO:0009617//response to bacterium;GO:0001101//response to acid chemical;GO:0044237//cellular metabolic process;GO:0043170//macromolecule metabolic proc…
Gh_A10G2244	10.4	13.98	8.7	9.95	18.12	35.32	57.65	47.68	53.98	4.73	4.21	5.8	4.45	6.01	6.97	14.16	8.09	10.92	145	200.76	109	130	303	472.39	861	566	687	68	48	78	72	72	76	191	110	138	Gh_A10G2244	Gh_A10G2244	Protein TIFY 11B [Source:UniProtKB/Swiss-Prot;Acc:Q9C9E3]	Environmental Information Processing	Signal transduction	ko04075//Plant hormone signal transduction	GO:0044424//intracellular part;GO:0005634//nucleus;GO:0043231//intracellular membrane-bounded organelle;GO:0043229//intracellular organelle;GO:0043227//membrane-bounded organelle;GO:0005622//intracellular;GO:0044464//cell part;GO:0043226//organelle;GO:0005623//cell	-	GO:0006807//nitrogen compound metabolic process;GO:0006950//response to stress;GO:0065007//biological regulation;GO:0031323//regulation of cellular metabolic process;GO:0050896//response to stimulus;GO:0009725//response to hormone;GO:0009059//macromolecule biosynthetic process;GO:1903506//regulation of nucleic acid-templated transcription;GO:2000112//regulation of cellular macromolecule biosynthe…
Gh_A12G2441	12.11	11.04	8.8	9.28	12.62	9.67	12.03	11.14	13.83	14.09	14.94	17	10.96	11.28	10.32	13.54	13.7	12.83	231	217	151	166	289	177	246	181	241	277	233	313	243	185	154	250	255	222	Gh_A12G2441	Gh_A12G2441	Protein TIFY 6B [Source:UniProtKB/Swiss-Prot;Acc:Q9LVI4]	Environmental Information Processing	Signal transduction	ko04075//Plant hormone signal transduction	GO:0043229//intracellular organelle;GO:0005622//intracellular;GO:0005623//cell;GO:0005634//nucleus;GO:0044464//cell part;GO:0043226//organelle;GO:0044424//intracellular part;GO:0043231//intracellular membrane-bounded organelle;GO:0043227//membrane-bounded organelle	GO:0005488//binding;GO:0042802//identical protein binding;GO:0005515//protein binding	GO:0006351//transcription, DNA-templated;GO:0031326//regulation of cellular biosynthetic process;GO:0008152//metabolic process;GO:1901576//organic substance biosynthetic process;GO:0006952//defense response;GO:0023052//signaling;GO:0044237//cellular metabolic process;GO:0009889//regulation of biosynthetic process;GO:0060255//regulation of macromolecule metabolic process;GO:0010033//response to or…
Gh_D01G0196	3.85	3.01	4.7	2	4.4	7.54	5.26	4.96	4.11	1.46	2.05	1.75	1.78	1.86	1.8	4.56	2.5	3	41	33	45	20	56.18	77	60	45	40	16	17.85	18	22	17	15	47	26	29	Gh_D01G0196	Gh_D01G0196	-	Environmental Information Processing	Signal transduction	ko04075//Plant hormone signal transduction	GO:0005623//cell;GO:0043227//membrane-bounded organelle;GO:0005634//nucleus;GO:0044424//intracellular part;GO:0043226//organelle;GO:0044464//cell part;GO:0043231//intracellular membrane-bounded organelle;GO:0005622//intracellular;GO:0043229//intracellular organelle	GO:0005488//binding;GO:0046983//protein dimerization activity;GO:0005515//protein binding;GO:0042802//identical protein binding;GO:0042803//protein homodimerization activity	GO:0034641//cellular nitrogen compound metabolic process;GO:0050776//regulation of immune response;GO:0090304//nucleic acid metabolic process;GO:1901360//organic cyclic compound metabolic process;GO:0010646//regulation of cell communication;GO:0010033//response to organic substance;GO:0060255//regulation of macromolecule metabolic process;GO:0051171//regulation of nitrogen compound metabolic proc…
Gh_D01G1406	9.75	10.19	10.28	9.1	9.83	11.2	11.8	8.24	10.13	9.02	10.75	15.66	7.98	9.72	6.44	8.47	8.4	6.97	182	196	172.53	159.2	220.11	200.71	236	131	172.64	173.56	164	282.13	173	156	94	153	153	118	Gh_D01G1406	Gh_D01G1406	Protein TIFY 6B [Source:UniProtKB/Swiss-Prot;Acc:Q9LVI4]	Environmental Information Processing	Signal transduction	ko04075//Plant hormone signal transduction	GO:0043229//intracellular organelle;GO:0005622//intracellular;GO:0005623//cell;GO:0005634//nucleus;GO:0044464//cell part;GO:0043226//organelle;GO:0044424//intracellular part;GO:0043231//intracellular membrane-bounded organelle;GO:0043227//membrane-bounded organelle	GO:0005488//binding;GO:0042802//identical protein binding;GO:0005515//protein binding	GO:0006351//transcription, DNA-templated;GO:0031326//regulation of cellular biosynthetic process;GO:0008152//metabolic process;GO:1901576//organic substance biosynthetic process;GO:0006952//defense response;GO:0023052//signaling;GO:0044237//cellular metabolic process;GO:0009889//regulation of biosynthetic process;GO:0060255//regulation of macromolecule metabolic process;GO:0010033//response to or…
Gh_D02G1776	1.99	2.9	1	2.83	5.04	12.68	8.37	12.17	11.51	0.77	0.73	3.72	1.53	1.16	1.15	2.58	3.37	2.86	20	30	9	26.61	60.61	122	90	104	105.37	8	6	36	17.81	10	9	25	33	26	Gh_D02G1776	Gh_D02G1776	-	Environmental Information Processing	Signal transduction	ko04075//Plant hormone signal transduction	GO:0005623//cell;GO:0043227//membrane-bounded organelle;GO:0005634//nucleus;GO:0044424//intracellular part;GO:0043226//organelle;GO:0044464//cell part;GO:0043231//intracellular membrane-bounded organelle;GO:0005622//intracellular;GO:0043229//intracellular organelle	GO:0005488//binding;GO:0046983//protein dimerization activity;GO:0005515//protein binding;GO:0042802//identical protein binding;GO:0042803//protein homodimerization activity	GO:0034641//cellular nitrogen compound metabolic process;GO:0050776//regulation of immune response;GO:0090304//nucleic acid metabolic process;GO:1901360//organic cyclic compound metabolic process;GO:0010646//regulation of cell communication;GO:0010033//response to organic substance;GO:0060255//regulation of macromolecule metabolic process;GO:0051171//regulation of nitrogen compound metabolic proc…
Gh_D05G0352	22.51	32.74	13.46	22.12	44.44	91.89	105.22	97.47	91.71	9.55	6.61	18.65	12.71	26.57	19.5	44.51	23.99	37.54	279	418	150	257	661	1093	1397.55	1029	1038	122	67	223	183	283	189	534	290	422	Gh_D05G0352	Gh_D05G0352	Protein TIFY 10B [Source:UniProtKB/Swiss-Prot;Acc:Q9S7M2]	Environmental Information Processing	Signal transduction	ko04075//Plant hormone signal transduction	GO:0043226//organelle;GO:0044464//cell part;GO:0043229//intracellular organelle;GO:0005622//intracellular;GO:0043227//membrane-bounded organelle;GO:0005623//cell;GO:0044424//intracellular part;GO:0043231//intracellular membrane-bounded organelle;GO:0005634//nucleus	-	GO:0097659//nucleic acid-templated transcription;GO:0009987//cellular process;GO:0009719//response to endogenous stimulus;GO:2000112//regulation of cellular macromolecule biosynthetic process;GO:0019219//regulation of nucleobase-containing compound metabolic process;GO:0010033//response to organic substance;GO:0044271//cellular nitrogen compound biosynthetic process;GO:0031326//regulation of cell…
Gh_D05G0379	187.08	172.12	136.46	149.4	192.95	190.83	169.69	183.92	181.59	204.59	170.54	190.49	160.24	199.62	205.71	140.45	167.41	134.21	2184	2069.89	1431.9	1635	2702.94	2138	2122.95	1828.96	1935.96	2461.84	1627	2145.9	2173	2003	1877.97	1587	1905.94	1421	Gh_D05G0379	Gh_D05G0379	Protein TIFY 3B [Source:UniProtKB/Swiss-Prot;Acc:Q9C5K8]	Environmental Information Processing	Signal transduction	ko04075//Plant hormone signal transduction	GO:0005622//intracellular;GO:0005634//nucleus;GO:0043229//intracellular organelle;GO:0044464//cell part;GO:0043231//intracellular membrane-bounded organelle;GO:0044424//intracellular part;GO:0005623//cell;GO:0043227//membrane-bounded organelle;GO:0043226//organelle	-	GO:2001141//regulation of RNA biosynthetic process;GO:0006355//regulation of transcription, DNA-templated;GO:0031323//regulation of cellular metabolic process;GO:0090304//nucleic acid metabolic process;GO:0044271//cellular nitrogen compound biosynthetic process;GO:0016070//RNA metabolic process;GO:0006139//nucleobase-containing compound metabolic process;GO:0043170//macromolecule metabolic proces…
Gh_D05G1332	6.51	8.48	4.1	10.23	9.99	14.19	10.55	8.45	9.94	1.75	4.82	6.04	3.83	1.4	1.31	13.19	7.91	7.65	76	102	43	112	140	159	132	84	106	21	46	68	52	14	12	149	90	81	Gh_D05G1332	Gh_D05G1332	Protein TIFY 11B [Source:UniProtKB/Swiss-Prot;Acc:Q9C9E3]	Environmental Information Processing	Signal transduction	ko04075//Plant hormone signal transduction	GO:0044424//intracellular part;GO:0005634//nucleus;GO:0043231//intracellular membrane-bounded organelle;GO:0043229//intracellular organelle;GO:0043227//membrane-bounded organelle;GO:0005622//intracellular;GO:0044464//cell part;GO:0043226//organelle;GO:0005623//cell	-	GO:0006807//nitrogen compound metabolic process;GO:0006950//response to stress;GO:0065007//biological regulation;GO:0031323//regulation of cellular metabolic process;GO:0050896//response to stimulus;GO:0009725//response to hormone;GO:0009059//macromolecule biosynthetic process;GO:1903506//regulation of nucleic acid-templated transcription;GO:2000112//regulation of cellular macromolecule biosynthe…
Gh_D05G2975	79.09	67.29	56.79	74.92	78.89	66.33	36.79	35.97	39.5	52.45	64.03	65.16	62.61	64.69	62.1	67.7	87.71	58.16	1488.64	1304.78	960.86	1322.03	1781.93	1198.29	742	576.75	679	1017.57	985	1183.57	1369	1046.61	914	1233.28	1610	992.91	Gh_D05G2975	Gh_D05G2975	Protein TIFY 6B [Source:UniProtKB/Swiss-Prot;Acc:Q9LVI4]	Environmental Information Processing	Signal transduction	ko04075//Plant hormone signal transduction	GO:0043229//intracellular organelle;GO:0005622//intracellular;GO:0005623//cell;GO:0005634//nucleus;GO:0044464//cell part;GO:0043226//organelle;GO:0044424//intracellular part;GO:0043231//intracellular membrane-bounded organelle;GO:0043227//membrane-bounded organelle	GO:0005488//binding;GO:0042802//identical protein binding;GO:0005515//protein binding	GO:0006351//transcription, DNA-templated;GO:0031326//regulation of cellular biosynthetic process;GO:0008152//metabolic process;GO:1901576//organic substance biosynthetic process;GO:0006952//defense response;GO:0023052//signaling;GO:0044237//cellular metabolic process;GO:0009889//regulation of biosynthetic process;GO:0060255//regulation of macromolecule metabolic process;GO:0010033//response to or…
Gh_D06G0810	39.84	57.11	23.47	33.99	84.84	130.52	170.6	134.03	132.22	17.36	12.35	22.06	17.91	40.16	26.07	49.97	39.08	41.45	540.86	798.82	286.39	432.56	1382.18	1700.67	2482.12	1550.08	1639.43	243	137	289.05	282.45	468.67	276.8	656.62	517.49	510.39	Gh_D06G0810	Gh_D06G0810	Protein TIFY 10A [Source:UniProtKB/Swiss-Prot;Acc:Q9LMA8]	Environmental Information Processing	Signal transduction	ko04075//Plant hormone signal transduction	GO:0043229//intracellular organelle;GO:0043227//membrane-bounded organelle;GO:0005623//cell;GO:0043231//intracellular membrane-bounded organelle;GO:0043226//organelle;GO:0005622//intracellular;GO:0044464//cell part;GO:0005634//nucleus;GO:0044424//intracellular part	-	GO:0044699//single-organism process;GO:0032774//RNA biosynthetic process;GO:0090304//nucleic acid metabolic process;GO:0019222//regulation of metabolic process;GO:0050794//regulation of cellular process;GO:0048856//anatomical structure development;GO:0009617//response to bacterium;GO:0001101//response to acid chemical;GO:0044237//cellular metabolic process;GO:0043170//macromolecule metabolic proc…
Gh_D07G0152	76.93	59.76	65.84	55.89	71.61	62.38	71.23	66.19	75.22	62.69	63.59	66.61	54.02	59.76	64.28	32.9	46.41	43.72	906	725	697	617	1012	705	899	664	809.03	761	612	757	739	604.94	592	375	533	467	Gh_D07G0152	Gh_D07G0152	Protein TIFY 3B [Source:UniProtKB/Swiss-Prot;Acc:Q9C5K8]	Environmental Information Processing	Signal transduction	ko04075//Plant hormone signal transduction	GO:0005622//intracellular;GO:0005634//nucleus;GO:0043229//intracellular organelle;GO:0044464//cell part;GO:0043231//intracellular membrane-bounded organelle;GO:0044424//intracellular part;GO:0005623//cell;GO:0043227//membrane-bounded organelle;GO:0043226//organelle	-	GO:2001141//regulation of RNA biosynthetic process;GO:0006355//regulation of transcription, DNA-templated;GO:0031323//regulation of cellular metabolic process;GO:0090304//nucleic acid metabolic process;GO:0044271//cellular nitrogen compound biosynthetic process;GO:0016070//RNA metabolic process;GO:0006139//nucleobase-containing compound metabolic process;GO:0043170//macromolecule metabolic proces…
Gh_D08G2564	18.02	28.49	11.22	14.44	42.53	84.46	78.73	69.31	72.45	7.05	2.73	8.23	5.75	24.57	10.88	29.46	14.95	21.45	207.58	338.05	116.21	155.97	587.93	933.79	971.94	680.13	762.19	83.66	25.73	91.46	77	243.29	98	328.46	168	224.07	Gh_D08G2564	Gh_D08G2564	Protein TIFY 10A [Source:UniProtKB/Swiss-Prot;Acc:Q9LMA8]	Environmental Information Processing	Signal transduction	ko04075//Plant hormone signal transduction	GO:0043229//intracellular organelle;GO:0043227//membrane-bounded organelle;GO:0005623//cell;GO:0043231//intracellular membrane-bounded organelle;GO:0043226//organelle;GO:0005622//intracellular;GO:0044464//cell part;GO:0005634//nucleus;GO:0044424//intracellular part	-	GO:0044699//single-organism process;GO:0032774//RNA biosynthetic process;GO:0090304//nucleic acid metabolic process;GO:0019222//regulation of metabolic process;GO:0050794//regulation of cellular process;GO:0048856//anatomical structure development;GO:0009617//response to bacterium;GO:0001101//response to acid chemical;GO:0044237//cellular metabolic process;GO:0043170//macromolecule metabolic proc…
Gh_D10G0531	15.57	23	9.58	22.27	28.58	55.22	77.27	71.09	77.16	6.13	4.13	7.73	7.78	13.44	10.28	27.06	12.8	20.09	217	330.24	120	291	478	738.61	1154	844	982	88	47	104	126	161	112	365	174	254	Gh_D10G0531	Gh_D10G0531	Protein TIFY 11B [Source:UniProtKB/Swiss-Prot;Acc:Q9C9E3]	Environmental Information Processing	Signal transduction	ko04075//Plant hormone signal transduction	GO:0044424//intracellular part;GO:0005634//nucleus;GO:0043231//intracellular membrane-bounded organelle;GO:0043229//intracellular organelle;GO:0043227//membrane-bounded organelle;GO:0005622//intracellular;GO:0044464//cell part;GO:0043226//organelle;GO:0005623//cell	-	GO:0006807//nitrogen compound metabolic process;GO:0006950//response to stress;GO:0065007//biological regulation;GO:0031323//regulation of cellular metabolic process;GO:0050896//response to stimulus;GO:0009725//response to hormone;GO:0009059//macromolecule biosynthetic process;GO:1903506//regulation of nucleic acid-templated transcription;GO:2000112//regulation of cellular macromolecule biosynthe…
Gh_D12G2567	24.83	24.71	24.54	24.42	28.75	28.81	48.53	46.15	44.87	35.5	31.79	32.99	29.16	32.35	24.8	27.38	36.93	37.52	475	487	422	438	660	529	995	752	784	700	497	609	648	532	371	507	689	651	Gh_D12G2567	Gh_D12G2567	Protein TIFY 6B [Source:UniProtKB/Swiss-Prot;Acc:Q9LVI4]	Environmental Information Processing	Signal transduction	ko04075//Plant hormone signal transduction	GO:0043229//intracellular organelle;GO:0005622//intracellular;GO:0005623//cell;GO:0005634//nucleus;GO:0044464//cell part;GO:0043226//organelle;GO:0044424//intracellular part;GO:0043231//intracellular membrane-bounded organelle;GO:0043227//membrane-bounded organelle	GO:0005488//binding;GO:0042802//identical protein binding;GO:0005515//protein binding	GO:0006351//transcription, DNA-templated;GO:0031326//regulation of cellular biosynthetic process;GO:0008152//metabolic process;GO:1901576//organic substance biosynthetic process;GO:0006952//defense response;GO:0023052//signaling;GO:0044237//cellular metabolic process;GO:0009889//regulation of biosynthetic process;GO:0060255//regulation of macromolecule metabolic process;GO:0010033//response to or…
Gh_A01G1374	13.47	10.49	12.82	9.59	9.13	10.31	8.53	8.86	9.7	7.68	9.27	8.2	12.12	7.87	8.41	8.49	9.01	8.29	336.59	270.14	288.01	224.63	273.77	247.37	228.58	188.66	221.43	197.87	189.34	197.68	351.84	168.98	164.39	205.43	219.65	187.94	Gh_A01G1374	Gh_A01G1374	Auxin transporter-like protein 2 [Source:UniProtKB/Swiss-Prot;Acc:Q9S836]	Environmental Information Processing	Signal transduction	ko04075//Plant hormone signal transduction	GO:0016020//membrane;GO:0031224//intrinsic component of membrane;GO:0005886//plasma membrane;GO:0071944//cell periphery;GO:0016021//integral component of membrane;GO:0005623//cell;GO:0044425//membrane part;GO:0044464//cell part	GO:0015291//secondary active transmembrane transporter activity;GO:0008509//anion transmembrane transporter activity;GO:0022857//transmembrane transporter activity;GO:0015293//symporter activity;GO:0022891//substrate-specific transmembrane transporter activity;GO:0008514//organic anion transmembrane transporter activity;GO:0005342//organic acid transmembrane transporter activity;GO:0022892//subst…	GO:0048608//reproductive structure development;GO:0051234//establishment of localization;GO:0044767//single-organism developmental process;GO:0006810//transport;GO:0044700//single organism signaling;GO:0048316//seed development;GO:0006865//amino acid transport;GO:0048367//shoot system development;GO:0065007//biological regulation;GO:0051707//response to other organism;GO:0006820//anion transport;…
Gh_A01G1955	76.2	68.46	65.03	88.5	78.63	88.28	117.01	123.17	117.74	61.64	58.78	59.1	78.99	79.2	84.5	64.26	94.89	108.26	1892.83	1751.92	1452	2060.86	2343.67	2104.44	3114.78	2606.17	2670.9	1578.16	1193.19	1416.71	2279.33	1690.79	1641.41	1545.05	2298.53	2438.87	Gh_A01G1955	Gh_A01G1955	Auxin transporter protein 1 [Source:UniProtKB/Swiss-Prot;Acc:Q96247]	Environmental Information Processing	Signal transduction	ko04075//Plant hormone signal transduction	GO:0071944//cell periphery;GO:0043227//membrane-bounded organelle;GO:0016021//integral component of membrane;GO:0005794//Golgi apparatus;GO:0005886//plasma membrane;GO:0016020//membrane;GO:0012505//endomembrane system;GO:0044425//membrane part;GO:0044464//cell part;GO:0043229//intracellular organelle;GO:0044444//cytoplasmic part;GO:0005623//cell;GO:0043226//organelle;GO:0044424//intracellular par…	GO:0005215//transporter activity;GO:0015075//ion transmembrane transporter activity;GO:0015293//symporter activity;GO:0080161//auxin transmembrane transporter activity;GO:0005342//organic acid transmembrane transporter activity;GO:0022857//transmembrane transporter activity;GO:0022891//substrate-specific transmembrane transporter activity;GO:0022804//active transmembrane transporter activity;GO:0…	GO:0044767//single-organism developmental process;GO:0009719//response to endogenous stimulus;GO:0048646//anatomical structure formation involved in morphogenesis;GO:0048527//lateral root development;GO:0009734//auxin-activated signaling pathway;GO:0055085//transmembrane transport;GO:0071495//cellular response to endogenous stimulus;GO:0009888//tissue development;GO:0090627//plant epidermal cell …
Gh_A03G1804	4.88	3.88	6.04	6.98	3.33	2.57	1.86	1.52	2.37	5.32	5.83	5.76	5.26	4.99	6.72	5.71	5.23	5.68	124.5	101.9	138.53	166.88	102	63	50.94	33	55.16	139.91	121.52	141.88	156	109.51	134.07	140.92	130	131.4	Gh_A03G1804	Gh_A03G1804	Auxin transporter-like protein 2 [Source:UniProtKB/Swiss-Prot;Acc:Q9S836]	Environmental Information Processing	Signal transduction	ko04075//Plant hormone signal transduction	GO:0016020//membrane;GO:0031224//intrinsic component of membrane;GO:0005886//plasma membrane;GO:0071944//cell periphery;GO:0016021//integral component of membrane;GO:0005623//cell;GO:0044425//membrane part;GO:0044464//cell part	GO:0015291//secondary active transmembrane transporter activity;GO:0008509//anion transmembrane transporter activity;GO:0022857//transmembrane transporter activity;GO:0015293//symporter activity;GO:0022891//substrate-specific transmembrane transporter activity;GO:0008514//organic anion transmembrane transporter activity;GO:0005342//organic acid transmembrane transporter activity;GO:0022892//subst…	GO:0048608//reproductive structure development;GO:0051234//establishment of localization;GO:0044767//single-organism developmental process;GO:0006810//transport;GO:0044700//single organism signaling;GO:0048316//seed development;GO:0006865//amino acid transport;GO:0048367//shoot system development;GO:0065007//biological regulation;GO:0051707//response to other organism;GO:0006820//anion transport;…
Gh_A04G0767	64.7	49.55	46.91	65.82	70.73	77.08	93.28	101.22	103.62	65.66	66.73	59.88	95.07	92.95	112.36	74.84	83.03	95.28	1610.32	1270.67	1049.44	1535.87	2112.6	1841.21	2488.26	2146.25	2355.52	1684.6	1357.4	1438.26	2748.83	1988.49	2187.07	1802.95	2015.44	2150.99	Gh_A04G0767	Gh_A04G0767	Auxin transporter protein 1 [Source:UniProtKB/Swiss-Prot;Acc:Q96247]	Environmental Information Processing	Signal transduction	ko04075//Plant hormone signal transduction	GO:0071944//cell periphery;GO:0043227//membrane-bounded organelle;GO:0016021//integral component of membrane;GO:0005794//Golgi apparatus;GO:0005886//plasma membrane;GO:0016020//membrane;GO:0012505//endomembrane system;GO:0044425//membrane part;GO:0044464//cell part;GO:0043229//intracellular organelle;GO:0044444//cytoplasmic part;GO:0005623//cell;GO:0043226//organelle;GO:0044424//intracellular par…	GO:0005215//transporter activity;GO:0015075//ion transmembrane transporter activity;GO:0015293//symporter activity;GO:0080161//auxin transmembrane transporter activity;GO:0005342//organic acid transmembrane transporter activity;GO:0022857//transmembrane transporter activity;GO:0022891//substrate-specific transmembrane transporter activity;GO:0022804//active transmembrane transporter activity;GO:0…	GO:0044767//single-organism developmental process;GO:0009719//response to endogenous stimulus;GO:0048646//anatomical structure formation involved in morphogenesis;GO:0048527//lateral root development;GO:0009734//auxin-activated signaling pathway;GO:0055085//transmembrane transport;GO:0071495//cellular response to endogenous stimulus;GO:0009888//tissue development;GO:0090627//plant epidermal cell …
Gh_A05G3646	0.33	0.21	0.5	0.39	0.37	0.08	0.15	0.24	0.31	0.39	0.72	0.3	0.14	0.09	0.36	0.13	0.25	0.1	8	5.28	11	9	11	2	4	5	7	10	14.56	7	4	2	7	3	6	2.15	Gh_A05G3646	Gh_A05G3646	Auxin transporter protein 1 [Source:UniProtKB/Swiss-Prot;Acc:Q96247]	Environmental Information Processing	Signal transduction	ko04075//Plant hormone signal transduction	GO:0071944//cell periphery;GO:0043227//membrane-bounded organelle;GO:0016021//integral component of membrane;GO:0005794//Golgi apparatus;GO:0005886//plasma membrane;GO:0016020//membrane;GO:0012505//endomembrane system;GO:0044425//membrane part;GO:0044464//cell part;GO:0043229//intracellular organelle;GO:0044444//cytoplasmic part;GO:0005623//cell;GO:0043226//organelle;GO:0044424//intracellular par…	GO:0005215//transporter activity;GO:0015075//ion transmembrane transporter activity;GO:0015293//symporter activity;GO:0080161//auxin transmembrane transporter activity;GO:0005342//organic acid transmembrane transporter activity;GO:0022857//transmembrane transporter activity;GO:0022891//substrate-specific transmembrane transporter activity;GO:0022804//active transmembrane transporter activity;GO:0…	GO:0044767//single-organism developmental process;GO:0009719//response to endogenous stimulus;GO:0048646//anatomical structure formation involved in morphogenesis;GO:0048527//lateral root development;GO:0009734//auxin-activated signaling pathway;GO:0055085//transmembrane transport;GO:0071495//cellular response to endogenous stimulus;GO:0009888//tissue development;GO:0090627//plant epidermal cell …
Gh_A06G0351	2.78	6.84	8.74	8.63	3.83	4.73	2.78	3.07	4.73	3.73	5.41	4.88	4.58	1.57	1.09	11.76	4.72	6.4	68.25	173.17	193.01	198.98	113.03	111.48	73.12	64.25	106.14	94.62	108.74	115.78	130.68	33.16	20.9	279.91	113.12	142.58	Gh_A06G0351	Gh_A06G0351	Auxin transporter-like protein 3 [Source:UniProtKB/Swiss-Prot;Acc:Q9CA25]	Environmental Information Processing	Signal transduction	ko04075//Plant hormone signal transduction	GO:0016020//membrane;GO:0005623//cell;GO:0044464//cell part;GO:0005886//plasma membrane;GO:0044425//membrane part;GO:0016021//integral component of membrane;GO:0071944//cell periphery;GO:0031224//intrinsic component of membrane	GO:0005215//transporter activity;GO:0022891//substrate-specific transmembrane transporter activity;GO:0022857//transmembrane transporter activity;GO:0046943//carboxylic acid transmembrane transporter activity;GO:0005342//organic acid transmembrane transporter activity;GO:0015291//secondary active transmembrane transporter activity;GO:0008509//anion transmembrane transporter activity;GO:0010328//a…	GO:0048528//post-embryonic root development;GO:0060919//auxin influx;GO:0048645//organ formation;GO:0009719//response to endogenous stimulus;GO:0042221//response to chemical;GO:0009926//auxin polar transport;GO:0006820//anion transport;GO:0044767//single-organism developmental process;GO:0006865//amino acid transport;GO:0009653//anatomical structure morphogenesis;GO:0048513//organ development;GO:…
Gh_A09G1530	24.38	19.14	19.17	20.51	23.45	23.51	19.51	28.12	25.4	31.71	25.05	27.33	30.41	37.77	38.28	21.08	25.43	26.1	601.72	486.77	425.35	474.58	694.71	557.05	516.21	591.24	572.61	806.93	505.37	650.91	872.05	801.45	738.96	503.74	612.3	584.32	Gh_A09G1530	Gh_A09G1530	Auxin transporter protein 1 [Source:UniProtKB/Swiss-Prot;Acc:Q96247]	Environmental Information Processing	Signal transduction	ko04075//Plant hormone signal transduction	GO:0071944//cell periphery;GO:0043227//membrane-bounded organelle;GO:0016021//integral component of membrane;GO:0005794//Golgi apparatus;GO:0005886//plasma membrane;GO:0016020//membrane;GO:0012505//endomembrane system;GO:0044425//membrane part;GO:0044464//cell part;GO:0043229//intracellular organelle;GO:0044444//cytoplasmic part;GO:0005623//cell;GO:0043226//organelle;GO:0044424//intracellular par…	GO:0005215//transporter activity;GO:0015075//ion transmembrane transporter activity;GO:0015293//symporter activity;GO:0080161//auxin transmembrane transporter activity;GO:0005342//organic acid transmembrane transporter activity;GO:0022857//transmembrane transporter activity;GO:0022891//substrate-specific transmembrane transporter activity;GO:0022804//active transmembrane transporter activity;GO:0…	GO:0044767//single-organism developmental process;GO:0009719//response to endogenous stimulus;GO:0048646//anatomical structure formation involved in morphogenesis;GO:0048527//lateral root development;GO:0009734//auxin-activated signaling pathway;GO:0055085//transmembrane transport;GO:0071495//cellular response to endogenous stimulus;GO:0009888//tissue development;GO:0090627//plant epidermal cell …
Gh_A10G2096	9.69	11.22	10.23	13.39	11.27	13.56	15.64	17.02	15.38	7.46	8.12	8.09	9.89	8.01	7.23	8.66	11.09	10.05	235.62	281.15	223.61	305.43	328.98	316.67	407.75	352.71	341.71	186.99	161.33	189.8	279.53	167.37	137.62	203.84	263.19	221.77	Gh_A10G2096	Gh_A10G2096	Auxin transporter protein 1 [Source:UniProtKB/Swiss-Prot;Acc:Q96247]	Environmental Information Processing	Signal transduction	ko04075//Plant hormone signal transduction	GO:0071944//cell periphery;GO:0043227//membrane-bounded organelle;GO:0016021//integral component of membrane;GO:0005794//Golgi apparatus;GO:0005886//plasma membrane;GO:0016020//membrane;GO:0012505//endomembrane system;GO:0044425//membrane part;GO:0044464//cell part;GO:0043229//intracellular organelle;GO:0044444//cytoplasmic part;GO:0005623//cell;GO:0043226//organelle;GO:0044424//intracellular par…	GO:0005215//transporter activity;GO:0015075//ion transmembrane transporter activity;GO:0015293//symporter activity;GO:0080161//auxin transmembrane transporter activity;GO:0005342//organic acid transmembrane transporter activity;GO:0022857//transmembrane transporter activity;GO:0022891//substrate-specific transmembrane transporter activity;GO:0022804//active transmembrane transporter activity;GO:0…	GO:0044767//single-organism developmental process;GO:0009719//response to endogenous stimulus;GO:0048646//anatomical structure formation involved in morphogenesis;GO:0048527//lateral root development;GO:0009734//auxin-activated signaling pathway;GO:0055085//transmembrane transport;GO:0071495//cellular response to endogenous stimulus;GO:0009888//tissue development;GO:0090627//plant epidermal cell …
Gh_A13G0149	4.89	4.5	7.5	3.77	3.32	1.5	1.46	1.38	0.97	10.39	10.59	9.06	5.95	7.06	9.23	4.4	5.84	3.67	119	112.7	164	85.88	96.81	35	38	28.64	21.49	260.57	210.53	212.67	168.03	147.69	175.51	103.49	138.62	80.86	Gh_A13G0149	Gh_A13G0149	Auxin transporter protein 1 [Source:UniProtKB/Swiss-Prot;Acc:Q96247]	Environmental Information Processing	Signal transduction	ko04075//Plant hormone signal transduction	GO:0071944//cell periphery;GO:0043227//membrane-bounded organelle;GO:0016021//integral component of membrane;GO:0005794//Golgi apparatus;GO:0005886//plasma membrane;GO:0016020//membrane;GO:0012505//endomembrane system;GO:0044425//membrane part;GO:0044464//cell part;GO:0043229//intracellular organelle;GO:0044444//cytoplasmic part;GO:0005623//cell;GO:0043226//organelle;GO:0044424//intracellular par…	GO:0005215//transporter activity;GO:0015075//ion transmembrane transporter activity;GO:0015293//symporter activity;GO:0080161//auxin transmembrane transporter activity;GO:0005342//organic acid transmembrane transporter activity;GO:0022857//transmembrane transporter activity;GO:0022891//substrate-specific transmembrane transporter activity;GO:0022804//active transmembrane transporter activity;GO:0…	GO:0044767//single-organism developmental process;GO:0009719//response to endogenous stimulus;GO:0048646//anatomical structure formation involved in morphogenesis;GO:0048527//lateral root development;GO:0009734//auxin-activated signaling pathway;GO:0055085//transmembrane transport;GO:0071495//cellular response to endogenous stimulus;GO:0009888//tissue development;GO:0090627//plant epidermal cell …
Gh_D01G1617	18.38	17.74	19.05	12.82	13.91	11.57	6.33	7.58	10.45	18.68	16.34	15.4	13.99	14.85	17.32	12.05	12.36	14.03	459.41	456.86	427.99	300.37	417.23	277.63	169.42	161.34	238.57	481.13	333.66	371.32	406.16	319.02	338.61	291.57	301.35	318.06	Gh_D01G1617	Gh_D01G1617	Auxin transporter-like protein 2 [Source:UniProtKB/Swiss-Prot;Acc:Q9S836]	Environmental Information Processing	Signal transduction	ko04075//Plant hormone signal transduction	GO:0016020//membrane;GO:0031224//intrinsic component of membrane;GO:0005886//plasma membrane;GO:0071944//cell periphery;GO:0016021//integral component of membrane;GO:0005623//cell;GO:0044425//membrane part;GO:0044464//cell part	GO:0015291//secondary active transmembrane transporter activity;GO:0008509//anion transmembrane transporter activity;GO:0022857//transmembrane transporter activity;GO:0015293//symporter activity;GO:0022891//substrate-specific transmembrane transporter activity;GO:0008514//organic anion transmembrane transporter activity;GO:0005342//organic acid transmembrane transporter activity;GO:0022892//subst…	GO:0048608//reproductive structure development;GO:0051234//establishment of localization;GO:0044767//single-organism developmental process;GO:0006810//transport;GO:0044700//single organism signaling;GO:0048316//seed development;GO:0006865//amino acid transport;GO:0048367//shoot system development;GO:0065007//biological regulation;GO:0051707//response to other organism;GO:0006820//anion transport;…
Gh_D01G2215	99.04	88.88	86.89	105.17	109.83	101.62	121.21	116.16	128.95	113.96	102.34	113.46	128.61	133.37	161.29	104.35	135.68	149.95	2465.17	2279.08	1944	2454.14	3280.33	2427.56	3233.22	2462.83	2931.1	2923.84	2081.81	2725.29	3718.67	2853.21	3139.59	2513.95	3293.47	3385.13	Gh_D01G2215	Gh_D01G2215	Auxin transporter protein 1 [Source:UniProtKB/Swiss-Prot;Acc:Q96247]	Environmental Information Processing	Signal transduction	ko04075//Plant hormone signal transduction	GO:0071944//cell periphery;GO:0043227//membrane-bounded organelle;GO:0016021//integral component of membrane;GO:0005794//Golgi apparatus;GO:0005886//plasma membrane;GO:0016020//membrane;GO:0012505//endomembrane system;GO:0044425//membrane part;GO:0044464//cell part;GO:0043229//intracellular organelle;GO:0044444//cytoplasmic part;GO:0005623//cell;GO:0043226//organelle;GO:0044424//intracellular par…	GO:0005215//transporter activity;GO:0015075//ion transmembrane transporter activity;GO:0015293//symporter activity;GO:0080161//auxin transmembrane transporter activity;GO:0005342//organic acid transmembrane transporter activity;GO:0022857//transmembrane transporter activity;GO:0022891//substrate-specific transmembrane transporter activity;GO:0022804//active transmembrane transporter activity;GO:0…	GO:0044767//single-organism developmental process;GO:0009719//response to endogenous stimulus;GO:0048646//anatomical structure formation involved in morphogenesis;GO:0048527//lateral root development;GO:0009734//auxin-activated signaling pathway;GO:0055085//transmembrane transport;GO:0071495//cellular response to endogenous stimulus;GO:0009888//tissue development;GO:0090627//plant epidermal cell …
Gh_D02G2237	4.88	4.72	5.95	6.45	5	4.21	2.09	2.44	3.77	5.82	5.35	6.51	4.93	4.77	5.86	6.77	6.39	4.74	124.5	124.1	136.47	154.12	153	103	57.06	53	87.84	153.09	111.48	160.12	146	104.49	116.93	167.08	159	109.6	Gh_D02G2237	Gh_D02G2237	Auxin transporter-like protein 2 [Source:UniProtKB/Swiss-Prot;Acc:Q9S836]	Environmental Information Processing	Signal transduction	ko04075//Plant hormone signal transduction	GO:0016020//membrane;GO:0031224//intrinsic component of membrane;GO:0005886//plasma membrane;GO:0071944//cell periphery;GO:0016021//integral component of membrane;GO:0005623//cell;GO:0044425//membrane part;GO:0044464//cell part	GO:0015291//secondary active transmembrane transporter activity;GO:0008509//anion transmembrane transporter activity;GO:0022857//transmembrane transporter activity;GO:0015293//symporter activity;GO:0022891//substrate-specific transmembrane transporter activity;GO:0008514//organic anion transmembrane transporter activity;GO:0005342//organic acid transmembrane transporter activity;GO:0022892//subst…	GO:0048608//reproductive structure development;GO:0051234//establishment of localization;GO:0044767//single-organism developmental process;GO:0006810//transport;GO:0044700//single organism signaling;GO:0048316//seed development;GO:0006865//amino acid transport;GO:0048367//shoot system development;GO:0065007//biological regulation;GO:0051707//response to other organism;GO:0006820//anion transport;…
Gh_D04G0646	0.41	0.54	0.77	0.61	0.75	0.34	0.57	1.29	0.67	0.43	0.57	0.46	0.49	0.19	0.05	0.42	0.5	0.53	10	13.72	17	14	22	8	15	27	15	11	11.44	11	14	4	1	10	12	11.85	Gh_D04G0646	Gh_D04G0646	Auxin transporter protein 1 [Source:UniProtKB/Swiss-Prot;Acc:Q96247]	Environmental Information Processing	Signal transduction	ko04075//Plant hormone signal transduction	GO:0071944//cell periphery;GO:0043227//membrane-bounded organelle;GO:0016021//integral component of membrane;GO:0005794//Golgi apparatus;GO:0005886//plasma membrane;GO:0016020//membrane;GO:0012505//endomembrane system;GO:0044425//membrane part;GO:0044464//cell part;GO:0043229//intracellular organelle;GO:0044444//cytoplasmic part;GO:0005623//cell;GO:0043226//organelle;GO:0044424//intracellular par…	GO:0005215//transporter activity;GO:0015075//ion transmembrane transporter activity;GO:0015293//symporter activity;GO:0080161//auxin transmembrane transporter activity;GO:0005342//organic acid transmembrane transporter activity;GO:0022857//transmembrane transporter activity;GO:0022891//substrate-specific transmembrane transporter activity;GO:0022804//active transmembrane transporter activity;GO:0…	GO:0044767//single-organism developmental process;GO:0009719//response to endogenous stimulus;GO:0048646//anatomical structure formation involved in morphogenesis;GO:0048527//lateral root development;GO:0009734//auxin-activated signaling pathway;GO:0055085//transmembrane transport;GO:0071495//cellular response to endogenous stimulus;GO:0009888//tissue development;GO:0090627//plant epidermal cell …
Gh_D04G1252	39	33.05	29.29	33.02	35.6	48.2	43.73	42.68	43.57	39.11	39.52	35.06	50.88	49.33	67.62	37.7	46.73	48.85	972.68	849.33	656.56	772.13	1065.4	1153.79	1168.74	906.75	992.48	1005.4	805.6	843.74	1474.17	1057.51	1318.93	910.05	1136.56	1105.01	Gh_D04G1252	Gh_D04G1252	Auxin transporter protein 1 [Source:UniProtKB/Swiss-Prot;Acc:Q96247]	Environmental Information Processing	Signal transduction	ko04075//Plant hormone signal transduction	GO:0071944//cell periphery;GO:0043227//membrane-bounded organelle;GO:0016021//integral component of membrane;GO:0005794//Golgi apparatus;GO:0005886//plasma membrane;GO:0016020//membrane;GO:0012505//endomembrane system;GO:0044425//membrane part;GO:0044464//cell part;GO:0043229//intracellular organelle;GO:0044444//cytoplasmic part;GO:0005623//cell;GO:0043226//organelle;GO:0044424//intracellular par…	GO:0005215//transporter activity;GO:0015075//ion transmembrane transporter activity;GO:0015293//symporter activity;GO:0080161//auxin transmembrane transporter activity;GO:0005342//organic acid transmembrane transporter activity;GO:0022857//transmembrane transporter activity;GO:0022891//substrate-specific transmembrane transporter activity;GO:0022804//active transmembrane transporter activity;GO:0…	GO:0044767//single-organism developmental process;GO:0009719//response to endogenous stimulus;GO:0048646//anatomical structure formation involved in morphogenesis;GO:0048527//lateral root development;GO:0009734//auxin-activated signaling pathway;GO:0055085//transmembrane transport;GO:0071495//cellular response to endogenous stimulus;GO:0009888//tissue development;GO:0090627//plant epidermal cell …
Gh_D06G0382	4.06	5.64	8.24	12.63	6.37	5.02	3.72	4	3.96	5.03	8.62	4.98	8.91	5.06	4.11	17.19	10.09	9.21	99.75	142.83	181.99	291.02	187.97	118.52	97.88	83.75	88.86	127.38	173.26	118.22	254.32	106.84	79.1	409.09	241.88	205.42	Gh_D06G0382	Gh_D06G0382	Auxin transporter-like protein 3 [Source:UniProtKB/Swiss-Prot;Acc:Q9CA25]	Environmental Information Processing	Signal transduction	ko04075//Plant hormone signal transduction	GO:0016020//membrane;GO:0005623//cell;GO:0044464//cell part;GO:0005886//plasma membrane;GO:0044425//membrane part;GO:0016021//integral component of membrane;GO:0071944//cell periphery;GO:0031224//intrinsic component of membrane	GO:0005215//transporter activity;GO:0022891//substrate-specific transmembrane transporter activity;GO:0022857//transmembrane transporter activity;GO:0046943//carboxylic acid transmembrane transporter activity;GO:0005342//organic acid transmembrane transporter activity;GO:0015291//secondary active transmembrane transporter activity;GO:0008509//anion transmembrane transporter activity;GO:0010328//a…	GO:0048528//post-embryonic root development;GO:0060919//auxin influx;GO:0048645//organ formation;GO:0009719//response to endogenous stimulus;GO:0042221//response to chemical;GO:0009926//auxin polar transport;GO:0006820//anion transport;GO:0044767//single-organism developmental process;GO:0006865//amino acid transport;GO:0009653//anatomical structure morphogenesis;GO:0048513//organ development;GO:…
Gh_D09G1548	21.4	15.46	16.12	14.67	16.55	16.5	15.07	22.2	19.89	23.35	19.61	20.15	17.89	23.07	26.99	12.73	18.97	17.72	528.28	393.23	357.65	339.42	490.29	390.95	398.79	466.76	448.39	594.07	395.63	480.09	512.95	489.55	521.04	304.26	456.7	396.68	Gh_D09G1548	Gh_D09G1548	Auxin transporter protein 1 [Source:UniProtKB/Swiss-Prot;Acc:Q96247]	Environmental Information Processing	Signal transduction	ko04075//Plant hormone signal transduction	GO:0071944//cell periphery;GO:0043227//membrane-bounded organelle;GO:0016021//integral component of membrane;GO:0005794//Golgi apparatus;GO:0005886//plasma membrane;GO:0016020//membrane;GO:0012505//endomembrane system;GO:0044425//membrane part;GO:0044464//cell part;GO:0043229//intracellular organelle;GO:0044444//cytoplasmic part;GO:0005623//cell;GO:0043226//organelle;GO:0044424//intracellular par…	GO:0005215//transporter activity;GO:0015075//ion transmembrane transporter activity;GO:0015293//symporter activity;GO:0080161//auxin transmembrane transporter activity;GO:0005342//organic acid transmembrane transporter activity;GO:0022857//transmembrane transporter activity;GO:0022891//substrate-specific transmembrane transporter activity;GO:0022804//active transmembrane transporter activity;GO:0…	GO:0044767//single-organism developmental process;GO:0009719//response to endogenous stimulus;GO:0048646//anatomical structure formation involved in morphogenesis;GO:0048527//lateral root development;GO:0009734//auxin-activated signaling pathway;GO:0055085//transmembrane transport;GO:0071495//cellular response to endogenous stimulus;GO:0009888//tissue development;GO:0090627//plant epidermal cell …
Gh_D10G2366	7.54	7.18	5.55	7.7	6.3	8.88	7.53	8.46	9.96	4.99	5.01	7.08	5.11	5.53	3.8	5.66	6.53	6.81	183.38	179.85	121.39	175.57	184.02	207.33	196.25	175.29	221.29	125.01	99.67	166.2	144.47	115.63	72.38	133.16	154.81	150.23	Gh_D10G2366	Gh_D10G2366	Auxin transporter protein 1 [Source:UniProtKB/Swiss-Prot;Acc:Q96247]	Environmental Information Processing	Signal transduction	ko04075//Plant hormone signal transduction	GO:0071944//cell periphery;GO:0043227//membrane-bounded organelle;GO:0016021//integral component of membrane;GO:0005794//Golgi apparatus;GO:0005886//plasma membrane;GO:0016020//membrane;GO:0012505//endomembrane system;GO:0044425//membrane part;GO:0044464//cell part;GO:0043229//intracellular organelle;GO:0044444//cytoplasmic part;GO:0005623//cell;GO:0043226//organelle;GO:0044424//intracellular par…	GO:0005215//transporter activity;GO:0015075//ion transmembrane transporter activity;GO:0015293//symporter activity;GO:0080161//auxin transmembrane transporter activity;GO:0005342//organic acid transmembrane transporter activity;GO:0022857//transmembrane transporter activity;GO:0022891//substrate-specific transmembrane transporter activity;GO:0022804//active transmembrane transporter activity;GO:0…	GO:0044767//single-organism developmental process;GO:0009719//response to endogenous stimulus;GO:0048646//anatomical structure formation involved in morphogenesis;GO:0048527//lateral root development;GO:0009734//auxin-activated signaling pathway;GO:0055085//transmembrane transport;GO:0071495//cellular response to endogenous stimulus;GO:0009888//tissue development;GO:0090627//plant epidermal cell …
Gh_D13G0171	1.81	1.89	1.88	2.24	0.79	0.81	0.73	0.79	1.01	3.25	3.24	3.29	1.91	1.98	3.02	1.51	1.36	0.6	44	47.3	41	51.12	23.19	19	19	16.36	22.51	81.43	64.47	77.33	53.97	41.31	57.49	35.51	32.38	13.14	Gh_D13G0171	Gh_D13G0171	Auxin transporter protein 1 [Source:UniProtKB/Swiss-Prot;Acc:Q96247]	Environmental Information Processing	Signal transduction	ko04075//Plant hormone signal transduction	GO:0071944//cell periphery;GO:0043227//membrane-bounded organelle;GO:0016021//integral component of membrane;GO:0005794//Golgi apparatus;GO:0005886//plasma membrane;GO:0016020//membrane;GO:0012505//endomembrane system;GO:0044425//membrane part;GO:0044464//cell part;GO:0043229//intracellular organelle;GO:0044444//cytoplasmic part;GO:0005623//cell;GO:0043226//organelle;GO:0044424//intracellular par…	GO:0005215//transporter activity;GO:0015075//ion transmembrane transporter activity;GO:0015293//symporter activity;GO:0080161//auxin transmembrane transporter activity;GO:0005342//organic acid transmembrane transporter activity;GO:0022857//transmembrane transporter activity;GO:0022891//substrate-specific transmembrane transporter activity;GO:0022804//active transmembrane transporter activity;GO:0…	GO:0044767//single-organism developmental process;GO:0009719//response to endogenous stimulus;GO:0048646//anatomical structure formation involved in morphogenesis;GO:0048527//lateral root development;GO:0009734//auxin-activated signaling pathway;GO:0055085//transmembrane transport;GO:0071495//cellular response to endogenous stimulus;GO:0009888//tissue development;GO:0090627//plant epidermal cell …
Gh_A01G1578	9.61	8.4	6.64	7.77	8.9	8.73	7.41	12.28	10.62	10.1	6.43	7.21	4.9	5.99	7.21	8.55	7.81	5.9	175.53	158	109	133	194.98	153	145	191	177	190	96	127	104	94	103	151	139	97.64	Gh_A01G1578	Gh_A01G1578	Transcription factor TGA7 [Source:UniProtKB/Swiss-Prot;Acc:Q93ZE2]	Environmental Information Processing	Signal transduction	ko04075//Plant hormone signal transduction	GO:0043229//intracellular organelle;GO:0043231//intracellular membrane-bounded organelle;GO:0044424//intracellular part;GO:0005634//nucleus;GO:0005623//cell;GO:0043227//membrane-bounded organelle;GO:0043226//organelle;GO:0005622//intracellular;GO:0044464//cell part	GO:0001071//nucleic acid binding transcription factor activity;GO:0003700//sequence-specific DNA binding transcription factor activity;GO:0005488//binding;GO:0003676//nucleic acid binding;GO:0043565//sequence-specific DNA binding;GO:1901363//heterocyclic compound binding;GO:0003677//DNA binding;GO:0097159//organic cyclic compound binding	GO:0031323//regulation of cellular metabolic process;GO:0010556//regulation of macromolecule biosynthetic process;GO:2001141//regulation of RNA biosynthetic process;GO:0006725//cellular aromatic compound metabolic process;GO:1901576//organic substance biosynthetic process;GO:0009617//response to bacterium;GO:0009058//biosynthetic process;GO:0097659//nucleic acid-templated transcription;GO:0044237…
Gh_A01G1655	0	0	0	0.04	0	0	0	0	0	0	0	0	0	0	0	0	0	0	0	0	0	1	0	0	0	0	0	0	0	0	0	0	0	0	0	0	Gh_A01G1655	Gh_A01G1655	bZIP transcription factor family protein [Source:TAIR;Acc:AT5G06839]	Environmental Information Processing	Signal transduction	ko04075//Plant hormone signal transduction	-	GO:0005488//binding;GO:1901363//heterocyclic compound binding;GO:0097159//organic cyclic compound binding;GO:0003676//nucleic acid binding;GO:0003700//sequence-specific DNA binding transcription factor activity;GO:0001071//nucleic acid binding transcription factor activity;GO:0003677//DNA binding;GO:0043565//sequence-specific DNA binding	GO:0097659//nucleic acid-templated transcription;GO:0009058//biosynthetic process;GO:0034641//cellular nitrogen compound metabolic process;GO:0051171//regulation of nitrogen compound metabolic process;GO:0006725//cellular aromatic compound metabolic process;GO:0019219//regulation of nucleobase-containing compound metabolic process;GO:0018130//heterocycle biosynthetic process;GO:0006355//regulatio…
Gh_A02G0775	3.85	7.42	4.92	7.54	3.62	4.49	3.67	3.98	3.98	2.3	1.52	1.83	1.12	1.25	0.5	2.58	1.76	2.01	68.38	135.69	78.39	125.46	77	76.44	69.84	60.15	64.44	42	22	31.34	23	19	7	44.36	30.5	32.32	Gh_A02G0775	Gh_A02G0775	Transcription factor TGA7 [Source:UniProtKB/Swiss-Prot;Acc:Q93ZE2]	Environmental Information Processing	Signal transduction	ko04075//Plant hormone signal transduction	GO:0043229//intracellular organelle;GO:0043231//intracellular membrane-bounded organelle;GO:0044424//intracellular part;GO:0005634//nucleus;GO:0005623//cell;GO:0043227//membrane-bounded organelle;GO:0043226//organelle;GO:0005622//intracellular;GO:0044464//cell part	GO:0001071//nucleic acid binding transcription factor activity;GO:0003700//sequence-specific DNA binding transcription factor activity;GO:0005488//binding;GO:0003676//nucleic acid binding;GO:0043565//sequence-specific DNA binding;GO:1901363//heterocyclic compound binding;GO:0003677//DNA binding;GO:0097159//organic cyclic compound binding	GO:0031323//regulation of cellular metabolic process;GO:0010556//regulation of macromolecule biosynthetic process;GO:2001141//regulation of RNA biosynthetic process;GO:0006725//cellular aromatic compound metabolic process;GO:1901576//organic substance biosynthetic process;GO:0009617//response to bacterium;GO:0009058//biosynthetic process;GO:0097659//nucleic acid-templated transcription;GO:0044237…
Gh_A06G0329	28.74	30.56	19.4	23.79	27.6	30.33	29.73	30.98	30.92	18.87	17.52	16.98	13.28	16.18	11.74	18.07	16.82	17.89	529.13	579.7	321	410.68	609.74	536	586.53	485.84	519.94	358	263.61	301.68	284	256	169	322	302	298.74	Gh_A06G0329	Gh_A06G0329	Transcription factor TGA7 [Source:UniProtKB/Swiss-Prot;Acc:Q93ZE2]	Environmental Information Processing	Signal transduction	ko04075//Plant hormone signal transduction	GO:0043229//intracellular organelle;GO:0043231//intracellular membrane-bounded organelle;GO:0044424//intracellular part;GO:0005634//nucleus;GO:0005623//cell;GO:0043227//membrane-bounded organelle;GO:0043226//organelle;GO:0005622//intracellular;GO:0044464//cell part	GO:0001071//nucleic acid binding transcription factor activity;GO:0003700//sequence-specific DNA binding transcription factor activity;GO:0005488//binding;GO:0003676//nucleic acid binding;GO:0043565//sequence-specific DNA binding;GO:1901363//heterocyclic compound binding;GO:0003677//DNA binding;GO:0097159//organic cyclic compound binding	GO:0031323//regulation of cellular metabolic process;GO:0010556//regulation of macromolecule biosynthetic process;GO:2001141//regulation of RNA biosynthetic process;GO:0006725//cellular aromatic compound metabolic process;GO:1901576//organic substance biosynthetic process;GO:0009617//response to bacterium;GO:0009058//biosynthetic process;GO:0097659//nucleic acid-templated transcription;GO:0044237…
Gh_A07G1001	0.33	0.68	0.4	0.53	0.24	0.47	0.35	0.97	1.48	0.6	0.71	0.39	0.57	0.82	0.32	0.21	0.47	0.27	8	17	8.62	12	7	10.91	8.94	20.01	32.63	14.88	14	9	16	17	6	5	11	6	Gh_A07G1001	Gh_A07G1001	bZIP transcription factor family protein [Source:TAIR;Acc:AT1G08320]	Environmental Information Processing	Signal transduction	ko04075//Plant hormone signal transduction	-	GO:0003677//DNA binding;GO:0001071//nucleic acid binding transcription factor activity;GO:0003700//sequence-specific DNA binding transcription factor activity;GO:0097159//organic cyclic compound binding;GO:0005488//binding;GO:0043565//sequence-specific DNA binding;GO:0003676//nucleic acid binding;GO:1901363//heterocyclic compound binding	GO:0006351//transcription, DNA-templated;GO:0009058//biosynthetic process;GO:0090304//nucleic acid metabolic process;GO:0050789//regulation of biological process;GO:0051171//regulation of nitrogen compound metabolic process;GO:0050794//regulation of cellular process;GO:0034654//nucleobase-containing compound biosynthetic process;GO:1901576//organic substance biosynthetic process;GO:0019222//regul…
Gh_A09G0903	0	0.13	0.22	0.3	0.03	0.04	1.83	1.83	2.01	0.15	0.1	0.08	0.07	0.09	0	0.12	0.04	0.83	0	3.33	5	7	1	1	49	39	46	4	2	2	2	2	0	3	1	18.96	Gh_A09G0903	Gh_A09G0903	bZIP transcription factor family protein [Source:TAIR;Acc:AT1G08320]	Environmental Information Processing	Signal transduction	ko04075//Plant hormone signal transduction	-	GO:0003677//DNA binding;GO:0001071//nucleic acid binding transcription factor activity;GO:0003700//sequence-specific DNA binding transcription factor activity;GO:0097159//organic cyclic compound binding;GO:0005488//binding;GO:0043565//sequence-specific DNA binding;GO:0003676//nucleic acid binding;GO:1901363//heterocyclic compound binding	GO:0006351//transcription, DNA-templated;GO:0009058//biosynthetic process;GO:0090304//nucleic acid metabolic process;GO:0050789//regulation of biological process;GO:0051171//regulation of nitrogen compound metabolic process;GO:0050794//regulation of cellular process;GO:0034654//nucleobase-containing compound biosynthetic process;GO:1901576//organic substance biosynthetic process;GO:0019222//regul…
Gh_A09G1184	0	0	0.09	0	0	0	0.07	0	0	0	0	0	0	0	0	0	0	0	0	0	2	0	0	0	2	0	0	0	0	0	0	0	0	0	0	0	Gh_A09G1184	Gh_A09G1184	bZIP transcription factor family protein [Source:TAIR;Acc:AT5G06839]	Environmental Information Processing	Signal transduction	ko04075//Plant hormone signal transduction	-	GO:0005488//binding;GO:1901363//heterocyclic compound binding;GO:0097159//organic cyclic compound binding;GO:0003676//nucleic acid binding;GO:0003700//sequence-specific DNA binding transcription factor activity;GO:0001071//nucleic acid binding transcription factor activity;GO:0003677//DNA binding;GO:0043565//sequence-specific DNA binding	GO:0097659//nucleic acid-templated transcription;GO:0009058//biosynthetic process;GO:0034641//cellular nitrogen compound metabolic process;GO:0051171//regulation of nitrogen compound metabolic process;GO:0006725//cellular aromatic compound metabolic process;GO:0019219//regulation of nucleobase-containing compound metabolic process;GO:0018130//heterocycle biosynthetic process;GO:0006355//regulatio…
Gh_A10G0769	0.62	2.04	0.73	1.04	1.78	2.22	3.07	4.39	4.15	1.08	0.66	0.89	1.44	0.9	1.11	1.59	1.49	2.04	11.5	38.82	12.09	18.04	39.47	39.38	60.92	69.19	70.25	20.61	9.95	15.91	31.02	14.34	16.09	28.54	26.91	34.3	Gh_A10G0769	Gh_A10G0769	Transcription factor TGA4 [Source:UniProtKB/Swiss-Prot;Acc:Q39162]	Environmental Information Processing	Signal transduction	ko04075//Plant hormone signal transduction	GO:0043227//membrane-bounded organelle;GO:0043231//intracellular membrane-bounded organelle;GO:0044424//intracellular part;GO:0043226//organelle;GO:0005623//cell;GO:0044464//cell part;GO:0005634//nucleus;GO:0005622//intracellular;GO:0043229//intracellular organelle	GO:0003677//DNA binding;GO:0001071//nucleic acid binding transcription factor activity;GO:0043565//sequence-specific DNA binding;GO:0097159//organic cyclic compound binding;GO:1901363//heterocyclic compound binding;GO:0005488//binding;GO:0003700//sequence-specific DNA binding transcription factor activity;GO:0003676//nucleic acid binding	GO:0046483//heterocycle metabolic process;GO:0009889//regulation of biosynthetic process;GO:0006351//transcription, DNA-templated;GO:0034641//cellular nitrogen compound metabolic process;GO:0016070//RNA metabolic process;GO:0044238//primary metabolic process;GO:0009987//cellular process;GO:1901576//organic substance biosynthetic process;GO:1903506//regulation of nucleic acid-templated transcripti…
Gh_A10G1678	12.99	12.96	13.98	14.68	14.9	12.38	13.14	15.08	16.6	12.34	12.91	14.27	11.38	12.39	14.3	12.09	10.51	9.35	301.96	310.27	292.04	319.92	415.67	276.25	327.34	298.65	352.43	295.62	245.21	320.15	307.19	247.6	259.86	272.04	238.26	197.08	Gh_A10G1678	Gh_A10G1678	Transcription factor TGA6 [Source:UniProtKB/Swiss-Prot;Acc:Q39140]	Environmental Information Processing	Signal transduction	ko04075//Plant hormone signal transduction	GO:0005634//nucleus;GO:0005623//cell;GO:0005622//intracellular;GO:0044464//cell part;GO:0044424//intracellular part;GO:0043231//intracellular membrane-bounded organelle;GO:0043227//membrane-bounded organelle;GO:0043229//intracellular organelle;GO:0043226//organelle	GO:0001071//nucleic acid binding transcription factor activity;GO:0043565//sequence-specific DNA binding;GO:0003677//DNA binding;GO:0043169//cation binding;GO:0003676//nucleic acid binding;GO:0003824//catalytic activity;GO:1901363//heterocyclic compound binding;GO:0005488//binding;GO:0043167//ion binding;GO:0003700//sequence-specific DNA binding transcription factor activity;GO:0097159//organic c…	GO:0065007//biological regulation;GO:0010556//regulation of macromolecule biosynthetic process;GO:1901360//organic cyclic compound metabolic process;GO:0008152//metabolic process;GO:0009605//response to external stimulus;GO:0043170//macromolecule metabolic process;GO:0019222//regulation of metabolic process;GO:0090304//nucleic acid metabolic process;GO:0009058//biosynthetic process;GO:0006725//ce…
Gh_A11G2749	22.6	17.87	20.16	17.2	23.05	20.77	27.03	29.25	24	20.4	19.63	20.14	18.23	18.54	19.49	16.39	19.15	15.93	538.09	438.28	431.57	383.99	658.54	474.58	689.82	593.29	521.85	500.59	382	462.73	504.18	379.39	362.83	377.81	444.76	344.05	Gh_A11G2749	Gh_A11G2749	Transcription factor TGA2 [Source:UniProtKB/Swiss-Prot;Acc:P43273]	Environmental Information Processing	Signal transduction	ko04075//Plant hormone signal transduction	GO:0044424//intracellular part;GO:0043231//intracellular membrane-bounded organelle;GO:0005623//cell;GO:0005634//nucleus;GO:0005622//intracellular;GO:0043226//organelle;GO:0044464//cell part;GO:0043229//intracellular organelle;GO:0005737//cytoplasm;GO:0043227//membrane-bounded organelle	GO:0003677//DNA binding;GO:0003700//sequence-specific DNA binding transcription factor activity;GO:0097159//organic cyclic compound binding;GO:0005488//binding;GO:0003676//nucleic acid binding;GO:0043565//sequence-specific DNA binding;GO:0001071//nucleic acid binding transcription factor activity;GO:1901363//heterocyclic compound binding	GO:0023052//signaling;GO:0098542//defense response to other organism;GO:0016070//RNA metabolic process;GO:0009987//cellular process;GO:1903508//positive regulation of nucleic acid-templated transcription;GO:0048522//positive regulation of cellular process;GO:0006725//cellular aromatic compound metabolic process;GO:0034654//nucleobase-containing compound biosynthetic process;GO:0009626//plant-type…
Gh_A12G1545	0.63	0.73	0.19	0.45	0.32	0.79	0.68	0.45	0.44	0.53	0.72	0.69	0.55	0.25	0.54	0.24	0.43	0.47	15	17.89	4	10	9.21	18	17.29	9	9.47	13	14	15.64	15	5	10	5.4	10	10	Gh_A12G1545	Gh_A12G1545	Transcription factor PERIANTHIA [Source:UniProtKB/Swiss-Prot;Acc:Q9SX27]	Environmental Information Processing	Signal transduction	ko04075//Plant hormone signal transduction	GO:0005622//intracellular;GO:0044424//intracellular part;GO:0044464//cell part;GO:0043227//membrane-bounded organelle;GO:0043231//intracellular membrane-bounded organelle;GO:0005634//nucleus;GO:0043226//organelle;GO:0005623//cell;GO:0043229//intracellular organelle	GO:0043565//sequence-specific DNA binding;GO:0001071//nucleic acid binding transcription factor activity;GO:1901363//heterocyclic compound binding;GO:0097159//organic cyclic compound binding;GO:0003677//DNA binding;GO:0003700//sequence-specific DNA binding transcription factor activity;GO:0005488//binding;GO:0003676//nucleic acid binding	GO:0050794//regulation of cellular process;GO:0050789//regulation of biological process;GO:0008152//metabolic process;GO:1901360//organic cyclic compound metabolic process;GO:1901576//organic substance biosynthetic process;GO:0009909//regulation of flower development;GO:0009059//macromolecule biosynthetic process;GO:0043170//macromolecule metabolic process;GO:0097659//nucleic acid-templated trans…
Gh_A13G0002	10.85	9.63	8.54	10.28	11.06	8.1	10.38	12.27	12.47	11.29	11.9	12.52	9.88	11.62	7.99	9.72	10.98	9.59	223.12	204.13	157.91	198.29	273	160	228.86	215.09	234.17	239.44	200	248.56	236	205.54	128.5	193.58	220.3	179	Gh_A13G0002	Gh_A13G0002	Transcription factor TGA6 [Source:UniProtKB/Swiss-Prot;Acc:Q39140]	Environmental Information Processing	Signal transduction	ko04075//Plant hormone signal transduction	GO:0005634//nucleus;GO:0005623//cell;GO:0005622//intracellular;GO:0044464//cell part;GO:0044424//intracellular part;GO:0043231//intracellular membrane-bounded organelle;GO:0043227//membrane-bounded organelle;GO:0043229//intracellular organelle;GO:0043226//organelle	GO:0001071//nucleic acid binding transcription factor activity;GO:0043565//sequence-specific DNA binding;GO:0003677//DNA binding;GO:0043169//cation binding;GO:0003676//nucleic acid binding;GO:0003824//catalytic activity;GO:1901363//heterocyclic compound binding;GO:0005488//binding;GO:0043167//ion binding;GO:0003700//sequence-specific DNA binding transcription factor activity;GO:0097159//organic c…	GO:0065007//biological regulation;GO:0010556//regulation of macromolecule biosynthetic process;GO:1901360//organic cyclic compound metabolic process;GO:0008152//metabolic process;GO:0009605//response to external stimulus;GO:0043170//macromolecule metabolic process;GO:0019222//regulation of metabolic process;GO:0090304//nucleic acid metabolic process;GO:0009058//biosynthetic process;GO:0006725//ce…
Gh_A13G0027	5.31	4.12	4.49	4.31	3.85	5.22	5.8	5.13	5.29	4.46	4.2	4.5	2.39	3.47	4.74	2.38	3.38	2.07	104.56	83.68	79.44	79.5	91.03	98.67	122.36	86.13	95.18	90.5	67.56	85.61	54.69	58.75	73.03	45.45	64.84	36.96	Gh_A13G0027	Gh_A13G0027	Transcription factor TGA6 [Source:UniProtKB/Swiss-Prot;Acc:Q39140]	Environmental Information Processing	Signal transduction	ko04075//Plant hormone signal transduction	GO:0005634//nucleus;GO:0005623//cell;GO:0005622//intracellular;GO:0044464//cell part;GO:0044424//intracellular part;GO:0043231//intracellular membrane-bounded organelle;GO:0043227//membrane-bounded organelle;GO:0043229//intracellular organelle;GO:0043226//organelle	GO:0001071//nucleic acid binding transcription factor activity;GO:0043565//sequence-specific DNA binding;GO:0003677//DNA binding;GO:0043169//cation binding;GO:0003676//nucleic acid binding;GO:0003824//catalytic activity;GO:1901363//heterocyclic compound binding;GO:0005488//binding;GO:0043167//ion binding;GO:0003700//sequence-specific DNA binding transcription factor activity;GO:0097159//organic c…	GO:0065007//biological regulation;GO:0010556//regulation of macromolecule biosynthetic process;GO:1901360//organic cyclic compound metabolic process;GO:0008152//metabolic process;GO:0009605//response to external stimulus;GO:0043170//macromolecule metabolic process;GO:0019222//regulation of metabolic process;GO:0090304//nucleic acid metabolic process;GO:0009058//biosynthetic process;GO:0006725//ce…
Gh_A13G2141	0	0	0	0	0	0	0	0	0	0.17	0	0.09	0	0	0	0	0	0	0	0	0	0	0	0	0	0	0	4	0	2	0	0	0	0	0	0	Gh_A13G2141	Gh_A13G2141	Transcription factor PERIANTHIA [Source:UniProtKB/Swiss-Prot;Acc:Q9SX27]	Environmental Information Processing	Signal transduction	ko04075//Plant hormone signal transduction	GO:0005622//intracellular;GO:0044424//intracellular part;GO:0044464//cell part;GO:0043227//membrane-bounded organelle;GO:0043231//intracellular membrane-bounded organelle;GO:0005634//nucleus;GO:0043226//organelle;GO:0005623//cell;GO:0043229//intracellular organelle	GO:0043565//sequence-specific DNA binding;GO:0001071//nucleic acid binding transcription factor activity;GO:1901363//heterocyclic compound binding;GO:0097159//organic cyclic compound binding;GO:0003677//DNA binding;GO:0003700//sequence-specific DNA binding transcription factor activity;GO:0005488//binding;GO:0003676//nucleic acid binding	GO:0050794//regulation of cellular process;GO:0050789//regulation of biological process;GO:0008152//metabolic process;GO:1901360//organic cyclic compound metabolic process;GO:1901576//organic substance biosynthetic process;GO:0009909//regulation of flower development;GO:0009059//macromolecule biosynthetic process;GO:0043170//macromolecule metabolic process;GO:0097659//nucleic acid-templated trans…
Gh_D01G1881	5.61	4.47	4.27	3.74	4.57	4	4.8	6.37	5.58	3.99	3.08	4.03	1.93	2.36	4.13	2.26	3.83	3.28	102.47	84	70	64	100.02	70	94	99	93	75	46	71	41	37	59	40	68.15	54.36	Gh_D01G1881	Gh_D01G1881	Transcription factor TGA7 [Source:UniProtKB/Swiss-Prot;Acc:Q93ZE2]	Environmental Information Processing	Signal transduction	ko04075//Plant hormone signal transduction	GO:0043229//intracellular organelle;GO:0043231//intracellular membrane-bounded organelle;GO:0044424//intracellular part;GO:0005634//nucleus;GO:0005623//cell;GO:0043227//membrane-bounded organelle;GO:0043226//organelle;GO:0005622//intracellular;GO:0044464//cell part	GO:0001071//nucleic acid binding transcription factor activity;GO:0003700//sequence-specific DNA binding transcription factor activity;GO:0005488//binding;GO:0003676//nucleic acid binding;GO:0043565//sequence-specific DNA binding;GO:1901363//heterocyclic compound binding;GO:0003677//DNA binding;GO:0097159//organic cyclic compound binding	GO:0031323//regulation of cellular metabolic process;GO:0010556//regulation of macromolecule biosynthetic process;GO:2001141//regulation of RNA biosynthetic process;GO:0006725//cellular aromatic compound metabolic process;GO:1901576//organic substance biosynthetic process;GO:0009617//response to bacterium;GO:0009058//biosynthetic process;GO:0097659//nucleic acid-templated transcription;GO:0044237…
Gh_D01G1903	0	0	0	0	0	0	0	0	0	0	0	0	0	0	0	0	0	0	0	0	0	0	0	0	0	0	0	0	0	0	0	0	0	0	0	0	Gh_D01G1903	Gh_D01G1903	bZIP transcription factor family protein [Source:TAIR;Acc:AT5G06839]	Environmental Information Processing	Signal transduction	ko04075//Plant hormone signal transduction	-	GO:0005488//binding;GO:1901363//heterocyclic compound binding;GO:0097159//organic cyclic compound binding;GO:0003676//nucleic acid binding;GO:0003700//sequence-specific DNA binding transcription factor activity;GO:0001071//nucleic acid binding transcription factor activity;GO:0003677//DNA binding;GO:0043565//sequence-specific DNA binding	GO:0097659//nucleic acid-templated transcription;GO:0009058//biosynthetic process;GO:0034641//cellular nitrogen compound metabolic process;GO:0051171//regulation of nitrogen compound metabolic process;GO:0006725//cellular aromatic compound metabolic process;GO:0019219//regulation of nucleobase-containing compound metabolic process;GO:0018130//heterocycle biosynthetic process;GO:0006355//regulatio…
Gh_D02G0824	6.23	12.32	9.48	8.84	6.31	5.77	5.41	6.39	5.06	2.62	3.3	3.49	2.27	1.53	0.88	4.66	2.62	3.14	108.62	221.31	148.61	144.54	132	96.56	101.16	94.85	80.56	47	47	58.66	46	23	12	78.64	44.5	49.68	Gh_D02G0824	Gh_D02G0824	Transcription factor TGA7 [Source:UniProtKB/Swiss-Prot;Acc:Q93ZE2]	Environmental Information Processing	Signal transduction	ko04075//Plant hormone signal transduction	GO:0043229//intracellular organelle;GO:0043231//intracellular membrane-bounded organelle;GO:0044424//intracellular part;GO:0005634//nucleus;GO:0005623//cell;GO:0043227//membrane-bounded organelle;GO:0043226//organelle;GO:0005622//intracellular;GO:0044464//cell part	GO:0001071//nucleic acid binding transcription factor activity;GO:0003700//sequence-specific DNA binding transcription factor activity;GO:0005488//binding;GO:0003676//nucleic acid binding;GO:0043565//sequence-specific DNA binding;GO:1901363//heterocyclic compound binding;GO:0003677//DNA binding;GO:0097159//organic cyclic compound binding	GO:0031323//regulation of cellular metabolic process;GO:0010556//regulation of macromolecule biosynthetic process;GO:2001141//regulation of RNA biosynthetic process;GO:0006725//cellular aromatic compound metabolic process;GO:1901576//organic substance biosynthetic process;GO:0009617//response to bacterium;GO:0009058//biosynthetic process;GO:0097659//nucleic acid-templated transcription;GO:0044237…
Gh_D05G0822	1.94	1.48	1.65	1.14	1.46	1.01	1.64	1.52	1.73	1.66	0.93	1.46	1.07	0.8	0.88	0.86	1.17	1.14	51	40	39	28	46	25.45	46	34	41.53	45	20	37	32.66	18	18	21.73	30	27	Gh_D05G0822	Gh_D05G0822	bZIP transcription factor family protein [Source:TAIR;Acc:AT1G08320]	Environmental Information Processing	Signal transduction	ko04075//Plant hormone signal transduction	-	GO:0003677//DNA binding;GO:0001071//nucleic acid binding transcription factor activity;GO:0003700//sequence-specific DNA binding transcription factor activity;GO:0097159//organic cyclic compound binding;GO:0005488//binding;GO:0043565//sequence-specific DNA binding;GO:0003676//nucleic acid binding;GO:1901363//heterocyclic compound binding	GO:0006351//transcription, DNA-templated;GO:0009058//biosynthetic process;GO:0090304//nucleic acid metabolic process;GO:0050789//regulation of biological process;GO:0051171//regulation of nitrogen compound metabolic process;GO:0050794//regulation of cellular process;GO:0034654//nucleobase-containing compound biosynthetic process;GO:1901576//organic substance biosynthetic process;GO:0019222//regul…
Gh_D06G0331	0.44	0.28	0.97	0.31	0.12	0.3	0.54	0.17	0.16	0.7	0.18	0.9	0.62	0.51	0.93	0.3	0.45	0.32	3	2	6	2	1	2	4	1	1	5	1	6	5	3	5	2	3	2	Gh_D06G0331	Gh_D06G0331	Transcription factor PERIANTHIA [Source:UniProtKB/Swiss-Prot;Acc:Q9SX27]	Environmental Information Processing	Signal transduction	ko04075//Plant hormone signal transduction	GO:0005622//intracellular;GO:0044424//intracellular part;GO:0044464//cell part;GO:0043227//membrane-bounded organelle;GO:0043231//intracellular membrane-bounded organelle;GO:0005634//nucleus;GO:0043226//organelle;GO:0005623//cell;GO:0043229//intracellular organelle	GO:0043565//sequence-specific DNA binding;GO:0001071//nucleic acid binding transcription factor activity;GO:1901363//heterocyclic compound binding;GO:0097159//organic cyclic compound binding;GO:0003677//DNA binding;GO:0003700//sequence-specific DNA binding transcription factor activity;GO:0005488//binding;GO:0003676//nucleic acid binding	GO:0050794//regulation of cellular process;GO:0050789//regulation of biological process;GO:0008152//metabolic process;GO:1901360//organic cyclic compound metabolic process;GO:1901576//organic substance biosynthetic process;GO:0009909//regulation of flower development;GO:0009059//macromolecule biosynthetic process;GO:0043170//macromolecule metabolic process;GO:0097659//nucleic acid-templated trans…
Gh_D06G0357	12.97	13.36	10.15	11.2	9.83	10.58	9.25	12.64	11.19	10.17	11.39	7.9	4.72	7.96	8.75	7.86	7.3	6.24	238.87	253.3	168	193.32	217.26	187	182.47	198.16	188.06	193	171.39	140.32	101	126	126	140	131	104.26	Gh_D06G0357	Gh_D06G0357	Transcription factor TGA7 [Source:UniProtKB/Swiss-Prot;Acc:Q93ZE2]	Environmental Information Processing	Signal transduction	ko04075//Plant hormone signal transduction	GO:0043229//intracellular organelle;GO:0043231//intracellular membrane-bounded organelle;GO:0044424//intracellular part;GO:0005634//nucleus;GO:0005623//cell;GO:0043227//membrane-bounded organelle;GO:0043226//organelle;GO:0005622//intracellular;GO:0044464//cell part	GO:0001071//nucleic acid binding transcription factor activity;GO:0003700//sequence-specific DNA binding transcription factor activity;GO:0005488//binding;GO:0003676//nucleic acid binding;GO:0043565//sequence-specific DNA binding;GO:1901363//heterocyclic compound binding;GO:0003677//DNA binding;GO:0097159//organic cyclic compound binding	GO:0031323//regulation of cellular metabolic process;GO:0010556//regulation of macromolecule biosynthetic process;GO:2001141//regulation of RNA biosynthetic process;GO:0006725//cellular aromatic compound metabolic process;GO:1901576//organic substance biosynthetic process;GO:0009617//response to bacterium;GO:0009058//biosynthetic process;GO:0097659//nucleic acid-templated transcription;GO:0044237…
Gh_D07G1078	0.04	0	0.25	0	0	0.05	0.39	0.19	0.15	0.09	0.05	0	0	0	0	0	0.13	0	1	0	5.38	0	0	1.09	10.06	3.99	3.37	2.12	1	0	0	0	0	0	3	0	Gh_D07G1078	Gh_D07G1078	bZIP transcription factor family protein [Source:TAIR;Acc:AT1G08320]	Environmental Information Processing	Signal transduction	ko04075//Plant hormone signal transduction	-	GO:0003677//DNA binding;GO:0001071//nucleic acid binding transcription factor activity;GO:0003700//sequence-specific DNA binding transcription factor activity;GO:0097159//organic cyclic compound binding;GO:0005488//binding;GO:0043565//sequence-specific DNA binding;GO:0003676//nucleic acid binding;GO:1901363//heterocyclic compound binding	GO:0006351//transcription, DNA-templated;GO:0009058//biosynthetic process;GO:0090304//nucleic acid metabolic process;GO:0050789//regulation of biological process;GO:0051171//regulation of nitrogen compound metabolic process;GO:0050794//regulation of cellular process;GO:0034654//nucleobase-containing compound biosynthetic process;GO:1901576//organic substance biosynthetic process;GO:0019222//regul…
Gh_D07G1114	0	0	0	0	0	0	0	0	0	0	0	0	0	0	0	0	0	0	0	0	0	0	0	0	0	0	0	0	0	0	0	0	0	0	0	0	Gh_D07G1114	Gh_D07G1114	Transcription factor PERIANTHIA [Source:UniProtKB/Swiss-Prot;Acc:Q9SX27]	Environmental Information Processing	Signal transduction	ko04075//Plant hormone signal transduction	GO:0005622//intracellular;GO:0044424//intracellular part;GO:0044464//cell part;GO:0043227//membrane-bounded organelle;GO:0043231//intracellular membrane-bounded organelle;GO:0005634//nucleus;GO:0043226//organelle;GO:0005623//cell;GO:0043229//intracellular organelle	GO:0043565//sequence-specific DNA binding;GO:0001071//nucleic acid binding transcription factor activity;GO:1901363//heterocyclic compound binding;GO:0097159//organic cyclic compound binding;GO:0003677//DNA binding;GO:0003700//sequence-specific DNA binding transcription factor activity;GO:0005488//binding;GO:0003676//nucleic acid binding	GO:0050794//regulation of cellular process;GO:0050789//regulation of biological process;GO:0008152//metabolic process;GO:1901360//organic cyclic compound metabolic process;GO:1901576//organic substance biosynthetic process;GO:0009909//regulation of flower development;GO:0009059//macromolecule biosynthetic process;GO:0043170//macromolecule metabolic process;GO:0097659//nucleic acid-templated trans…
Gh_D09G0928	0.04	0.06	0	0.17	0.03	0.04	0.6	0.19	0.48	0	0	0	0	0	0	0	0.04	0.44	1	1.67	0	4	1	1	16	4	11	0	0	0	0	0	0	0	1	10.04	Gh_D09G0928	Gh_D09G0928	bZIP transcription factor family protein [Source:TAIR;Acc:AT1G08320]	Environmental Information Processing	Signal transduction	ko04075//Plant hormone signal transduction	-	GO:0003677//DNA binding;GO:0001071//nucleic acid binding transcription factor activity;GO:0003700//sequence-specific DNA binding transcription factor activity;GO:0097159//organic cyclic compound binding;GO:0005488//binding;GO:0043565//sequence-specific DNA binding;GO:0003676//nucleic acid binding;GO:1901363//heterocyclic compound binding	GO:0006351//transcription, DNA-templated;GO:0009058//biosynthetic process;GO:0090304//nucleic acid metabolic process;GO:0050789//regulation of biological process;GO:0051171//regulation of nitrogen compound metabolic process;GO:0050794//regulation of cellular process;GO:0034654//nucleobase-containing compound biosynthetic process;GO:1901576//organic substance biosynthetic process;GO:0019222//regul…
Gh_D09G1188	0	0	0.04	0	0	0	0.04	0	0	0	0	0	0	0	0	0	0	0	0	0	1	0	0	0	1	0	0	0	0	0	0	0	0	0	0	0	Gh_D09G1188	Gh_D09G1188	bZIP transcription factor family protein [Source:TAIR;Acc:AT5G06839]	Environmental Information Processing	Signal transduction	ko04075//Plant hormone signal transduction	-	GO:0005488//binding;GO:1901363//heterocyclic compound binding;GO:0097159//organic cyclic compound binding;GO:0003676//nucleic acid binding;GO:0003700//sequence-specific DNA binding transcription factor activity;GO:0001071//nucleic acid binding transcription factor activity;GO:0003677//DNA binding;GO:0043565//sequence-specific DNA binding	GO:0097659//nucleic acid-templated transcription;GO:0009058//biosynthetic process;GO:0034641//cellular nitrogen compound metabolic process;GO:0051171//regulation of nitrogen compound metabolic process;GO:0006725//cellular aromatic compound metabolic process;GO:0019219//regulation of nucleobase-containing compound metabolic process;GO:0018130//heterocycle biosynthetic process;GO:0006355//regulatio…
Gh_D10G0995	2.37	3.12	2.13	3.17	3.09	2.83	2.51	4.09	5.86	0.58	1.76	1.29	1.77	0.98	0.36	1.26	2.71	4.26	49.5	67.18	39.91	61.96	77.53	56.62	56.08	72.81	111.75	12.39	30.05	26.09	42.98	17.66	5.91	25.46	55.09	80.7	Gh_D10G0995	Gh_D10G0995	Transcription factor TGA4 [Source:UniProtKB/Swiss-Prot;Acc:Q39162]	Environmental Information Processing	Signal transduction	ko04075//Plant hormone signal transduction	GO:0043227//membrane-bounded organelle;GO:0043231//intracellular membrane-bounded organelle;GO:0044424//intracellular part;GO:0043226//organelle;GO:0005623//cell;GO:0044464//cell part;GO:0005634//nucleus;GO:0005622//intracellular;GO:0043229//intracellular organelle	GO:0003677//DNA binding;GO:0001071//nucleic acid binding transcription factor activity;GO:0043565//sequence-specific DNA binding;GO:0097159//organic cyclic compound binding;GO:1901363//heterocyclic compound binding;GO:0005488//binding;GO:0003700//sequence-specific DNA binding transcription factor activity;GO:0003676//nucleic acid binding	GO:0046483//heterocycle metabolic process;GO:0009889//regulation of biosynthetic process;GO:0006351//transcription, DNA-templated;GO:0034641//cellular nitrogen compound metabolic process;GO:0016070//RNA metabolic process;GO:0044238//primary metabolic process;GO:0009987//cellular process;GO:1901576//organic substance biosynthetic process;GO:1903506//regulation of nucleic acid-templated transcripti…
Gh_D10G1937	11.23	10.26	9.28	10.1	9.76	10.48	8.82	13	10.91	11.03	8.1	10.07	7.47	8.93	9.96	8.75	7.93	6.16	261.04	245.73	193.96	220.08	272.33	233.75	219.66	257.35	231.57	264.38	153.79	225.85	201.81	178.4	181.14	196.96	179.74	129.92	Gh_D10G1937	Gh_D10G1937	Transcription factor TGA6 [Source:UniProtKB/Swiss-Prot;Acc:Q39140]	Environmental Information Processing	Signal transduction	ko04075//Plant hormone signal transduction	GO:0005634//nucleus;GO:0005623//cell;GO:0005622//intracellular;GO:0044464//cell part;GO:0044424//intracellular part;GO:0043231//intracellular membrane-bounded organelle;GO:0043227//membrane-bounded organelle;GO:0043229//intracellular organelle;GO:0043226//organelle	GO:0001071//nucleic acid binding transcription factor activity;GO:0043565//sequence-specific DNA binding;GO:0003677//DNA binding;GO:0043169//cation binding;GO:0003676//nucleic acid binding;GO:0003824//catalytic activity;GO:1901363//heterocyclic compound binding;GO:0005488//binding;GO:0043167//ion binding;GO:0003700//sequence-specific DNA binding transcription factor activity;GO:0097159//organic c…	GO:0065007//biological regulation;GO:0010556//regulation of macromolecule biosynthetic process;GO:1901360//organic cyclic compound metabolic process;GO:0008152//metabolic process;GO:0009605//response to external stimulus;GO:0043170//macromolecule metabolic process;GO:0019222//regulation of metabolic process;GO:0090304//nucleic acid metabolic process;GO:0009058//biosynthetic process;GO:0006725//ce…
Gh_D11G2207	0.17	0	0	0.18	0.42	0	0	0.59	0	0.16	0	0	0	0	0.21	0	0.17	0	1	0	0	1	3	0	0	3	0	1	0	0	0	0	1	0	1	0	Gh_D11G2207	Gh_D11G2207	Transcription factor PERIANTHIA [Source:UniProtKB/Swiss-Prot;Acc:Q9SX27]	Environmental Information Processing	Signal transduction	ko04075//Plant hormone signal transduction	GO:0005622//intracellular;GO:0044424//intracellular part;GO:0044464//cell part;GO:0043227//membrane-bounded organelle;GO:0043231//intracellular membrane-bounded organelle;GO:0005634//nucleus;GO:0043226//organelle;GO:0005623//cell;GO:0043229//intracellular organelle	GO:0043565//sequence-specific DNA binding;GO:0001071//nucleic acid binding transcription factor activity;GO:1901363//heterocyclic compound binding;GO:0097159//organic cyclic compound binding;GO:0003677//DNA binding;GO:0003700//sequence-specific DNA binding transcription factor activity;GO:0005488//binding;GO:0003676//nucleic acid binding	GO:0050794//regulation of cellular process;GO:0050789//regulation of biological process;GO:0008152//metabolic process;GO:1901360//organic cyclic compound metabolic process;GO:1901576//organic substance biosynthetic process;GO:0009909//regulation of flower development;GO:0009059//macromolecule biosynthetic process;GO:0043170//macromolecule metabolic process;GO:0097659//nucleic acid-templated trans…
Gh_D11G2225	1.05	2.14	1.48	3.08	2.52	2.2	3.85	3.12	4.02	0.98	1.35	0.86	1.11	1.07	0.23	2.7	1.27	1.57	23	48	29	63	66	46	90	58	80	22	24	18	28	20	4	57	27	31	Gh_D11G2225	Gh_D11G2225	Transcription factor TGA1 [Source:UniProtKB/Swiss-Prot;Acc:Q39237]	Environmental Information Processing	Signal transduction	ko04075//Plant hormone signal transduction	GO:0043229//intracellular organelle;GO:0005623//cell;GO:0043231//intracellular membrane-bounded organelle;GO:0044424//intracellular part;GO:0043226//organelle;GO:0005622//intracellular;GO:0043227//membrane-bounded organelle;GO:0044464//cell part;GO:0005634//nucleus	GO:0005488//binding;GO:1901363//heterocyclic compound binding;GO:0043565//sequence-specific DNA binding;GO:0003677//DNA binding;GO:0000975//regulatory region DNA binding;GO:0097159//organic cyclic compound binding;GO:0001067//regulatory region nucleic acid binding;GO:0001071//nucleic acid binding transcription factor activity;GO:0003676//nucleic acid binding;GO:0003700//sequence-specific DNA bind…	GO:0034645//cellular macromolecule biosynthetic process;GO:0009889//regulation of biosynthetic process;GO:0080090//regulation of primary metabolic process;GO:0006950//response to stress;GO:0006725//cellular aromatic compound metabolic process;GO:0009605//response to external stimulus;GO:0044249//cellular biosynthetic process;GO:0009058//biosynthetic process;GO:0016070//RNA metabolic process;GO:00…
Gh_D11G3337	13.9	10.71	12.82	10.13	12.06	13.45	12.67	16.11	12.98	13.83	11.15	13.85	12.86	14.3	12.2	10.81	12.93	11.16	330.91	262.72	274.43	226.01	344.46	307.42	323.18	326.71	282.15	339.41	217	318.27	355.82	292.61	227.17	249.19	300.24	240.95	Gh_D11G3337	Gh_D11G3337	Transcription factor TGA2 [Source:UniProtKB/Swiss-Prot;Acc:P43273]	Environmental Information Processing	Signal transduction	ko04075//Plant hormone signal transduction	GO:0044424//intracellular part;GO:0043231//intracellular membrane-bounded organelle;GO:0005623//cell;GO:0005634//nucleus;GO:0005622//intracellular;GO:0043226//organelle;GO:0044464//cell part;GO:0043229//intracellular organelle;GO:0005737//cytoplasm;GO:0043227//membrane-bounded organelle	GO:0003677//DNA binding;GO:0003700//sequence-specific DNA binding transcription factor activity;GO:0097159//organic cyclic compound binding;GO:0005488//binding;GO:0003676//nucleic acid binding;GO:0043565//sequence-specific DNA binding;GO:0001071//nucleic acid binding transcription factor activity;GO:1901363//heterocyclic compound binding	GO:0023052//signaling;GO:0098542//defense response to other organism;GO:0016070//RNA metabolic process;GO:0009987//cellular process;GO:1903508//positive regulation of nucleic acid-templated transcription;GO:0048522//positive regulation of cellular process;GO:0006725//cellular aromatic compound metabolic process;GO:0034654//nucleobase-containing compound biosynthetic process;GO:0009626//plant-type…
Gh_D12G0872	0.19	0.14	0.27	0.21	0.2	0.2	0.18	0.17	0.16	0.95	0.48	0.56	0	0.35	0.31	0.1	0.15	0.11	4	3	5	4	5	4	4	3	3	20	8	11	0	6.14	5	2	3	2	Gh_D12G0872	Gh_D12G0872	Transcription factor PERIANTHIA [Source:UniProtKB/Swiss-Prot;Acc:Q9SX27]	Environmental Information Processing	Signal transduction	ko04075//Plant hormone signal transduction	GO:0005622//intracellular;GO:0044424//intracellular part;GO:0044464//cell part;GO:0043227//membrane-bounded organelle;GO:0043231//intracellular membrane-bounded organelle;GO:0005634//nucleus;GO:0043226//organelle;GO:0005623//cell;GO:0043229//intracellular organelle	GO:0043565//sequence-specific DNA binding;GO:0001071//nucleic acid binding transcription factor activity;GO:1901363//heterocyclic compound binding;GO:0097159//organic cyclic compound binding;GO:0003677//DNA binding;GO:0003700//sequence-specific DNA binding transcription factor activity;GO:0005488//binding;GO:0003676//nucleic acid binding	GO:0050794//regulation of cellular process;GO:0050789//regulation of biological process;GO:0008152//metabolic process;GO:1901360//organic cyclic compound metabolic process;GO:1901576//organic substance biosynthetic process;GO:0009909//regulation of flower development;GO:0009059//macromolecule biosynthetic process;GO:0043170//macromolecule metabolic process;GO:0097659//nucleic acid-templated trans…
Gh_D12G1679	1.56	1.64	1.18	1.26	1.19	1.45	1.65	1.54	1.41	1.93	2.48	1.24	1.27	2.21	1.24	0.94	1.3	1.03	37	40.07	25	28	33.79	33	41.71	31	30.53	47	48	28.36	35	44.86	23	21.6	30	22	Gh_D12G1679	Gh_D12G1679	Transcription factor PERIANTHIA [Source:UniProtKB/Swiss-Prot;Acc:Q9SX27]	Environmental Information Processing	Signal transduction	ko04075//Plant hormone signal transduction	GO:0005622//intracellular;GO:0044424//intracellular part;GO:0044464//cell part;GO:0043227//membrane-bounded organelle;GO:0043231//intracellular membrane-bounded organelle;GO:0005634//nucleus;GO:0043226//organelle;GO:0005623//cell;GO:0043229//intracellular organelle	GO:0043565//sequence-specific DNA binding;GO:0001071//nucleic acid binding transcription factor activity;GO:1901363//heterocyclic compound binding;GO:0097159//organic cyclic compound binding;GO:0003677//DNA binding;GO:0003700//sequence-specific DNA binding transcription factor activity;GO:0005488//binding;GO:0003676//nucleic acid binding	GO:0050794//regulation of cellular process;GO:0050789//regulation of biological process;GO:0008152//metabolic process;GO:1901360//organic cyclic compound metabolic process;GO:1901576//organic substance biosynthetic process;GO:0009909//regulation of flower development;GO:0009059//macromolecule biosynthetic process;GO:0043170//macromolecule metabolic process;GO:0097659//nucleic acid-templated trans…
Gh_D13G0017	9.53	7.26	9.17	7.57	9.65	7.58	10.76	10.17	10.37	11.58	9.69	9.85	10.57	10.75	7.75	6.92	7.94	10.04	176.88	138.87	153.09	131.71	215	135	214.14	160.91	175.83	221.56	147	176.44	228	171.46	112.5	124.42	143.7	169	Gh_D13G0017	Gh_D13G0017	Transcription factor TGA6 [Source:UniProtKB/Swiss-Prot;Acc:Q39140]	Environmental Information Processing	Signal transduction	ko04075//Plant hormone signal transduction	GO:0005634//nucleus;GO:0005623//cell;GO:0005622//intracellular;GO:0044464//cell part;GO:0044424//intracellular part;GO:0043231//intracellular membrane-bounded organelle;GO:0043227//membrane-bounded organelle;GO:0043229//intracellular organelle;GO:0043226//organelle	GO:0001071//nucleic acid binding transcription factor activity;GO:0043565//sequence-specific DNA binding;GO:0003677//DNA binding;GO:0043169//cation binding;GO:0003676//nucleic acid binding;GO:0003824//catalytic activity;GO:1901363//heterocyclic compound binding;GO:0005488//binding;GO:0043167//ion binding;GO:0003700//sequence-specific DNA binding transcription factor activity;GO:0097159//organic c…	GO:0065007//biological regulation;GO:0010556//regulation of macromolecule biosynthetic process;GO:1901360//organic cyclic compound metabolic process;GO:0008152//metabolic process;GO:0009605//response to external stimulus;GO:0043170//macromolecule metabolic process;GO:0019222//regulation of metabolic process;GO:0090304//nucleic acid metabolic process;GO:0009058//biosynthetic process;GO:0006725//ce…
Gh_D13G0042	5.06	5.45	4.75	3.81	5.87	5.99	8.43	6.78	6.48	5.41	5.79	5.24	4.95	4.19	4.77	2.53	3.88	3.34	108.44	120.32	91.56	76.5	150.97	123.33	193.64	123.87	126.82	119.5	101.44	108.39	123.31	77.25	79.97	52.55	81.16	65.04	Gh_D13G0042	Gh_D13G0042	Transcription factor TGA6 [Source:UniProtKB/Swiss-Prot;Acc:Q39140]	Environmental Information Processing	Signal transduction	ko04075//Plant hormone signal transduction	GO:0005634//nucleus;GO:0005623//cell;GO:0005622//intracellular;GO:0044464//cell part;GO:0044424//intracellular part;GO:0043231//intracellular membrane-bounded organelle;GO:0043227//membrane-bounded organelle;GO:0043229//intracellular organelle;GO:0043226//organelle	GO:0001071//nucleic acid binding transcription factor activity;GO:0043565//sequence-specific DNA binding;GO:0003677//DNA binding;GO:0043169//cation binding;GO:0003676//nucleic acid binding;GO:0003824//catalytic activity;GO:1901363//heterocyclic compound binding;GO:0005488//binding;GO:0043167//ion binding;GO:0003700//sequence-specific DNA binding transcription factor activity;GO:0097159//organic c…	GO:0065007//biological regulation;GO:0010556//regulation of macromolecule biosynthetic process;GO:1901360//organic cyclic compound metabolic process;GO:0008152//metabolic process;GO:0009605//response to external stimulus;GO:0043170//macromolecule metabolic process;GO:0019222//regulation of metabolic process;GO:0090304//nucleic acid metabolic process;GO:0009058//biosynthetic process;GO:0006725//ce…
Gh_D13G0732	0	0	0	0	0	0	0	0	0	0	0.05	0	0	0	0	0	0	0	0	0	0	0	0	0	0	0	0	0	1	0	0	0	0	0	0	0	Gh_D13G0732	Gh_D13G0732	Transcription factor PERIANTHIA [Source:UniProtKB/Swiss-Prot;Acc:Q9SX27]	Environmental Information Processing	Signal transduction	ko04075//Plant hormone signal transduction	GO:0005622//intracellular;GO:0044424//intracellular part;GO:0044464//cell part;GO:0043227//membrane-bounded organelle;GO:0043231//intracellular membrane-bounded organelle;GO:0005634//nucleus;GO:0043226//organelle;GO:0005623//cell;GO:0043229//intracellular organelle	GO:0043565//sequence-specific DNA binding;GO:0001071//nucleic acid binding transcription factor activity;GO:1901363//heterocyclic compound binding;GO:0097159//organic cyclic compound binding;GO:0003677//DNA binding;GO:0003700//sequence-specific DNA binding transcription factor activity;GO:0005488//binding;GO:0003676//nucleic acid binding	GO:0050794//regulation of cellular process;GO:0050789//regulation of biological process;GO:0008152//metabolic process;GO:1901360//organic cyclic compound metabolic process;GO:1901576//organic substance biosynthetic process;GO:0009909//regulation of flower development;GO:0009059//macromolecule biosynthetic process;GO:0043170//macromolecule metabolic process;GO:0097659//nucleic acid-templated trans…
Gh_D13G1438	0.65	1.58	2.3	1.27	0.81	0.68	0.2	0.38	1.07	0.32	1.86	0.34	0.47	0.51	0.14	1.12	0.33	0	6	15	19	11	9	6	2	3	9	3	14	3	5	4	1	10	3	0	Gh_D13G1438	Gh_D13G1438	Transcription factor TGA2 [Source:UniProtKB/Swiss-Prot;Acc:P43273]	Environmental Information Processing	Signal transduction	ko04075//Plant hormone signal transduction	GO:0044424//intracellular part;GO:0043231//intracellular membrane-bounded organelle;GO:0005623//cell;GO:0005634//nucleus;GO:0005622//intracellular;GO:0043226//organelle;GO:0044464//cell part;GO:0043229//intracellular organelle;GO:0005737//cytoplasm;GO:0043227//membrane-bounded organelle	GO:0003677//DNA binding;GO:0003700//sequence-specific DNA binding transcription factor activity;GO:0097159//organic cyclic compound binding;GO:0005488//binding;GO:0003676//nucleic acid binding;GO:0043565//sequence-specific DNA binding;GO:0001071//nucleic acid binding transcription factor activity;GO:1901363//heterocyclic compound binding	GO:0023052//signaling;GO:0098542//defense response to other organism;GO:0016070//RNA metabolic process;GO:0009987//cellular process;GO:1903508//positive regulation of nucleic acid-templated transcription;GO:0048522//positive regulation of cellular process;GO:0006725//cellular aromatic compound metabolic process;GO:0034654//nucleobase-containing compound biosynthetic process;GO:0009626//plant-type…
Gh_Sca005862G02	0.2	0.68	0.11	0.11	0.67	0.21	0.09	0	0.22	0.59	0.37	0.21	0.78	0.59	0.39	0.83	0.1	0.11	2	7	1	1	8	2	1	0	2	6	3	2	9	5	3	8	1	1	Gh_Sca005862G02	Gh_Sca005862G02	Transcription factor PERIANTHIA [Source:UniProtKB/Swiss-Prot;Acc:Q9SX27]	Environmental Information Processing	Signal transduction	ko04075//Plant hormone signal transduction	GO:0005622//intracellular;GO:0044424//intracellular part;GO:0044464//cell part;GO:0043227//membrane-bounded organelle;GO:0043231//intracellular membrane-bounded organelle;GO:0005634//nucleus;GO:0043226//organelle;GO:0005623//cell;GO:0043229//intracellular organelle	GO:0043565//sequence-specific DNA binding;GO:0001071//nucleic acid binding transcription factor activity;GO:1901363//heterocyclic compound binding;GO:0097159//organic cyclic compound binding;GO:0003677//DNA binding;GO:0003700//sequence-specific DNA binding transcription factor activity;GO:0005488//binding;GO:0003676//nucleic acid binding	GO:0050794//regulation of cellular process;GO:0050789//regulation of biological process;GO:0008152//metabolic process;GO:1901360//organic cyclic compound metabolic process;GO:1901576//organic substance biosynthetic process;GO:0009909//regulation of flower development;GO:0009059//macromolecule biosynthetic process;GO:0043170//macromolecule metabolic process;GO:0097659//nucleic acid-templated trans…
Gh_Sca099210G01	0	0	0	0	0	0	0	0	0	0	0	0	0	0	0	0	0.49	0	0	0	0	0	0	0	0	0	0	0	0	0	0	0	0	0	1.85	0	Gh_Sca099210G01	Gh_Sca099210G01	Transcription factor TGA4 [Source:UniProtKB/Swiss-Prot;Acc:Q39162]	Environmental Information Processing	Signal transduction	ko04075//Plant hormone signal transduction	GO:0043227//membrane-bounded organelle;GO:0043231//intracellular membrane-bounded organelle;GO:0044424//intracellular part;GO:0043226//organelle;GO:0005623//cell;GO:0044464//cell part;GO:0005634//nucleus;GO:0005622//intracellular;GO:0043229//intracellular organelle	GO:0003677//DNA binding;GO:0001071//nucleic acid binding transcription factor activity;GO:0043565//sequence-specific DNA binding;GO:0097159//organic cyclic compound binding;GO:1901363//heterocyclic compound binding;GO:0005488//binding;GO:0003700//sequence-specific DNA binding transcription factor activity;GO:0003676//nucleic acid binding	GO:0046483//heterocycle metabolic process;GO:0009889//regulation of biosynthetic process;GO:0006351//transcription, DNA-templated;GO:0034641//cellular nitrogen compound metabolic process;GO:0016070//RNA metabolic process;GO:0044238//primary metabolic process;GO:0009987//cellular process;GO:1901576//organic substance biosynthetic process;GO:1903506//regulation of nucleic acid-templated transcripti…
Gh_Sca177042G01	0	0	0	0	0	0	0	0	0	0	0	0	0	0	0	0	0	0	0	0	0	0	0	0	0	0	0	0	0	0	0	0	0	0	0	0	Gh_Sca177042G01	Gh_Sca177042G01	Transcription factor TGA4 [Source:UniProtKB/Swiss-Prot;Acc:Q39162]	Environmental Information Processing	Signal transduction	ko04075//Plant hormone signal transduction	GO:0043227//membrane-bounded organelle;GO:0043231//intracellular membrane-bounded organelle;GO:0044424//intracellular part;GO:0043226//organelle;GO:0005623//cell;GO:0044464//cell part;GO:0005634//nucleus;GO:0005622//intracellular;GO:0043229//intracellular organelle	GO:0003677//DNA binding;GO:0001071//nucleic acid binding transcription factor activity;GO:0043565//sequence-specific DNA binding;GO:0097159//organic cyclic compound binding;GO:1901363//heterocyclic compound binding;GO:0005488//binding;GO:0003700//sequence-specific DNA binding transcription factor activity;GO:0003676//nucleic acid binding	GO:0046483//heterocycle metabolic process;GO:0009889//regulation of biosynthetic process;GO:0006351//transcription, DNA-templated;GO:0034641//cellular nitrogen compound metabolic process;GO:0016070//RNA metabolic process;GO:0044238//primary metabolic process;GO:0009987//cellular process;GO:1901576//organic substance biosynthetic process;GO:1903506//regulation of nucleic acid-templated transcripti…
XLOC_029979	4.08	4.13	4.25	8.79	6.84	8.02	12.1	13.53	11.34	8.66	7.36	4.74	10.07	9.44	6.36	10.44	12.79	10.23	63.62	64.75	71.03	137.81	120.18	125.79	186.15	165.54	142.94	112.72	85.41	64.06	160.98	99.95	67.02	166.68	177.33	134.59	TGA1	XLOC_029979	Transcription factor TGA1 [Source:UniProtKB/Swiss-Prot;Acc:Q39237]	Environmental Information Processing	Signal transduction	ko04075//Plant hormone signal transduction	GO:0043229//intracellular organelle;GO:0005623//cell;GO:0043231//intracellular membrane-bounded organelle;GO:0044424//intracellular part;GO:0043226//organelle;GO:0005622//intracellular;GO:0043227//membrane-bounded organelle;GO:0044464//cell part;GO:0005634//nucleus	GO:0005488//binding;GO:1901363//heterocyclic compound binding;GO:0043565//sequence-specific DNA binding;GO:0003677//DNA binding;GO:0000975//regulatory region DNA binding;GO:0097159//organic cyclic compound binding;GO:0001067//regulatory region nucleic acid binding;GO:0001071//nucleic acid binding transcription factor activity;GO:0003676//nucleic acid binding;GO:0003700//sequence-specific DNA bind…	GO:0034645//cellular macromolecule biosynthetic process;GO:0009889//regulation of biosynthetic process;GO:0080090//regulation of primary metabolic process;GO:0006950//response to stress;GO:0006725//cellular aromatic compound metabolic process;GO:0009605//response to external stimulus;GO:0044249//cellular biosynthetic process;GO:0009058//biosynthetic process;GO:0016070//RNA metabolic process;GO:00…
XLOC_065857	2.43	1.96	2.1	4.28	1.84	3.36	2.82	3.82	3.82	1.08	2.04	1.41	3.51	2.21	0.97	4.36	3.18	3.12	62.38	58.25	56.97	120.19	65.82	96.21	86.85	94.46	104.06	29.28	44.59	40.94	115.02	48.05	22.98	122.32	79.67	80.41	TGA1	XLOC_065857	Transcription factor TGA1 [Source:UniProtKB/Swiss-Prot;Acc:Q39237]	Environmental Information Processing	Signal transduction	ko04075//Plant hormone signal transduction	GO:0043229//intracellular organelle;GO:0005623//cell;GO:0043231//intracellular membrane-bounded organelle;GO:0044424//intracellular part;GO:0043226//organelle;GO:0005622//intracellular;GO:0043227//membrane-bounded organelle;GO:0044464//cell part;GO:0005634//nucleus	GO:0005488//binding;GO:1901363//heterocyclic compound binding;GO:0043565//sequence-specific DNA binding;GO:0003677//DNA binding;GO:0000975//regulatory region DNA binding;GO:0097159//organic cyclic compound binding;GO:0001067//regulatory region nucleic acid binding;GO:0001071//nucleic acid binding transcription factor activity;GO:0003676//nucleic acid binding;GO:0003700//sequence-specific DNA bind…	GO:0034645//cellular macromolecule biosynthetic process;GO:0009889//regulation of biosynthetic process;GO:0080090//regulation of primary metabolic process;GO:0006950//response to stress;GO:0006725//cellular aromatic compound metabolic process;GO:0009605//response to external stimulus;GO:0044249//cellular biosynthetic process;GO:0009058//biosynthetic process;GO:0016070//RNA metabolic process;GO:00…
Gh_A01G1472	3.59	4.18	3.13	3.5	4.42	5.87	8.05	9.12	10.3	2.76	1.93	1.84	3.02	2.24	2.82	2.33	2.45	2.96	54.66	65.6	42.77	50	80.67	85.73	131.28	118.32	143.23	43.23	24	27	53.36	29.29	33.55	34.35	36.3	40.81	Gh_A01G1472	Gh_A01G1472	Basic-leucine zipper (bZIP) transcription factor family protein [Source:TAIR;Acc:AT5G44080]	Environmental Information Processing	Signal transduction	ko04075//Plant hormone signal transduction	-	GO:0005488//binding;GO:0003677//DNA binding;GO:0003700//sequence-specific DNA binding transcription factor activity;GO:0001071//nucleic acid binding transcription factor activity;GO:0003676//nucleic acid binding;GO:1901363//heterocyclic compound binding;GO:0043565//sequence-specific DNA binding;GO:0097159//organic cyclic compound binding	GO:0007154//cell communication;GO:0060255//regulation of macromolecule metabolic process;GO:0035967//cellular response to topologically incorrect protein;GO:0044700//single organism signaling;GO:0010468//regulation of gene expression;GO:0050789//regulation of biological process;GO:0070887//cellular response to chemical stimulus;GO:0019219//regulation of nucleobase-containing compound metabolic pr…
Gh_A01G1768	0.35	0.29	0.39	0.16	0.33	0.26	0.05	0.47	0.44	0.34	0.43	0.36	0.13	0	0.32	0	0.46	0.22	7	6	7	3	7.81	5	1.14	8	8	7	7	7	3	0	5	0	9	4	Gh_A01G1768	Gh_A01G1768	Protein ABSCISIC ACID-INSENSITIVE 5 [Source:UniProtKB/Swiss-Prot;Acc:Q9SJN0]	Environmental Information Processing	Signal transduction	ko04075//Plant hormone signal transduction	GO:0043231//intracellular membrane-bounded organelle;GO:0005623//cell;GO:0043227//membrane-bounded organelle;GO:0005622//intracellular;GO:0005634//nucleus;GO:0044464//cell part;GO:0043226//organelle;GO:0043229//intracellular organelle;GO:0044424//intracellular part	GO:0003700//sequence-specific DNA binding transcription factor activity;GO:0001071//nucleic acid binding transcription factor activity;GO:1901363//heterocyclic compound binding;GO:0003676//nucleic acid binding;GO:0003677//DNA binding;GO:0043565//sequence-specific DNA binding;GO:0005488//binding;GO:0097159//organic cyclic compound binding	GO:0071229//cellular response to acid chemical;GO:0071396//cellular response to lipid;GO:0034654//nucleobase-containing compound biosynthetic process;GO:0048608//reproductive structure development;GO:0018130//heterocycle biosynthetic process;GO:0034645//cellular macromolecule biosynthetic process;GO:0043170//macromolecule metabolic process;GO:0071704//organic substance metabolic process;GO:001922…
Gh_A02G0658	5.4	4.93	5.61	3.08	4.74	6.3	4.65	5.73	4.06	6.91	6.35	5.57	4.66	7.1	6.57	4.01	3.58	3.67	83.83	78.92	78.38	44.8	88.27	93.87	77.37	75.81	57.53	110.69	80.61	83.43	84.09	94.84	79.82	60.25	54.27	51.73	Gh_A02G0658	Gh_A02G0658	Basic-leucine zipper (bZIP) transcription factor family protein [Source:TAIR;Acc:AT5G44080]	Environmental Information Processing	Signal transduction	ko04075//Plant hormone signal transduction	-	GO:0005488//binding;GO:0003677//DNA binding;GO:0003700//sequence-specific DNA binding transcription factor activity;GO:0001071//nucleic acid binding transcription factor activity;GO:0003676//nucleic acid binding;GO:1901363//heterocyclic compound binding;GO:0043565//sequence-specific DNA binding;GO:0097159//organic cyclic compound binding	GO:0007154//cell communication;GO:0060255//regulation of macromolecule metabolic process;GO:0035967//cellular response to topologically incorrect protein;GO:0044700//single organism signaling;GO:0010468//regulation of gene expression;GO:0050789//regulation of biological process;GO:0070887//cellular response to chemical stimulus;GO:0019219//regulation of nucleobase-containing compound metabolic pr…
Gh_A03G1664	34.95	26.7	27.14	28.08	30.71	27.31	32.35	32.88	33.66	27.71	25.07	29.24	23.17	27.59	27.62	18.44	24.03	16.55	699.23	550.35	488.02	526.56	737.14	524.35	693.47	560.27	614.92	571.47	409.85	564.56	538.52	474.44	432.09	356.97	468.73	300.27	Gh_A03G1664	Gh_A03G1664	ABSCISIC ACID-INSENSITIVE 5-like protein 6 [Source:UniProtKB/Swiss-Prot;Acc:Q9M7Q3]	Environmental Information Processing	Signal transduction	ko04075//Plant hormone signal transduction	GO:0005623//cell;GO:0043227//membrane-bounded organelle;GO:0005634//nucleus;GO:0044464//cell part;GO:0044424//intracellular part;GO:0043229//intracellular organelle;GO:0005622//intracellular;GO:0043226//organelle;GO:0043231//intracellular membrane-bounded organelle	GO:0005488//binding;GO:0043565//sequence-specific DNA binding;GO:0001071//nucleic acid binding transcription factor activity;GO:0003676//nucleic acid binding;GO:0003677//DNA binding;GO:0097159//organic cyclic compound binding;GO:1901363//heterocyclic compound binding;GO:0003700//sequence-specific DNA binding transcription factor activity	GO:0060255//regulation of macromolecule metabolic process;GO:0010468//regulation of gene expression;GO:0051252//regulation of RNA metabolic process;GO:0009628//response to abiotic stimulus;GO:0006725//cellular aromatic compound metabolic process;GO:0050789//regulation of biological process;GO:0044260//cellular macromolecule metabolic process;GO:1901360//organic cyclic compound metabolic process;G…
Gh_A03G1863	5.73	3.65	3.82	4.77	5.4	5.07	4.96	4.64	5.68	5.09	4.39	3.78	5.19	6.26	7.05	4.75	3.85	4.79	88.46	58	53	69	100	75	82	61	80	81	55.4	56.3	93	83	85	71	58	67	Gh_A03G1863	Gh_A03G1863	Basic-leucine zipper (bZIP) transcription factor family protein [Source:TAIR;Acc:AT5G44080]	Environmental Information Processing	Signal transduction	ko04075//Plant hormone signal transduction	-	GO:0005488//binding;GO:0003677//DNA binding;GO:0003700//sequence-specific DNA binding transcription factor activity;GO:0001071//nucleic acid binding transcription factor activity;GO:0003676//nucleic acid binding;GO:1901363//heterocyclic compound binding;GO:0043565//sequence-specific DNA binding;GO:0097159//organic cyclic compound binding	GO:0007154//cell communication;GO:0060255//regulation of macromolecule metabolic process;GO:0035967//cellular response to topologically incorrect protein;GO:0044700//single organism signaling;GO:0010468//regulation of gene expression;GO:0050789//regulation of biological process;GO:0070887//cellular response to chemical stimulus;GO:0019219//regulation of nucleobase-containing compound metabolic pr…
Gh_A03G2095	0.43	0.52	0.84	0.75	0.36	1.01	0.8	1.14	1	0.42	0.59	0.5	0.74	0.91	0.41	0.39	0.44	0.42	8	10	14	13	8	18	16	18	17	8	9.01	9	16	14.59	6	7	8	7	Gh_A03G2095	Gh_A03G2095	ABSCISIC ACID-INSENSITIVE 5-like protein 5 [Source:UniProtKB/Swiss-Prot;Acc:Q9M7Q4]	Environmental Information Processing	Signal transduction	ko04075//Plant hormone signal transduction	GO:0005623//cell;GO:0043229//intracellular organelle;GO:0043226//organelle;GO:0043227//membrane-bounded organelle;GO:0043231//intracellular membrane-bounded organelle;GO:0044464//cell part;GO:0005634//nucleus;GO:0005622//intracellular;GO:0044424//intracellular part	GO:0003677//DNA binding;GO:0003676//nucleic acid binding;GO:0043565//sequence-specific DNA binding;GO:1901363//heterocyclic compound binding;GO:0097159//organic cyclic compound binding;GO:0001071//nucleic acid binding transcription factor activity;GO:0005488//binding;GO:0003700//sequence-specific DNA binding transcription factor activity	GO:0050789//regulation of biological process;GO:0034654//nucleobase-containing compound biosynthetic process;GO:0009725//response to hormone;GO:0032870//cellular response to hormone stimulus;GO:0010556//regulation of macromolecule biosynthetic process;GO:0080090//regulation of primary metabolic process;GO:0051716//cellular response to stimulus;GO:0006355//regulation of transcription, DNA-template…
Gh_A05G1751	28.7	32.42	26.16	34.56	29.9	34.09	33.65	32.73	39.93	18.01	24.12	20.63	22.12	18.46	17.89	30.04	24.72	24.81	668.56	778.01	547.82	754.7	835.84	762.16	840.08	649.53	849.45	432.35	459.16	463.74	598.68	369.71	325.97	677.29	561.57	524.2	Gh_A05G1751	Gh_A05G1751	ABSCISIC ACID-INSENSITIVE 5-like protein 5 [Source:UniProtKB/Swiss-Prot;Acc:Q9M7Q4]	Environmental Information Processing	Signal transduction	ko04075//Plant hormone signal transduction	GO:0005623//cell;GO:0043229//intracellular organelle;GO:0043226//organelle;GO:0043227//membrane-bounded organelle;GO:0043231//intracellular membrane-bounded organelle;GO:0044464//cell part;GO:0005634//nucleus;GO:0005622//intracellular;GO:0044424//intracellular part	GO:0003677//DNA binding;GO:0003676//nucleic acid binding;GO:0043565//sequence-specific DNA binding;GO:1901363//heterocyclic compound binding;GO:0097159//organic cyclic compound binding;GO:0001071//nucleic acid binding transcription factor activity;GO:0005488//binding;GO:0003700//sequence-specific DNA binding transcription factor activity	GO:0050789//regulation of biological process;GO:0034654//nucleobase-containing compound biosynthetic process;GO:0009725//response to hormone;GO:0032870//cellular response to hormone stimulus;GO:0010556//regulation of macromolecule biosynthetic process;GO:0080090//regulation of primary metabolic process;GO:0051716//cellular response to stimulus;GO:0006355//regulation of transcription, DNA-template…
Gh_A05G2234	0	0	0	0.05	0.08	0	0.22	0	0.05	0	0	0	0.04	0	0	0.25	0.15	0	0	0	0	1	2	0	5	0	1	0	0	0	1	0	0	5	3	0	Gh_A05G2234	Gh_A05G2234	ABSCISIC ACID-INSENSITIVE 5-like protein 5 [Source:UniProtKB/Swiss-Prot;Acc:Q9M7Q4]	Environmental Information Processing	Signal transduction	ko04075//Plant hormone signal transduction	GO:0005623//cell;GO:0043229//intracellular organelle;GO:0043226//organelle;GO:0043227//membrane-bounded organelle;GO:0043231//intracellular membrane-bounded organelle;GO:0044464//cell part;GO:0005634//nucleus;GO:0005622//intracellular;GO:0044424//intracellular part	GO:0003677//DNA binding;GO:0003676//nucleic acid binding;GO:0043565//sequence-specific DNA binding;GO:1901363//heterocyclic compound binding;GO:0097159//organic cyclic compound binding;GO:0001071//nucleic acid binding transcription factor activity;GO:0005488//binding;GO:0003700//sequence-specific DNA binding transcription factor activity	GO:0050789//regulation of biological process;GO:0034654//nucleobase-containing compound biosynthetic process;GO:0009725//response to hormone;GO:0032870//cellular response to hormone stimulus;GO:0010556//regulation of macromolecule biosynthetic process;GO:0080090//regulation of primary metabolic process;GO:0051716//cellular response to stimulus;GO:0006355//regulation of transcription, DNA-template…
Gh_A05G2447	4.09	4.59	3.75	4.15	4.35	3.86	2.88	2.45	4.91	5.45	3.88	4.3	3.2	3.1	5.82	2.54	2.12	2.96	52.42	60.5	43.13	49.81	66.81	47.38	39.54	26.74	57.4	71.92	40.64	53.08	47.58	34.07	58.25	31.54	26.44	34.32	Gh_A05G2447	Gh_A05G2447	ABSCISIC ACID-INSENSITIVE 5-like protein 2 [Source:UniProtKB/Swiss-Prot;Acc:Q9LES3]	Environmental Information Processing	Signal transduction	ko04075//Plant hormone signal transduction	GO:0044424//intracellular part;GO:0043227//membrane-bounded organelle;GO:0044464//cell part;GO:0005622//intracellular;GO:0005634//nucleus;GO:0043226//organelle;GO:0043229//intracellular organelle;GO:0043231//intracellular membrane-bounded organelle;GO:0005623//cell	GO:0043565//sequence-specific DNA binding;GO:0001071//nucleic acid binding transcription factor activity;GO:0097159//organic cyclic compound binding;GO:0003677//DNA binding;GO:0003700//sequence-specific DNA binding transcription factor activity;GO:0003676//nucleic acid binding;GO:0005488//binding;GO:1901363//heterocyclic compound binding	GO:0071229//cellular response to acid chemical;GO:0010033//response to organic substance;GO:0008152//metabolic process;GO:0065007//biological regulation;GO:0044699//single-organism process;GO:0009738//abscisic acid-activated signaling pathway;GO:0009755//hormone-mediated signaling pathway;GO:0019219//regulation of nucleobase-containing compound metabolic process;GO:0009737//response to abscisic a…
Gh_A05G2448	11.66	10.42	11.96	11.27	13.99	12.27	10.65	9.98	10.84	17.81	12.49	13.7	10.08	14.47	12.12	10.67	14.55	13.98	193	177.68	178	174.93	278	195	189	140.77	164	304	169	219	194	205.9	157	171	235	210	Gh_A05G2448	Gh_A05G2448	ABSCISIC ACID-INSENSITIVE 5-like protein 2 [Source:UniProtKB/Swiss-Prot;Acc:Q9LES3]	Environmental Information Processing	Signal transduction	ko04075//Plant hormone signal transduction	GO:0044424//intracellular part;GO:0043227//membrane-bounded organelle;GO:0044464//cell part;GO:0005622//intracellular;GO:0005634//nucleus;GO:0043226//organelle;GO:0043229//intracellular organelle;GO:0043231//intracellular membrane-bounded organelle;GO:0005623//cell	GO:0043565//sequence-specific DNA binding;GO:0001071//nucleic acid binding transcription factor activity;GO:0097159//organic cyclic compound binding;GO:0003677//DNA binding;GO:0003700//sequence-specific DNA binding transcription factor activity;GO:0003676//nucleic acid binding;GO:0005488//binding;GO:1901363//heterocyclic compound binding	GO:0071229//cellular response to acid chemical;GO:0010033//response to organic substance;GO:0008152//metabolic process;GO:0065007//biological regulation;GO:0044699//single-organism process;GO:0009738//abscisic acid-activated signaling pathway;GO:0009755//hormone-mediated signaling pathway;GO:0019219//regulation of nucleobase-containing compound metabolic process;GO:0009737//response to abscisic a…
Gh_A06G0328	0.06	0	0	0.13	0	0	0	0	0.13	0.12	0	0.13	0.16	0	0.1	0.29	0.06	0.4	1	0	0	2	0	0	0	0	2	2	0	2	3	0	1.34	4.65	1	6	Gh_A06G0328	Gh_A06G0328	ABSCISIC ACID-INSENSITIVE 5-like protein 2 [Source:UniProtKB/Swiss-Prot;Acc:Q9LES3]	Environmental Information Processing	Signal transduction	ko04075//Plant hormone signal transduction	GO:0044424//intracellular part;GO:0043227//membrane-bounded organelle;GO:0044464//cell part;GO:0005622//intracellular;GO:0005634//nucleus;GO:0043226//organelle;GO:0043229//intracellular organelle;GO:0043231//intracellular membrane-bounded organelle;GO:0005623//cell	GO:0043565//sequence-specific DNA binding;GO:0001071//nucleic acid binding transcription factor activity;GO:0097159//organic cyclic compound binding;GO:0003677//DNA binding;GO:0003700//sequence-specific DNA binding transcription factor activity;GO:0003676//nucleic acid binding;GO:0005488//binding;GO:1901363//heterocyclic compound binding	GO:0071229//cellular response to acid chemical;GO:0010033//response to organic substance;GO:0008152//metabolic process;GO:0065007//biological regulation;GO:0044699//single-organism process;GO:0009738//abscisic acid-activated signaling pathway;GO:0009755//hormone-mediated signaling pathway;GO:0019219//regulation of nucleobase-containing compound metabolic process;GO:0009737//response to abscisic a…
Gh_A09G0901	0	0	0	0.16	0.17	0	0	0	0	0.05	0	0.05	0.04	0	0.06	0	0.05	0.11	0	0	0	3	4	0	0	0	0	1	0	1	1	0	1	0	1	2	Gh_A09G0901	Gh_A09G0901	ABSCISIC ACID-INSENSITIVE 5-like protein 1 [Source:UniProtKB/Swiss-Prot;Acc:Q8RYD6]	Environmental Information Processing	Signal transduction	ko04075//Plant hormone signal transduction	GO:0005622//intracellular;GO:0043229//intracellular organelle;GO:0044424//intracellular part;GO:0043226//organelle;GO:0043231//intracellular membrane-bounded organelle;GO:0005634//nucleus;GO:0044464//cell part;GO:0043227//membrane-bounded organelle;GO:0005623//cell	GO:0003700//sequence-specific DNA binding transcription factor activity;GO:0005515//protein binding;GO:0001071//nucleic acid binding transcription factor activity;GO:0097159//organic cyclic compound binding;GO:0043565//sequence-specific DNA binding;GO:0033613//activating transcription factor binding;GO:0008134//transcription factor binding;GO:0003676//nucleic acid binding;GO:0003677//DNA binding;…	GO:0009755//hormone-mediated signaling pathway;GO:0010467//gene expression;GO:0034641//cellular nitrogen compound metabolic process;GO:0044700//single organism signaling;GO:0010557//positive regulation of macromolecule biosynthetic process;GO:0097659//nucleic acid-templated transcription;GO:0006355//regulation of transcription, DNA-templated;GO:0071229//cellular response to acid chemical;GO:00098…
Gh_A12G0212	24.93	25.65	21.77	26.82	23.91	25.01	28.06	31.92	32.64	20.03	17.53	20.41	23.12	19.42	22.66	20.4	21.95	21.99	557.78	591.23	437.65	562.41	641.94	536.98	672.77	608.35	666.76	461.75	320.48	440.66	600.78	373.5	396.37	441.67	478.79	446.17	Gh_A12G0212	Gh_A12G0212	ABSCISIC ACID-INSENSITIVE 5-like protein 6 [Source:UniProtKB/Swiss-Prot;Acc:Q9M7Q3]	Environmental Information Processing	Signal transduction	ko04075//Plant hormone signal transduction	GO:0005623//cell;GO:0043227//membrane-bounded organelle;GO:0005634//nucleus;GO:0044464//cell part;GO:0044424//intracellular part;GO:0043229//intracellular organelle;GO:0005622//intracellular;GO:0043226//organelle;GO:0043231//intracellular membrane-bounded organelle	GO:0005488//binding;GO:0043565//sequence-specific DNA binding;GO:0001071//nucleic acid binding transcription factor activity;GO:0003676//nucleic acid binding;GO:0003677//DNA binding;GO:0097159//organic cyclic compound binding;GO:1901363//heterocyclic compound binding;GO:0003700//sequence-specific DNA binding transcription factor activity	GO:0060255//regulation of macromolecule metabolic process;GO:0010468//regulation of gene expression;GO:0051252//regulation of RNA metabolic process;GO:0009628//response to abiotic stimulus;GO:0006725//cellular aromatic compound metabolic process;GO:0050789//regulation of biological process;GO:0044260//cellular macromolecule metabolic process;GO:1901360//organic cyclic compound metabolic process;G…
Gh_A13G0355	43.65	43.04	32.58	38.51	44.15	44.41	43.49	48.15	47.38	28.74	31.28	29.41	30.15	23.96	23.52	28.04	34.68	29.71	913.52	928.01	613	755.55	1109	892	975.53	858.54	905.57	620	535	594	733.08	431	385	568	708	564	Gh_A13G0355	Gh_A13G0355	ABSCISIC ACID-INSENSITIVE 5-like protein 6 [Source:UniProtKB/Swiss-Prot;Acc:Q9M7Q3]	Environmental Information Processing	Signal transduction	ko04075//Plant hormone signal transduction	GO:0005623//cell;GO:0043227//membrane-bounded organelle;GO:0005634//nucleus;GO:0044464//cell part;GO:0044424//intracellular part;GO:0043229//intracellular organelle;GO:0005622//intracellular;GO:0043226//organelle;GO:0043231//intracellular membrane-bounded organelle	GO:0005488//binding;GO:0043565//sequence-specific DNA binding;GO:0001071//nucleic acid binding transcription factor activity;GO:0003676//nucleic acid binding;GO:0003677//DNA binding;GO:0097159//organic cyclic compound binding;GO:1901363//heterocyclic compound binding;GO:0003700//sequence-specific DNA binding transcription factor activity	GO:0060255//regulation of macromolecule metabolic process;GO:0010468//regulation of gene expression;GO:0051252//regulation of RNA metabolic process;GO:0009628//response to abiotic stimulus;GO:0006725//cellular aromatic compound metabolic process;GO:0050789//regulation of biological process;GO:0044260//cellular macromolecule metabolic process;GO:1901360//organic cyclic compound metabolic process;G…
Gh_A13G2006	6.48	11.23	12.12	13.14	8.29	8.38	2.07	1.2	3.75	0.87	3.03	0.92	1.8	0.88	1.78	8.83	1.56	0.98	102.33	182.73	172.03	194.43	157	127	35	16.12	54	14.13	39.14	14	33	12	22	135	24	14	Gh_A13G2006	Gh_A13G2006	ABSCISIC ACID-INSENSITIVE 5-like protein 3 [Source:UniProtKB/Swiss-Prot;Acc:Q9C5Q2]	Environmental Information Processing	Signal transduction	ko04075//Plant hormone signal transduction	GO:0044464//cell part;GO:0043229//intracellular organelle;GO:0043231//intracellular membrane-bounded organelle;GO:0044424//intracellular part;GO:0043227//membrane-bounded organelle;GO:0043226//organelle;GO:0005634//nucleus;GO:0005623//cell;GO:0005622//intracellular	GO:0043565//sequence-specific DNA binding;GO:0001071//nucleic acid binding transcription factor activity;GO:1901363//heterocyclic compound binding;GO:0097159//organic cyclic compound binding;GO:0003677//DNA binding;GO:0003676//nucleic acid binding;GO:0005488//binding;GO:0003700//sequence-specific DNA binding transcription factor activity	GO:0006725//cellular aromatic compound metabolic process;GO:0097659//nucleic acid-templated transcription;GO:0051171//regulation of nitrogen compound metabolic process;GO:0050789//regulation of biological process;GO:0042221//response to chemical;GO:0032774//RNA biosynthetic process;GO:0009737//response to abscisic acid;GO:0032870//cellular response to hormone stimulus;GO:0090304//nucleic acid met…
Gh_D01G1708	7.17	9.47	4.85	9.19	8.61	10.77	16.61	18.91	21.52	3.34	3.97	3.28	5.18	5.46	2.21	4.23	5.57	4.24	97.34	132.4	59.23	117	140.33	140.27	241.72	218.68	266.77	46.77	44	43	81.64	63.71	23.45	55.65	73.7	52.19	Gh_D01G1708	Gh_D01G1708	Basic-leucine zipper (bZIP) transcription factor family protein [Source:TAIR;Acc:AT5G44080]	Environmental Information Processing	Signal transduction	ko04075//Plant hormone signal transduction	-	GO:0005488//binding;GO:0003677//DNA binding;GO:0003700//sequence-specific DNA binding transcription factor activity;GO:0001071//nucleic acid binding transcription factor activity;GO:0003676//nucleic acid binding;GO:1901363//heterocyclic compound binding;GO:0043565//sequence-specific DNA binding;GO:0097159//organic cyclic compound binding	GO:0007154//cell communication;GO:0060255//regulation of macromolecule metabolic process;GO:0035967//cellular response to topologically incorrect protein;GO:0044700//single organism signaling;GO:0010468//regulation of gene expression;GO:0050789//regulation of biological process;GO:0070887//cellular response to chemical stimulus;GO:0019219//regulation of nucleobase-containing compound metabolic pr…
Gh_D01G2011	0.92	1.07	0.87	0.88	0.89	0.67	0.34	0.92	0.86	0.62	0.62	0.48	0.24	0.75	0.41	0.28	0.19	0.3	20	24	17	18	23.19	14	7.86	17	17	14	11	10	6	14	7	6	4	6	Gh_D01G2011	Gh_D01G2011	Protein ABSCISIC ACID-INSENSITIVE 5 [Source:UniProtKB/Swiss-Prot;Acc:Q9SJN0]	Environmental Information Processing	Signal transduction	ko04075//Plant hormone signal transduction	GO:0043231//intracellular membrane-bounded organelle;GO:0005623//cell;GO:0043227//membrane-bounded organelle;GO:0005622//intracellular;GO:0005634//nucleus;GO:0044464//cell part;GO:0043226//organelle;GO:0043229//intracellular organelle;GO:0044424//intracellular part	GO:0003700//sequence-specific DNA binding transcription factor activity;GO:0001071//nucleic acid binding transcription factor activity;GO:1901363//heterocyclic compound binding;GO:0003676//nucleic acid binding;GO:0003677//DNA binding;GO:0043565//sequence-specific DNA binding;GO:0005488//binding;GO:0097159//organic cyclic compound binding	GO:0071229//cellular response to acid chemical;GO:0071396//cellular response to lipid;GO:0034654//nucleobase-containing compound biosynthetic process;GO:0048608//reproductive structure development;GO:0018130//heterocycle biosynthetic process;GO:0034645//cellular macromolecule biosynthetic process;GO:0043170//macromolecule metabolic process;GO:0071704//organic substance metabolic process;GO:001922…
Gh_D02G0701	5.03	6.01	5.2	4.62	5.3	5.78	6.77	6.74	5.88	8.33	6.1	10.45	5.7	7.43	7.18	4.84	4.8	4.21	78.17	96.08	72.62	67.2	98.73	86.13	112.63	89.19	83.47	133.31	77.39	156.57	102.91	99.16	87.18	72.75	72.73	59.27	Gh_D02G0701	Gh_D02G0701	Basic-leucine zipper (bZIP) transcription factor family protein [Source:TAIR;Acc:AT5G44080]	Environmental Information Processing	Signal transduction	ko04075//Plant hormone signal transduction	-	GO:0005488//binding;GO:0003677//DNA binding;GO:0003700//sequence-specific DNA binding transcription factor activity;GO:0001071//nucleic acid binding transcription factor activity;GO:0003676//nucleic acid binding;GO:1901363//heterocyclic compound binding;GO:0043565//sequence-specific DNA binding;GO:0097159//organic cyclic compound binding	GO:0007154//cell communication;GO:0060255//regulation of macromolecule metabolic process;GO:0035967//cellular response to topologically incorrect protein;GO:0044700//single organism signaling;GO:0010468//regulation of gene expression;GO:0050789//regulation of biological process;GO:0070887//cellular response to chemical stimulus;GO:0019219//regulation of nucleobase-containing compound metabolic pr…
Gh_D02G0909	1.3	1.26	1.29	0.72	0.72	1.21	1.04	0.91	0.9	0.94	0.59	0.75	0.37	0.64	0.43	0.3	0.54	0.37	27	27	24	14	18	24	23	16	17	20	9.99	15	9	11.41	7	6	11	7	Gh_D02G0909	Gh_D02G0909	ABSCISIC ACID-INSENSITIVE 5-like protein 5 [Source:UniProtKB/Swiss-Prot;Acc:Q9M7Q4]	Environmental Information Processing	Signal transduction	ko04075//Plant hormone signal transduction	GO:0005623//cell;GO:0043229//intracellular organelle;GO:0043226//organelle;GO:0043227//membrane-bounded organelle;GO:0043231//intracellular membrane-bounded organelle;GO:0044464//cell part;GO:0005634//nucleus;GO:0005622//intracellular;GO:0044424//intracellular part	GO:0003677//DNA binding;GO:0003676//nucleic acid binding;GO:0043565//sequence-specific DNA binding;GO:1901363//heterocyclic compound binding;GO:0097159//organic cyclic compound binding;GO:0001071//nucleic acid binding transcription factor activity;GO:0005488//binding;GO:0003700//sequence-specific DNA binding transcription factor activity	GO:0050789//regulation of biological process;GO:0034654//nucleobase-containing compound biosynthetic process;GO:0009725//response to hormone;GO:0032870//cellular response to hormone stimulus;GO:0010556//regulation of macromolecule biosynthetic process;GO:0080090//regulation of primary metabolic process;GO:0051716//cellular response to stimulus;GO:0006355//regulation of transcription, DNA-template…
Gh_D02G2079	74.9	57.68	56.45	52.36	64.06	58.97	66.18	69.53	69.43	63.34	49.47	59.78	53.98	57.62	59.44	39.49	53.07	36.17	1567.77	1243.65	1061.98	1027.44	1608.86	1184.65	1484.53	1239.73	1327.08	1366.53	846.15	1207.44	1312.48	1036.56	972.91	800.03	1083.27	686.73	Gh_D02G2079	Gh_D02G2079	ABSCISIC ACID-INSENSITIVE 5-like protein 6 [Source:UniProtKB/Swiss-Prot;Acc:Q9M7Q3]	Environmental Information Processing	Signal transduction	ko04075//Plant hormone signal transduction	GO:0005623//cell;GO:0043227//membrane-bounded organelle;GO:0005634//nucleus;GO:0044464//cell part;GO:0044424//intracellular part;GO:0043229//intracellular organelle;GO:0005622//intracellular;GO:0043226//organelle;GO:0043231//intracellular membrane-bounded organelle	GO:0005488//binding;GO:0043565//sequence-specific DNA binding;GO:0001071//nucleic acid binding transcription factor activity;GO:0003676//nucleic acid binding;GO:0003677//DNA binding;GO:0097159//organic cyclic compound binding;GO:1901363//heterocyclic compound binding;GO:0003700//sequence-specific DNA binding transcription factor activity	GO:0060255//regulation of macromolecule metabolic process;GO:0010468//regulation of gene expression;GO:0051252//regulation of RNA metabolic process;GO:0009628//response to abiotic stimulus;GO:0006725//cellular aromatic compound metabolic process;GO:0050789//regulation of biological process;GO:0044260//cellular macromolecule metabolic process;GO:1901360//organic cyclic compound metabolic process;G…
Gh_D02G2302	6.71	5.91	5.84	7.67	7.51	7.5	6.29	9.74	7.17	8.36	6.71	8.85	7.81	11.61	10.28	6.23	7.64	10.51	103.54	94	81	111	139	111	104	128	101	133	84.6	131.7	140	154	124	93	115	147	Gh_D02G2302	Gh_D02G2302	Basic-leucine zipper (bZIP) transcription factor family protein [Source:TAIR;Acc:AT5G44080]	Environmental Information Processing	Signal transduction	ko04075//Plant hormone signal transduction	-	GO:0005488//binding;GO:0003677//DNA binding;GO:0003700//sequence-specific DNA binding transcription factor activity;GO:0001071//nucleic acid binding transcription factor activity;GO:0003676//nucleic acid binding;GO:1901363//heterocyclic compound binding;GO:0043565//sequence-specific DNA binding;GO:0097159//organic cyclic compound binding	GO:0007154//cell communication;GO:0060255//regulation of macromolecule metabolic process;GO:0035967//cellular response to topologically incorrect protein;GO:0044700//single organism signaling;GO:0010468//regulation of gene expression;GO:0050789//regulation of biological process;GO:0070887//cellular response to chemical stimulus;GO:0019219//regulation of nucleobase-containing compound metabolic pr…
Gh_D05G1946	15.61	18.51	21.22	21.48	14.62	17.21	17.27	17.83	18.95	13.63	13.05	12.87	12.67	11.15	10.84	14.91	12.92	14.05	368.44	449.99	450.18	475.3	414.16	389.84	436.92	358.47	408.55	331.65	251.84	293.26	347.32	226.29	200.03	340.71	297.43	300.8	Gh_D05G1946	Gh_D05G1946	ABSCISIC ACID-INSENSITIVE 5-like protein 5 [Source:UniProtKB/Swiss-Prot;Acc:Q9M7Q4]	Environmental Information Processing	Signal transduction	ko04075//Plant hormone signal transduction	GO:0005623//cell;GO:0043229//intracellular organelle;GO:0043226//organelle;GO:0043227//membrane-bounded organelle;GO:0043231//intracellular membrane-bounded organelle;GO:0044464//cell part;GO:0005634//nucleus;GO:0005622//intracellular;GO:0044424//intracellular part	GO:0003677//DNA binding;GO:0003676//nucleic acid binding;GO:0043565//sequence-specific DNA binding;GO:1901363//heterocyclic compound binding;GO:0097159//organic cyclic compound binding;GO:0001071//nucleic acid binding transcription factor activity;GO:0005488//binding;GO:0003700//sequence-specific DNA binding transcription factor activity	GO:0050789//regulation of biological process;GO:0034654//nucleobase-containing compound biosynthetic process;GO:0009725//response to hormone;GO:0032870//cellular response to hormone stimulus;GO:0010556//regulation of macromolecule biosynthetic process;GO:0080090//regulation of primary metabolic process;GO:0051716//cellular response to stimulus;GO:0006355//regulation of transcription, DNA-template…
Gh_D05G2495	0	0.09	0	0	0	0.1	0	0.06	0.05	0	0	0	0	0	0	0	0	0	0	2	0	0	0	2	0	1	1	0	0	0	0	0	0	0	0	0	Gh_D05G2495	Gh_D05G2495	ABSCISIC ACID-INSENSITIVE 5-like protein 5 [Source:UniProtKB/Swiss-Prot;Acc:Q9M7Q4]	Environmental Information Processing	Signal transduction	ko04075//Plant hormone signal transduction	GO:0005623//cell;GO:0043229//intracellular organelle;GO:0043226//organelle;GO:0043227//membrane-bounded organelle;GO:0043231//intracellular membrane-bounded organelle;GO:0044464//cell part;GO:0005634//nucleus;GO:0005622//intracellular;GO:0044424//intracellular part	GO:0003677//DNA binding;GO:0003676//nucleic acid binding;GO:0043565//sequence-specific DNA binding;GO:1901363//heterocyclic compound binding;GO:0097159//organic cyclic compound binding;GO:0001071//nucleic acid binding transcription factor activity;GO:0005488//binding;GO:0003700//sequence-specific DNA binding transcription factor activity	GO:0050789//regulation of biological process;GO:0034654//nucleobase-containing compound biosynthetic process;GO:0009725//response to hormone;GO:0032870//cellular response to hormone stimulus;GO:0010556//regulation of macromolecule biosynthetic process;GO:0080090//regulation of primary metabolic process;GO:0051716//cellular response to stimulus;GO:0006355//regulation of transcription, DNA-template…
Gh_D05G2714	8.67	4.91	6.44	5.17	6.4	6.14	6.34	6.56	7.78	7.45	7.12	6.25	6.57	8.36	10.17	4.96	6.04	6.37	143.58	83.82	95.87	80.26	127.19	97.62	112.46	92.49	117.6	127.08	96.36	99.92	126.42	119.03	131.75	79.46	97.56	95.68	Gh_D05G2714	Gh_D05G2714	ABSCISIC ACID-INSENSITIVE 5-like protein 2 [Source:UniProtKB/Swiss-Prot;Acc:Q9LES3]	Environmental Information Processing	Signal transduction	ko04075//Plant hormone signal transduction	GO:0044424//intracellular part;GO:0043227//membrane-bounded organelle;GO:0044464//cell part;GO:0005622//intracellular;GO:0005634//nucleus;GO:0043226//organelle;GO:0043229//intracellular organelle;GO:0043231//intracellular membrane-bounded organelle;GO:0005623//cell	GO:0043565//sequence-specific DNA binding;GO:0001071//nucleic acid binding transcription factor activity;GO:0097159//organic cyclic compound binding;GO:0003677//DNA binding;GO:0003700//sequence-specific DNA binding transcription factor activity;GO:0003676//nucleic acid binding;GO:0005488//binding;GO:1901363//heterocyclic compound binding	GO:0071229//cellular response to acid chemical;GO:0010033//response to organic substance;GO:0008152//metabolic process;GO:0065007//biological regulation;GO:0044699//single-organism process;GO:0009738//abscisic acid-activated signaling pathway;GO:0009755//hormone-mediated signaling pathway;GO:0019219//regulation of nucleobase-containing compound metabolic process;GO:0009737//response to abscisic a…
Gh_D06G0356	0	0.23	0.2	0.57	0.2	0.06	0	0.14	0	0	0.44	0.06	0.1	0.34	0.28	0.33	0	0	0	4	3	9	4	1	0	2	0	0	6	1	2	5	3.66	5.35	0	0	Gh_D06G0356	Gh_D06G0356	ABSCISIC ACID-INSENSITIVE 5-like protein 2 [Source:UniProtKB/Swiss-Prot;Acc:Q9LES3]	Environmental Information Processing	Signal transduction	ko04075//Plant hormone signal transduction	GO:0044424//intracellular part;GO:0043227//membrane-bounded organelle;GO:0044464//cell part;GO:0005622//intracellular;GO:0005634//nucleus;GO:0043226//organelle;GO:0043229//intracellular organelle;GO:0043231//intracellular membrane-bounded organelle;GO:0005623//cell	GO:0043565//sequence-specific DNA binding;GO:0001071//nucleic acid binding transcription factor activity;GO:0097159//organic cyclic compound binding;GO:0003677//DNA binding;GO:0003700//sequence-specific DNA binding transcription factor activity;GO:0003676//nucleic acid binding;GO:0005488//binding;GO:1901363//heterocyclic compound binding	GO:0071229//cellular response to acid chemical;GO:0010033//response to organic substance;GO:0008152//metabolic process;GO:0065007//biological regulation;GO:0044699//single-organism process;GO:0009738//abscisic acid-activated signaling pathway;GO:0009755//hormone-mediated signaling pathway;GO:0019219//regulation of nucleobase-containing compound metabolic process;GO:0009737//response to abscisic a…
Gh_D07G0147	0.58	0.75	0.86	0	0	0.6	1.08	0.68	0.84	1.68	0	0.2	0	1.12	1.48	0	0.39	0	3	4	4	0	0	3	6	3	4	9	0	1	0	5	6	0	2	0	Gh_D07G0147	Gh_D07G0147	ABSCISIC ACID-INSENSITIVE 5-like protein 5 [Source:UniProtKB/Swiss-Prot;Acc:Q9M7Q4]	Environmental Information Processing	Signal transduction	ko04075//Plant hormone signal transduction	GO:0005623//cell;GO:0043229//intracellular organelle;GO:0043226//organelle;GO:0043227//membrane-bounded organelle;GO:0043231//intracellular membrane-bounded organelle;GO:0044464//cell part;GO:0005634//nucleus;GO:0005622//intracellular;GO:0044424//intracellular part	GO:0003677//DNA binding;GO:0003676//nucleic acid binding;GO:0043565//sequence-specific DNA binding;GO:1901363//heterocyclic compound binding;GO:0097159//organic cyclic compound binding;GO:0001071//nucleic acid binding transcription factor activity;GO:0005488//binding;GO:0003700//sequence-specific DNA binding transcription factor activity	GO:0050789//regulation of biological process;GO:0034654//nucleobase-containing compound biosynthetic process;GO:0009725//response to hormone;GO:0032870//cellular response to hormone stimulus;GO:0010556//regulation of macromolecule biosynthetic process;GO:0080090//regulation of primary metabolic process;GO:0051716//cellular response to stimulus;GO:0006355//regulation of transcription, DNA-template…
Gh_D09G0926	0	0.05	0	0.05	0	0	0	0	0	0.19	0	0.26	0.09	0	0	0	0.05	0.05	0	1	0	1	0	0	0	0	0	4	0	5	2	0	0	0	1	1	Gh_D09G0926	Gh_D09G0926	ABSCISIC ACID-INSENSITIVE 5-like protein 1 [Source:UniProtKB/Swiss-Prot;Acc:Q8RYD6]	Environmental Information Processing	Signal transduction	ko04075//Plant hormone signal transduction	GO:0005622//intracellular;GO:0043229//intracellular organelle;GO:0044424//intracellular part;GO:0043226//organelle;GO:0043231//intracellular membrane-bounded organelle;GO:0005634//nucleus;GO:0044464//cell part;GO:0043227//membrane-bounded organelle;GO:0005623//cell	GO:0003700//sequence-specific DNA binding transcription factor activity;GO:0005515//protein binding;GO:0001071//nucleic acid binding transcription factor activity;GO:0097159//organic cyclic compound binding;GO:0043565//sequence-specific DNA binding;GO:0033613//activating transcription factor binding;GO:0008134//transcription factor binding;GO:0003676//nucleic acid binding;GO:0003677//DNA binding;…	GO:0009755//hormone-mediated signaling pathway;GO:0010467//gene expression;GO:0034641//cellular nitrogen compound metabolic process;GO:0044700//single organism signaling;GO:0010557//positive regulation of macromolecule biosynthetic process;GO:0097659//nucleic acid-templated transcription;GO:0006355//regulation of transcription, DNA-templated;GO:0071229//cellular response to acid chemical;GO:00098…
Gh_D09G1317	0.65	0.64	0.88	0.46	1.23	0.18	0.64	0.95	1.04	1.43	0.51	1.27	0.57	1.04	0.84	0.42	0.42	0.45	13.85	14.08	16.91	9.23	31.53	3.62	14.61	17.23	20.22	31.4	8.89	26.19	14.13	19.04	14	8.77	8.7	8.71	Gh_D09G1317	Gh_D09G1317	Protein ABSCISIC ACID-INSENSITIVE 5 [Source:UniProtKB/Swiss-Prot;Acc:Q9SJN0]	Environmental Information Processing	Signal transduction	ko04075//Plant hormone signal transduction	GO:0043231//intracellular membrane-bounded organelle;GO:0005623//cell;GO:0043227//membrane-bounded organelle;GO:0005622//intracellular;GO:0005634//nucleus;GO:0044464//cell part;GO:0043226//organelle;GO:0043229//intracellular organelle;GO:0044424//intracellular part	GO:0003700//sequence-specific DNA binding transcription factor activity;GO:0001071//nucleic acid binding transcription factor activity;GO:1901363//heterocyclic compound binding;GO:0003676//nucleic acid binding;GO:0003677//DNA binding;GO:0043565//sequence-specific DNA binding;GO:0005488//binding;GO:0097159//organic cyclic compound binding	GO:0071229//cellular response to acid chemical;GO:0071396//cellular response to lipid;GO:0034654//nucleobase-containing compound biosynthetic process;GO:0048608//reproductive structure development;GO:0018130//heterocycle biosynthetic process;GO:0034645//cellular macromolecule biosynthetic process;GO:0043170//macromolecule metabolic process;GO:0071704//organic substance metabolic process;GO:001922…
Gh_D12G0214	32.52	40.13	31.13	35.83	36.85	36.02	29.54	33.07	38.96	28.46	30.17	33.33	28.23	27.1	29.21	28.57	31.44	30.52	714.22	907.77	614.35	737.59	971.06	759.02	695.23	618.65	781.24	644.25	541.52	706.34	720.22	511.5	501.63	607.33	673.21	607.83	Gh_D12G0214	Gh_D12G0214	ABSCISIC ACID-INSENSITIVE 5-like protein 6 [Source:UniProtKB/Swiss-Prot;Acc:Q9M7Q3]	Environmental Information Processing	Signal transduction	ko04075//Plant hormone signal transduction	GO:0005623//cell;GO:0043227//membrane-bounded organelle;GO:0005634//nucleus;GO:0044464//cell part;GO:0044424//intracellular part;GO:0043229//intracellular organelle;GO:0005622//intracellular;GO:0043226//organelle;GO:0043231//intracellular membrane-bounded organelle	GO:0005488//binding;GO:0043565//sequence-specific DNA binding;GO:0001071//nucleic acid binding transcription factor activity;GO:0003676//nucleic acid binding;GO:0003677//DNA binding;GO:0097159//organic cyclic compound binding;GO:1901363//heterocyclic compound binding;GO:0003700//sequence-specific DNA binding transcription factor activity	GO:0060255//regulation of macromolecule metabolic process;GO:0010468//regulation of gene expression;GO:0051252//regulation of RNA metabolic process;GO:0009628//response to abiotic stimulus;GO:0006725//cellular aromatic compound metabolic process;GO:0050789//regulation of biological process;GO:0044260//cellular macromolecule metabolic process;GO:1901360//organic cyclic compound metabolic process;G…
Gh_D13G0400	40.34	37.98	33.06	32.02	38.87	35.12	37.86	40.77	44.38	31.96	28.04	31.78	25.86	26.22	20.49	22.2	23.69	28.94	848.48	822.99	625	631.45	981	709	853.47	730.46	852.43	693	482	645	631.92	474	337	452	486	552	Gh_D13G0400	Gh_D13G0400	ABSCISIC ACID-INSENSITIVE 5-like protein 6 [Source:UniProtKB/Swiss-Prot;Acc:Q9M7Q3]	Environmental Information Processing	Signal transduction	ko04075//Plant hormone signal transduction	GO:0005623//cell;GO:0043227//membrane-bounded organelle;GO:0005634//nucleus;GO:0044464//cell part;GO:0044424//intracellular part;GO:0043229//intracellular organelle;GO:0005622//intracellular;GO:0043226//organelle;GO:0043231//intracellular membrane-bounded organelle	GO:0005488//binding;GO:0043565//sequence-specific DNA binding;GO:0001071//nucleic acid binding transcription factor activity;GO:0003676//nucleic acid binding;GO:0003677//DNA binding;GO:0097159//organic cyclic compound binding;GO:1901363//heterocyclic compound binding;GO:0003700//sequence-specific DNA binding transcription factor activity	GO:0060255//regulation of macromolecule metabolic process;GO:0010468//regulation of gene expression;GO:0051252//regulation of RNA metabolic process;GO:0009628//response to abiotic stimulus;GO:0006725//cellular aromatic compound metabolic process;GO:0050789//regulation of biological process;GO:0044260//cellular macromolecule metabolic process;GO:1901360//organic cyclic compound metabolic process;G…
Gh_D13G2405	13.49	13.96	13.81	14.84	12.64	13.57	9.64	8.75	8.84	7.29	10.24	7.79	5.68	2.13	2.03	8.72	9.72	5.93	220.67	235.27	202.97	227.57	248	213	169	121.88	132	122.87	136.86	123	108	30	26	138	155	88	Gh_D13G2405	Gh_D13G2405	ABSCISIC ACID-INSENSITIVE 5-like protein 2 [Source:UniProtKB/Swiss-Prot;Acc:Q9LES3]	Environmental Information Processing	Signal transduction	ko04075//Plant hormone signal transduction	GO:0044424//intracellular part;GO:0043227//membrane-bounded organelle;GO:0044464//cell part;GO:0005622//intracellular;GO:0005634//nucleus;GO:0043226//organelle;GO:0043229//intracellular organelle;GO:0043231//intracellular membrane-bounded organelle;GO:0005623//cell	GO:0043565//sequence-specific DNA binding;GO:0001071//nucleic acid binding transcription factor activity;GO:0097159//organic cyclic compound binding;GO:0003677//DNA binding;GO:0003700//sequence-specific DNA binding transcription factor activity;GO:0003676//nucleic acid binding;GO:0005488//binding;GO:1901363//heterocyclic compound binding	GO:0071229//cellular response to acid chemical;GO:0010033//response to organic substance;GO:0008152//metabolic process;GO:0065007//biological regulation;GO:0044699//single-organism process;GO:0009738//abscisic acid-activated signaling pathway;GO:0009755//hormone-mediated signaling pathway;GO:0019219//regulation of nucleobase-containing compound metabolic process;GO:0009737//response to abscisic a…
Gh_Sca006599G01	2.87	2.13	2.35	1.79	3.1	1.82	1.81	2.13	2.3	1.8	2.93	1.93	1.57	2.67	1.68	1.22	1.98	2.08	61.15	46.92	45.09	35.77	79.47	37.38	41.39	38.77	44.78	39.6	51.11	39.81	38.87	48.96	28	25.23	41.3	40.29	Gh_Sca006599G01	Gh_Sca006599G01	Protein ABSCISIC ACID-INSENSITIVE 5 [Source:UniProtKB/Swiss-Prot;Acc:Q9SJN0]	Environmental Information Processing	Signal transduction	ko04075//Plant hormone signal transduction	GO:0043231//intracellular membrane-bounded organelle;GO:0005623//cell;GO:0043227//membrane-bounded organelle;GO:0005622//intracellular;GO:0005634//nucleus;GO:0044464//cell part;GO:0043226//organelle;GO:0043229//intracellular organelle;GO:0044424//intracellular part	GO:0003700//sequence-specific DNA binding transcription factor activity;GO:0001071//nucleic acid binding transcription factor activity;GO:1901363//heterocyclic compound binding;GO:0003676//nucleic acid binding;GO:0003677//DNA binding;GO:0043565//sequence-specific DNA binding;GO:0005488//binding;GO:0097159//organic cyclic compound binding	GO:0071229//cellular response to acid chemical;GO:0071396//cellular response to lipid;GO:0034654//nucleobase-containing compound biosynthetic process;GO:0048608//reproductive structure development;GO:0018130//heterocycle biosynthetic process;GO:0034645//cellular macromolecule biosynthetic process;GO:0043170//macromolecule metabolic process;GO:0071704//organic substance metabolic process;GO:001922…
Gh_Sca062674G01	0	0	0	0	0	0	0	0	0	0	0	0	0	0	0	0	0	0	0	0	0	0	0	0	0	0	0	0	0	0	0	0	0	0	0	0	Gh_Sca062674G01	Gh_Sca062674G01	Basic-leucine zipper (bZIP) transcription factor family protein [Source:TAIR;Acc:AT5G44080]	Environmental Information Processing	Signal transduction	ko04075//Plant hormone signal transduction	-	GO:0005488//binding;GO:0003677//DNA binding;GO:0003700//sequence-specific DNA binding transcription factor activity;GO:0001071//nucleic acid binding transcription factor activity;GO:0003676//nucleic acid binding;GO:1901363//heterocyclic compound binding;GO:0043565//sequence-specific DNA binding;GO:0097159//organic cyclic compound binding	GO:0007154//cell communication;GO:0060255//regulation of macromolecule metabolic process;GO:0035967//cellular response to topologically incorrect protein;GO:0044700//single organism signaling;GO:0010468//regulation of gene expression;GO:0050789//regulation of biological process;GO:0070887//cellular response to chemical stimulus;GO:0019219//regulation of nucleobase-containing compound metabolic pr…
XLOC_015697	6.93	6.53	7.04	7.08	6.49	6.42	8.19	6.87	8.23	7.45	7.9	8.57	7.73	5.19	6.35	5.99	6.78	6.47	218	209	210	211	248	185	260	182	220	244	203	250	268	142	148	162	219	174	ABF2	XLOC_015697	ABSCISIC ACID-INSENSITIVE 5-like protein 5 [Source:UniProtKB/Swiss-Prot;Acc:Q9M7Q4]	Environmental Information Processing	Signal transduction	ko04075//Plant hormone signal transduction	GO:0005623//cell;GO:0043229//intracellular organelle;GO:0043226//organelle;GO:0043227//membrane-bounded organelle;GO:0043231//intracellular membrane-bounded organelle;GO:0044464//cell part;GO:0005634//nucleus;GO:0005622//intracellular;GO:0044424//intracellular part	GO:0003677//DNA binding;GO:0003676//nucleic acid binding;GO:0043565//sequence-specific DNA binding;GO:1901363//heterocyclic compound binding;GO:0097159//organic cyclic compound binding;GO:0001071//nucleic acid binding transcription factor activity;GO:0005488//binding;GO:0003700//sequence-specific DNA binding transcription factor activity	GO:0050789//regulation of biological process;GO:0034654//nucleobase-containing compound biosynthetic process;GO:0009725//response to hormone;GO:0032870//cellular response to hormone stimulus;GO:0010556//regulation of macromolecule biosynthetic process;GO:0080090//regulation of primary metabolic process;GO:0051716//cellular response to stimulus;GO:0006355//regulation of transcription, DNA-template…
Gh_A02G0340	11.61	8.3	8.95	14.44	13.49	13.47	9.31	10.76	11.15	12.05	10.09	14.14	6.66	9.95	8.59	11.15	12.48	11.06	114	84	79	133	159	127	98	90	100	122	81	134	76	84	66	106.03	119.54	98.54	Gh_A02G0340	Gh_A02G0340	Auxin-responsive protein IAA4 [Source:UniProtKB/Swiss-Prot;Acc:P33077]	Environmental Information Processing	Signal transduction	ko04075//Plant hormone signal transduction	GO:0005622//intracellular;GO:0043231//intracellular membrane-bounded organelle;GO:0044424//intracellular part;GO:0044464//cell part;GO:0043226//organelle;GO:0043229//intracellular organelle;GO:0005623//cell;GO:0043227//membrane-bounded organelle;GO:0005634//nucleus	GO:0001071//nucleic acid binding transcription factor activity;GO:0003700//sequence-specific DNA binding transcription factor activity;GO:0044212//transcription regulatory region DNA binding;GO:0005488//binding;GO:0001067//regulatory region nucleic acid binding;GO:1901363//heterocyclic compound binding;GO:0003677//DNA binding;GO:0005515//protein binding;GO:0046983//protein dimerization activity;G…	GO:0010467//gene expression;GO:0044700//single organism signaling;GO:0016070//RNA metabolic process;GO:0006139//nucleobase-containing compound metabolic process;GO:1901362//organic cyclic compound biosynthetic process;GO:0009733//response to auxin;GO:0009059//macromolecule biosynthetic process;GO:0071310//cellular response to organic substance;GO:1901360//organic cyclic compound metabolic process…
Gh_A02G0341	32.4	32.38	23.76	58.45	51.34	50.33	48.52	65.29	69.89	33.39	28.5	34.4	67.69	57.75	59.78	69.59	120.64	108.49	418.16	430.52	275.73	707.29	795.22	623.48	671.21	717.89	823.91	444.27	300.68	428.45	1015.03	640.73	603.4	869.43	1518.64	1270.11	Gh_A02G0341	Gh_A02G0341	Auxin-responsive protein IAA14 [Source:UniProtKB/Swiss-Prot;Acc:Q38832]	Environmental Information Processing	Signal transduction	ko04075//Plant hormone signal transduction	GO:0005634//nucleus;GO:0044424//intracellular part;GO:0043227//membrane-bounded organelle;GO:0044464//cell part;GO:0005623//cell;GO:0005622//intracellular;GO:0043231//intracellular membrane-bounded organelle;GO:0043229//intracellular organelle;GO:0043226//organelle	GO:0005515//protein binding;GO:0001071//nucleic acid binding transcription factor activity;GO:0003700//sequence-specific DNA binding transcription factor activity;GO:0005488//binding;GO:0046983//protein dimerization activity	GO:0010033//response to organic substance;GO:0046483//heterocycle metabolic process;GO:0032774//RNA biosynthetic process;GO:1903507//negative regulation of nucleic acid-templated transcription;GO:0006807//nitrogen compound metabolic process;GO:0007154//cell communication;GO:0070887//cellular response to chemical stimulus;GO:0007275//multicellular organismal development;GO:0031326//regulation of c…
Gh_A02G1156	2.71	2.06	1.91	3.05	3.97	2.56	3.05	3.93	3.76	4.84	3.3	2.79	2.74	5.13	3.14	4.14	3.18	2.88	33.23	26.01	21.02	35	58.27	30.04	40	40.95	42	61.02	33	33	39	54	30.01	49	38	32	Gh_A02G1156	Gh_A02G1156	Auxin-responsive protein IAA27 [Source:UniProtKB/Swiss-Prot;Acc:Q9ZSY8]	Environmental Information Processing	Signal transduction	ko04075//Plant hormone signal transduction	GO:0005622//intracellular;GO:0043227//membrane-bounded organelle;GO:0005623//cell;GO:0044424//intracellular part;GO:0043229//intracellular organelle;GO:0044464//cell part;GO:0043226//organelle;GO:0043231//intracellular membrane-bounded organelle;GO:0005634//nucleus	GO:0046983//protein dimerization activity;GO:0005515//protein binding;GO:0001071//nucleic acid binding transcription factor activity;GO:0005488//binding;GO:0003700//sequence-specific DNA binding transcription factor activity	GO:0006139//nucleobase-containing compound metabolic process;GO:2000112//regulation of cellular macromolecule biosynthetic process;GO:1901362//organic cyclic compound biosynthetic process;GO:0009734//auxin-activated signaling pathway;GO:0065007//biological regulation;GO:1901360//organic cyclic compound metabolic process;GO:0032870//cellular response to hormone stimulus;GO:0044249//cellular biosyn…
Gh_A02G1406	24.37	22.1	25.78	17.58	19.3	15.54	12.75	14.04	14.93	22.25	20.69	19.81	15.64	15.56	17.19	17.16	14.31	14.1	505.04	471.91	480.27	341.55	479.9	309.07	283.23	247.95	282.57	475.36	350.37	396.21	376.44	277.1	278.62	344.3	289.25	265.01	Gh_A02G1406	Gh_A02G1406	Auxin-responsive protein IAA9 [Source:UniProtKB/Swiss-Prot;Acc:Q38827]	Environmental Information Processing	Signal transduction	ko04075//Plant hormone signal transduction	GO:0043227//membrane-bounded organelle;GO:0044464//cell part;GO:0043231//intracellular membrane-bounded organelle;GO:0043226//organelle;GO:0043229//intracellular organelle;GO:0005622//intracellular;GO:0005634//nucleus;GO:0005623//cell;GO:0044424//intracellular part	GO:0005488//binding;GO:0001071//nucleic acid binding transcription factor activity;GO:0005515//protein binding;GO:0046983//protein dimerization activity;GO:0003700//sequence-specific DNA binding transcription factor activity	GO:0010467//gene expression;GO:0090304//nucleic acid metabolic process;GO:0050896//response to stimulus;GO:0065007//biological regulation;GO:0044763//single-organism cellular process;GO:0006807//nitrogen compound metabolic process;GO:0009889//regulation of biosynthetic process;GO:1903506//regulation of nucleic acid-templated transcription;GO:0006725//cellular aromatic compound metabolic process;G…
Gh_A05G0079	5.87	2.73	2.71	2.07	4.12	1.97	1.14	1.62	1.51	4.83	3.66	2.87	1.83	2.31	3.08	2.66	3.97	2.19	76.73	36.72	31.85	25.3	64.55	24.67	16	18	18	65	39.03	36.12	27.74	25.93	31.44	33.59	50.61	26	Gh_A05G0079	Gh_A05G0079	Auxin-responsive protein IAA29 [Source:UniProtKB/Swiss-Prot;Acc:Q93WC4]	Environmental Information Processing	Signal transduction	ko04075//Plant hormone signal transduction	GO:0044464//cell part;GO:0043227//membrane-bounded organelle;GO:0043229//intracellular organelle;GO:0005634//nucleus;GO:0043231//intracellular membrane-bounded organelle;GO:0043226//organelle;GO:0044424//intracellular part;GO:0005622//intracellular;GO:0005623//cell	GO:0001071//nucleic acid binding transcription factor activity;GO:0046983//protein dimerization activity;GO:0003700//sequence-specific DNA binding transcription factor activity;GO:0005488//binding;GO:0005515//protein binding	GO:0071704//organic substance metabolic process;GO:0006351//transcription, DNA-templated;GO:0071495//cellular response to endogenous stimulus;GO:0050896//response to stimulus;GO:0009725//response to hormone;GO:0009416//response to light stimulus;GO:0051252//regulation of RNA metabolic process;GO:0009058//biosynthetic process;GO:0010114//response to red light;GO:0032774//RNA biosynthetic process;G…
Gh_A05G0356	11.82	12.17	11.5	12.13	11.35	13.41	10.28	13.63	13.17	7.5	6.73	6.82	6.08	7.23	4.92	8.08	5.1	6.46	217.02	230.11	189.79	208.7	250.02	236.27	202.33	213.22	220.76	141.95	101.01	120.89	129.64	114.06	70.66	143.53	91.25	107.63	Gh_A05G0356	Gh_A05G0356	Auxin-responsive protein IAA18 [Source:UniProtKB/Swiss-Prot;Acc:O24408]	Environmental Information Processing	Signal transduction	ko04075//Plant hormone signal transduction	GO:0044464//cell part;GO:0043226//organelle;GO:0043229//intracellular organelle;GO:0044424//intracellular part;GO:0005622//intracellular;GO:0005623//cell;GO:0005634//nucleus;GO:0043231//intracellular membrane-bounded organelle;GO:0043227//membrane-bounded organelle	GO:0005488//binding;GO:0003700//sequence-specific DNA binding transcription factor activity;GO:0005515//protein binding;GO:0001071//nucleic acid binding transcription factor activity;GO:0046983//protein dimerization activity	GO:0009755//hormone-mediated signaling pathway;GO:0051716//cellular response to stimulus;GO:0009058//biosynthetic process;GO:0034654//nucleobase-containing compound biosynthetic process;GO:0050896//response to stimulus;GO:0006807//nitrogen compound metabolic process;GO:0044260//cellular macromolecule metabolic process;GO:0044238//primary metabolic process;GO:0031326//regulation of cellular biosyn…
Gh_A05G0429	7.31	5.96	5.31	5.82	8.14	7.73	5.93	5.11	8.87	4.88	4.59	6.89	4.26	4.56	4.04	3.61	3.85	4.14	85.75	72	55.99	64	114.5	87	74.53	51	95	59	44	78	58	46	37	41	44	44	Gh_A05G0429	Gh_A05G0429	Auxin-responsive protein IAA29 [Source:UniProtKB/Swiss-Prot;Acc:Q93WC4]	Environmental Information Processing	Signal transduction	ko04075//Plant hormone signal transduction	GO:0044464//cell part;GO:0043227//membrane-bounded organelle;GO:0043229//intracellular organelle;GO:0005634//nucleus;GO:0043231//intracellular membrane-bounded organelle;GO:0043226//organelle;GO:0044424//intracellular part;GO:0005622//intracellular;GO:0005623//cell	GO:0001071//nucleic acid binding transcription factor activity;GO:0046983//protein dimerization activity;GO:0003700//sequence-specific DNA binding transcription factor activity;GO:0005488//binding;GO:0005515//protein binding	GO:0071704//organic substance metabolic process;GO:0006351//transcription, DNA-templated;GO:0071495//cellular response to endogenous stimulus;GO:0050896//response to stimulus;GO:0009725//response to hormone;GO:0009416//response to light stimulus;GO:0051252//regulation of RNA metabolic process;GO:0009058//biosynthetic process;GO:0010114//response to red light;GO:0032774//RNA biosynthetic process;G…
Gh_A05G1067	48.14	65.68	41.65	59.73	84.98	79.11	62.65	58.38	43	47.73	34.77	38.82	55.47	88.41	89.73	73.03	63.44	76.32	517.46	727.26	402.39	601.89	1096.11	816.09	721.65	534.51	422.09	528.73	305.44	402.66	692.53	816.75	754.25	759.73	665.02	744.03	Gh_A05G1067	Gh_A05G1067	Auxin-responsive protein IAA16 [Source:UniProtKB/Swiss-Prot;Acc:O24407]	Environmental Information Processing	Signal transduction	ko04075//Plant hormone signal transduction	GO:0043229//intracellular organelle;GO:0044464//cell part;GO:0005634//nucleus;GO:0043226//organelle;GO:0005622//intracellular;GO:0043227//membrane-bounded organelle;GO:0005623//cell;GO:0044424//intracellular part;GO:0043231//intracellular membrane-bounded organelle	GO:0046983//protein dimerization activity;GO:0001071//nucleic acid binding transcription factor activity;GO:0005488//binding;GO:0005515//protein binding;GO:0003700//sequence-specific DNA binding transcription factor activity	GO:1901362//organic cyclic compound biosynthetic process;GO:0006725//cellular aromatic compound metabolic process;GO:0080090//regulation of primary metabolic process;GO:0007154//cell communication;GO:0031323//regulation of cellular metabolic process;GO:0090304//nucleic acid metabolic process;GO:0071365//cellular response to auxin stimulus;GO:0044238//primary metabolic process;GO:0071495//cellular…
Gh_A05G1068	21.9	21.81	21.19	21.63	32.82	22.2	18.72	21.47	14.87	29.55	24.98	29.88	37.61	35.6	36.63	32.26	41.86	37.31	206.07	211.43	179.26	190.79	370.63	200.5	188.83	172.13	127.84	286.64	192.13	271.4	411.16	287.93	269.55	293.9	384.22	318.48	Gh_A05G1068	Gh_A05G1068	Auxin-responsive protein IAA19 [Source:UniProtKB/Swiss-Prot;Acc:O24409]	Environmental Information Processing	Signal transduction	ko04075//Plant hormone signal transduction	GO:0044424//intracellular part;GO:0044464//cell part;GO:0005634//nucleus;GO:0005623//cell;GO:0043229//intracellular organelle;GO:0043226//organelle;GO:0043231//intracellular membrane-bounded organelle;GO:0043227//membrane-bounded organelle;GO:0005622//intracellular	GO:0046983//protein dimerization activity;GO:0003700//sequence-specific DNA binding transcription factor activity;GO:0001071//nucleic acid binding transcription factor activity;GO:0005515//protein binding;GO:0005488//binding	GO:0009725//response to hormone;GO:0044702//single organism reproductive process;GO:0050896//response to stimulus;GO:0016070//RNA metabolic process;GO:0018130//heterocycle biosynthetic process;GO:0023052//signaling;GO:0019222//regulation of metabolic process;GO:1903506//regulation of nucleic acid-templated transcription;GO:0032774//RNA biosynthetic process;GO:0032870//cellular response to hormone…
Gh_A05G1076	48.93	39.5	37.92	46.07	42.65	46.37	53.6	60.06	59.6	32.54	37.67	36.67	42.75	36.34	34.31	43.38	39.68	43.63	978.79	814.07	681.77	864.05	1023.74	890.31	1149.12	1023.41	1088.95	670.96	615.95	707.84	993.42	624.78	536.74	840.06	774.19	791.71	Gh_A05G1076	Gh_A05G1076	Auxin-responsive protein IAA27 [Source:UniProtKB/Swiss-Prot;Acc:Q9ZSY8]	Environmental Information Processing	Signal transduction	ko04075//Plant hormone signal transduction	GO:0005622//intracellular;GO:0043227//membrane-bounded organelle;GO:0005623//cell;GO:0044424//intracellular part;GO:0043229//intracellular organelle;GO:0044464//cell part;GO:0043226//organelle;GO:0043231//intracellular membrane-bounded organelle;GO:0005634//nucleus	GO:0046983//protein dimerization activity;GO:0005515//protein binding;GO:0001071//nucleic acid binding transcription factor activity;GO:0005488//binding;GO:0003700//sequence-specific DNA binding transcription factor activity	GO:0006139//nucleobase-containing compound metabolic process;GO:2000112//regulation of cellular macromolecule biosynthetic process;GO:1901362//organic cyclic compound biosynthetic process;GO:0009734//auxin-activated signaling pathway;GO:0065007//biological regulation;GO:1901360//organic cyclic compound metabolic process;GO:0032870//cellular response to hormone stimulus;GO:0044249//cellular biosyn…
Gh_A05G1092	16.54	10.05	9.26	7.83	9.13	8.73	6.03	6.56	8.34	13	11.33	15.18	10.09	7.9	8.83	8.09	7.75	7.19	302	189	152	134	200	153	118	102	139	244.71	169	267.41	214.01	124	126	143.01	138	119	Gh_A05G1092	Gh_A05G1092	Auxin-responsive protein IAA26 [Source:UniProtKB/Swiss-Prot;Acc:Q8LAL2]	Environmental Information Processing	Signal transduction	ko04075//Plant hormone signal transduction	GO:0044464//cell part;GO:0043231//intracellular membrane-bounded organelle;GO:0044424//intracellular part;GO:0005634//nucleus;GO:0043226//organelle;GO:0043227//membrane-bounded organelle;GO:0043229//intracellular organelle;GO:0005623//cell;GO:0005622//intracellular	GO:0005488//binding;GO:0003700//sequence-specific DNA binding transcription factor activity;GO:0005515//protein binding;GO:0001071//nucleic acid binding transcription factor activity;GO:0046983//protein dimerization activity	GO:0070887//cellular response to chemical stimulus;GO:1901360//organic cyclic compound metabolic process;GO:0019219//regulation of nucleobase-containing compound metabolic process;GO:0046483//heterocycle metabolic process;GO:0044238//primary metabolic process;GO:0071310//cellular response to organic substance;GO:0006351//transcription, DNA-templated;GO:0009725//response to hormone;GO:0009734//aux…
Gh_A05G2857	0	0.11	0.26	0.5	0.19	0	0	0	0	0	0.14	0	0.3	0.14	0	0	0	0	0	1	2	4	2	0	0	0	0	0	1	0	3	1	0	0	0	0	Gh_A05G2857	Gh_A05G2857	Auxin-responsive protein IAA29 [Source:UniProtKB/Swiss-Prot;Acc:Q93WC4]	Environmental Information Processing	Signal transduction	ko04075//Plant hormone signal transduction	GO:0044464//cell part;GO:0043227//membrane-bounded organelle;GO:0043229//intracellular organelle;GO:0005634//nucleus;GO:0043231//intracellular membrane-bounded organelle;GO:0043226//organelle;GO:0044424//intracellular part;GO:0005622//intracellular;GO:0005623//cell	GO:0001071//nucleic acid binding transcription factor activity;GO:0046983//protein dimerization activity;GO:0003700//sequence-specific DNA binding transcription factor activity;GO:0005488//binding;GO:0005515//protein binding	GO:0071704//organic substance metabolic process;GO:0006351//transcription, DNA-templated;GO:0071495//cellular response to endogenous stimulus;GO:0050896//response to stimulus;GO:0009725//response to hormone;GO:0009416//response to light stimulus;GO:0051252//regulation of RNA metabolic process;GO:0009058//biosynthetic process;GO:0010114//response to red light;GO:0032774//RNA biosynthetic process;G…
Gh_A05G3764	179.76	171.02	157.93	148.12	170.26	160.99	187.5	209.52	183.56	129.87	126.33	138.36	167.31	132.28	112.1	128.82	155.03	152.15	3402	3334.19	2686.44	2627.9	3866.66	2924.03	3802.7	3377.7	3172.59	2533.38	1953.88	2526.77	3678.36	2151.79	1659.12	2359.7	2861.35	2611.56	Gh_A05G3764	Gh_A05G3764	Auxin-responsive protein IAA8 [Source:UniProtKB/Swiss-Prot;Acc:Q38826]	Environmental Information Processing	Signal transduction	ko04075//Plant hormone signal transduction	GO:0043229//intracellular organelle;GO:0005622//intracellular;GO:0005623//cell;GO:0044464//cell part;GO:0043226//organelle;GO:0043231//intracellular membrane-bounded organelle;GO:0043227//membrane-bounded organelle;GO:0044424//intracellular part;GO:0005634//nucleus	GO:0005515//protein binding;GO:0046983//protein dimerization activity;GO:0005488//binding	GO:2001141//regulation of RNA biosynthetic process;GO:0043170//macromolecule metabolic process;GO:0019219//regulation of nucleobase-containing compound metabolic process;GO:0080090//regulation of primary metabolic process;GO:0044238//primary metabolic process;GO:0044700//single organism signaling;GO:0019222//regulation of metabolic process;GO:0010033//response to organic substance;GO:0019438//aro…
Gh_A05G3954	386.96	344.6	299.12	306.53	344.73	355.18	362.27	380.41	383.87	479.9	457.34	437.12	353.93	417.85	481.21	281.18	348.54	381.62	6188.88	5677.81	4300.1	4596.01	6616.11	5451.86	6209.32	5182.71	5606.89	7911.35	5977.89	6746.46	6575.87	5744.1	6018.66	4352.85	5436.35	5535.84	Gh_A05G3954	Gh_A05G3954	Auxin-responsive protein IAA27 [Source:UniProtKB/Swiss-Prot;Acc:Q9ZSY8]	Environmental Information Processing	Signal transduction	ko04075//Plant hormone signal transduction	GO:0005622//intracellular;GO:0043227//membrane-bounded organelle;GO:0005623//cell;GO:0044424//intracellular part;GO:0043229//intracellular organelle;GO:0044464//cell part;GO:0043226//organelle;GO:0043231//intracellular membrane-bounded organelle;GO:0005634//nucleus	GO:0046983//protein dimerization activity;GO:0005515//protein binding;GO:0001071//nucleic acid binding transcription factor activity;GO:0005488//binding;GO:0003700//sequence-specific DNA binding transcription factor activity	GO:0006139//nucleobase-containing compound metabolic process;GO:2000112//regulation of cellular macromolecule biosynthetic process;GO:1901362//organic cyclic compound biosynthetic process;GO:0009734//auxin-activated signaling pathway;GO:0065007//biological regulation;GO:1901360//organic cyclic compound metabolic process;GO:0032870//cellular response to hormone stimulus;GO:0044249//cellular biosyn…
Gh_A06G0239	227.59	211.2	179.16	233.7	241.06	253.16	306.41	341.47	326.11	205.39	217.24	212.39	235.41	204.26	196	210.99	265.63	252.18	4190.1	4005.68	2964.9	4033.51	5325.7	4473.15	6045.41	5355.26	5483.08	3897.62	3268.68	3773.35	5034.85	3232.32	2821.91	3759.8	4769.28	4210.95	Gh_A06G0239	Gh_A06G0239	Auxin-responsive protein IAA9 [Source:UniProtKB/Swiss-Prot;Acc:Q38827]	Environmental Information Processing	Signal transduction	ko04075//Plant hormone signal transduction	GO:0043227//membrane-bounded organelle;GO:0044464//cell part;GO:0043231//intracellular membrane-bounded organelle;GO:0043226//organelle;GO:0043229//intracellular organelle;GO:0005622//intracellular;GO:0005634//nucleus;GO:0005623//cell;GO:0044424//intracellular part	GO:0005488//binding;GO:0001071//nucleic acid binding transcription factor activity;GO:0005515//protein binding;GO:0046983//protein dimerization activity;GO:0003700//sequence-specific DNA binding transcription factor activity	GO:0010467//gene expression;GO:0090304//nucleic acid metabolic process;GO:0050896//response to stimulus;GO:0065007//biological regulation;GO:0044763//single-organism cellular process;GO:0006807//nitrogen compound metabolic process;GO:0009889//regulation of biosynthetic process;GO:1903506//regulation of nucleic acid-templated transcription;GO:0006725//cellular aromatic compound metabolic process;G…
Gh_A06G1644	0	0	0	0	0	0	0	0	0	0	0	0	0	0	0	0.2	0	0	0	0	0	0	0	0	0	0	0	0	0	0	0	0	0	1	0	0	Gh_A06G1644	Gh_A06G1644	Auxin-responsive protein IAA19 [Source:UniProtKB/Swiss-Prot;Acc:O24409]	Environmental Information Processing	Signal transduction	ko04075//Plant hormone signal transduction	GO:0044424//intracellular part;GO:0044464//cell part;GO:0005634//nucleus;GO:0005623//cell;GO:0043229//intracellular organelle;GO:0043226//organelle;GO:0043231//intracellular membrane-bounded organelle;GO:0043227//membrane-bounded organelle;GO:0005622//intracellular	GO:0046983//protein dimerization activity;GO:0003700//sequence-specific DNA binding transcription factor activity;GO:0001071//nucleic acid binding transcription factor activity;GO:0005515//protein binding;GO:0005488//binding	GO:0009725//response to hormone;GO:0044702//single organism reproductive process;GO:0050896//response to stimulus;GO:0016070//RNA metabolic process;GO:0018130//heterocycle biosynthetic process;GO:0023052//signaling;GO:0019222//regulation of metabolic process;GO:1903506//regulation of nucleic acid-templated transcription;GO:0032774//RNA biosynthetic process;GO:0032870//cellular response to hormone…
Gh_A06G1664	25.35	18.24	15.22	11.41	11.86	10.56	10.43	10.76	18.55	15.8	13.26	20.08	7.41	10.18	12.43	3.66	3.99	4.36	365	270.6	197	154	205	146	161	132	244	234.58	156	279	124	126	140	51	56	57	Gh_A06G1664	Gh_A06G1664	Auxin-responsive protein IAA26 [Source:UniProtKB/Swiss-Prot;Acc:Q8LAL2]	Environmental Information Processing	Signal transduction	ko04075//Plant hormone signal transduction	GO:0044464//cell part;GO:0043231//intracellular membrane-bounded organelle;GO:0044424//intracellular part;GO:0005634//nucleus;GO:0043226//organelle;GO:0043227//membrane-bounded organelle;GO:0043229//intracellular organelle;GO:0005623//cell;GO:0005622//intracellular	GO:0005488//binding;GO:0003700//sequence-specific DNA binding transcription factor activity;GO:0005515//protein binding;GO:0001071//nucleic acid binding transcription factor activity;GO:0046983//protein dimerization activity	GO:0070887//cellular response to chemical stimulus;GO:1901360//organic cyclic compound metabolic process;GO:0019219//regulation of nucleobase-containing compound metabolic process;GO:0046483//heterocycle metabolic process;GO:0044238//primary metabolic process;GO:0071310//cellular response to organic substance;GO:0006351//transcription, DNA-templated;GO:0009725//response to hormone;GO:0009734//aux…
Gh_A07G0317	1.2	1.21	2.12	1.65	0.41	0.63	1.7	5.42	7.72	2.3	2.02	2.72	1.46	1.66	2.18	1.54	2.16	4.5	13.44	14.01	21.35	17.33	5.58	6.8	20.38	51.74	79.06	26.61	18.55	29.46	19	16	19.15	16.7	23.59	45.76	Gh_A07G0317	Gh_A07G0317	Auxin-responsive protein IAA29 [Source:UniProtKB/Swiss-Prot;Acc:Q93WC4]	Environmental Information Processing	Signal transduction	ko04075//Plant hormone signal transduction	GO:0044464//cell part;GO:0043227//membrane-bounded organelle;GO:0043229//intracellular organelle;GO:0005634//nucleus;GO:0043231//intracellular membrane-bounded organelle;GO:0043226//organelle;GO:0044424//intracellular part;GO:0005622//intracellular;GO:0005623//cell	GO:0001071//nucleic acid binding transcription factor activity;GO:0046983//protein dimerization activity;GO:0003700//sequence-specific DNA binding transcription factor activity;GO:0005488//binding;GO:0005515//protein binding	GO:0071704//organic substance metabolic process;GO:0006351//transcription, DNA-templated;GO:0071495//cellular response to endogenous stimulus;GO:0050896//response to stimulus;GO:0009725//response to hormone;GO:0009416//response to light stimulus;GO:0051252//regulation of RNA metabolic process;GO:0009058//biosynthetic process;GO:0010114//response to red light;GO:0032774//RNA biosynthetic process;G…
Gh_A07G1200	0.35	0.11	0.26	0.37	0.1	0.37	0.22	0.63	0	0	0	0	0	0	0	0.24	0	0.52	3	1	2	3	1	3	2	4.57	0	0	0	0	0	0	0	2	0	4	Gh_A07G1200	Gh_A07G1200	Auxin-responsive protein IAA30 [Source:UniProtKB/Swiss-Prot;Acc:Q9M1R4]	Environmental Information Processing	Signal transduction	ko04075//Plant hormone signal transduction	GO:0005623//cell;GO:0043226//organelle;GO:0043229//intracellular organelle;GO:0043231//intracellular membrane-bounded organelle;GO:0044464//cell part;GO:0005622//intracellular;GO:0005634//nucleus;GO:0043227//membrane-bounded organelle;GO:0044424//intracellular part	GO:0046983//protein dimerization activity;GO:0003700//sequence-specific DNA binding transcription factor activity;GO:0005515//protein binding;GO:0001071//nucleic acid binding transcription factor activity;GO:0005488//binding	GO:0010468//regulation of gene expression;GO:0009755//hormone-mediated signaling pathway;GO:0034645//cellular macromolecule biosynthetic process;GO:0044699//single-organism process;GO:0019438//aromatic compound biosynthetic process;GO:0046483//heterocycle metabolic process;GO:0010556//regulation of macromolecule biosynthetic process;GO:0010033//response to organic substance;GO:1901360//organic cy…
Gh_A07G1428	9.85	15.44	11.43	15.14	14.15	12.24	16.08	18.55	17.21	7.35	7.34	7.79	9.72	12.27	10.66	14.02	12.22	17.4	156	252	162.76	224.79	269	186	273	250.26	249	120	95	119	178.82	167	132	215	188.73	250	Gh_A07G1428	Gh_A07G1428	Auxin-responsive protein IAA11 [Source:UniProtKB/Swiss-Prot;Acc:Q38829]	Environmental Information Processing	Signal transduction	ko04075//Plant hormone signal transduction	GO:0043227//membrane-bounded organelle;GO:0005622//intracellular;GO:0030054//cell junction;GO:0055044//symplast;GO:0043229//intracellular organelle;GO:0043226//organelle;GO:0005634//nucleus;GO:0044464//cell part;GO:0044424//intracellular part;GO:0009506//plasmodesma;GO:0043231//intracellular membrane-bounded organelle;GO:0005911//cell-cell junction;GO:0005623//cell	GO:0003700//sequence-specific DNA binding transcription factor activity;GO:0005515//protein binding;GO:0001071//nucleic acid binding transcription factor activity;GO:0046983//protein dimerization activity;GO:0005488//binding	GO:0044237//cellular metabolic process;GO:0009733//response to auxin;GO:0070887//cellular response to chemical stimulus;GO:0009987//cellular process;GO:0031326//regulation of cellular biosynthetic process;GO:0071495//cellular response to endogenous stimulus;GO:0051171//regulation of nitrogen compound metabolic process;GO:0097659//nucleic acid-templated transcription;GO:0009734//auxin-activated si…
Gh_A07G2154	17.25	31.79	25.51	31.62	27.97	32.95	20.27	20.51	19.77	13.41	4.31	8.62	15.79	25.32	11.11	24.35	15.72	16.81	185.44	352.04	246.46	318.57	360.7	339.9	233.52	187.79	194.07	148.56	37.86	89.37	197.13	233.89	93.38	253.32	164.79	163.92	Gh_A07G2154	Gh_A07G2154	Auxin-responsive protein IAA4 [Source:UniProtKB/Swiss-Prot;Acc:P33077]	Environmental Information Processing	Signal transduction	ko04075//Plant hormone signal transduction	GO:0005622//intracellular;GO:0043231//intracellular membrane-bounded organelle;GO:0044424//intracellular part;GO:0044464//cell part;GO:0043226//organelle;GO:0043229//intracellular organelle;GO:0005623//cell;GO:0043227//membrane-bounded organelle;GO:0005634//nucleus	GO:0001071//nucleic acid binding transcription factor activity;GO:0003700//sequence-specific DNA binding transcription factor activity;GO:0044212//transcription regulatory region DNA binding;GO:0005488//binding;GO:0001067//regulatory region nucleic acid binding;GO:1901363//heterocyclic compound binding;GO:0003677//DNA binding;GO:0005515//protein binding;GO:0046983//protein dimerization activity;G…	GO:0010467//gene expression;GO:0044700//single organism signaling;GO:0016070//RNA metabolic process;GO:0006139//nucleobase-containing compound metabolic process;GO:1901362//organic cyclic compound biosynthetic process;GO:0009733//response to auxin;GO:0009059//macromolecule biosynthetic process;GO:0071310//cellular response to organic substance;GO:1901360//organic cyclic compound metabolic process…
Gh_A08G0762	0	0	0	0	0	0	0	0	0	0	0	0	0	0	0	0	0	0	0	0	0	0	0	0	0	0	0	0	0	0	0	0	0	0	0	0	Gh_A08G0762	Gh_A08G0762	Auxin-responsive protein IAA29 [Source:UniProtKB/Swiss-Prot;Acc:Q93WC4]	Environmental Information Processing	Signal transduction	ko04075//Plant hormone signal transduction	GO:0044464//cell part;GO:0043227//membrane-bounded organelle;GO:0043229//intracellular organelle;GO:0005634//nucleus;GO:0043231//intracellular membrane-bounded organelle;GO:0043226//organelle;GO:0044424//intracellular part;GO:0005622//intracellular;GO:0005623//cell	GO:0001071//nucleic acid binding transcription factor activity;GO:0046983//protein dimerization activity;GO:0003700//sequence-specific DNA binding transcription factor activity;GO:0005488//binding;GO:0005515//protein binding	GO:0071704//organic substance metabolic process;GO:0006351//transcription, DNA-templated;GO:0071495//cellular response to endogenous stimulus;GO:0050896//response to stimulus;GO:0009725//response to hormone;GO:0009416//response to light stimulus;GO:0051252//regulation of RNA metabolic process;GO:0009058//biosynthetic process;GO:0010114//response to red light;GO:0032774//RNA biosynthetic process;G…
Gh_A08G1074	0.44	0.61	0.4	0.27	0.37	0.5	0.95	0.57	0	0.77	0.41	0.58	0	0.14	0	0.36	0.11	0	4.13	5.85	3.38	2.33	4.19	4.47	9.56	4.51	0	7.45	3.13	5.28	0	1.16	0	3.22	1.03	0	Gh_A08G1074	Gh_A08G1074	Auxin-responsive protein IAA20 [Source:UniProtKB/Swiss-Prot;Acc:O24410]	Environmental Information Processing	Signal transduction	ko04075//Plant hormone signal transduction	GO:0043229//intracellular organelle;GO:0005622//intracellular;GO:0043227//membrane-bounded organelle;GO:0005623//cell;GO:0005634//nucleus;GO:0043231//intracellular membrane-bounded organelle;GO:0044464//cell part;GO:0043226//organelle;GO:0044424//intracellular part	GO:0046983//protein dimerization activity;GO:0001071//nucleic acid binding transcription factor activity;GO:0005515//protein binding;GO:0005488//binding;GO:0003700//sequence-specific DNA binding transcription factor activity	GO:0009416//response to light stimulus;GO:0044249//cellular biosynthetic process;GO:1901362//organic cyclic compound biosynthetic process;GO:0044702//single organism reproductive process;GO:0031323//regulation of cellular metabolic process;GO:0009733//response to auxin;GO:0010154//fruit development;GO:0048598//embryonic morphogenesis;GO:0032774//RNA biosynthetic process;GO:0010588//cotyledon vasc…
Gh_A08G1702	21.9	19.65	19.8	20.91	29.4	20.33	21.23	22.29	27.06	21.63	19.67	23.69	28.35	33.27	28.25	23.62	28.12	26.43	345.78	319.66	281	309.5	557	308	359.26	299.8	390.23	352	253.79	361	520	451.54	348.75	360.97	432.96	378.46	Gh_A08G1702	Gh_A08G1702	Auxin-responsive protein IAA11 [Source:UniProtKB/Swiss-Prot;Acc:Q38829]	Environmental Information Processing	Signal transduction	ko04075//Plant hormone signal transduction	GO:0043227//membrane-bounded organelle;GO:0005622//intracellular;GO:0030054//cell junction;GO:0055044//symplast;GO:0043229//intracellular organelle;GO:0043226//organelle;GO:0005634//nucleus;GO:0044464//cell part;GO:0044424//intracellular part;GO:0009506//plasmodesma;GO:0043231//intracellular membrane-bounded organelle;GO:0005911//cell-cell junction;GO:0005623//cell	GO:0003700//sequence-specific DNA binding transcription factor activity;GO:0005515//protein binding;GO:0001071//nucleic acid binding transcription factor activity;GO:0046983//protein dimerization activity;GO:0005488//binding	GO:0044237//cellular metabolic process;GO:0009733//response to auxin;GO:0070887//cellular response to chemical stimulus;GO:0009987//cellular process;GO:0031326//regulation of cellular biosynthetic process;GO:0071495//cellular response to endogenous stimulus;GO:0051171//regulation of nitrogen compound metabolic process;GO:0097659//nucleic acid-templated transcription;GO:0009734//auxin-activated si…
Gh_A08G2136	5.32	5.76	7.24	4.91	7.51	6.87	9.08	9.12	6.82	4.89	4.54	7.98	7.37	7.75	11	3.07	7.11	4.86	59.07	65.91	72.25	51.11	100.11	73.19	108.14	86.34	69.2	56	41.21	85.5	95.09	74	95.57	33.05	77.07	49	Gh_A08G2136	Gh_A08G2136	Auxin-responsive protein IAA16 [Source:UniProtKB/Swiss-Prot;Acc:O24407]	Environmental Information Processing	Signal transduction	ko04075//Plant hormone signal transduction	GO:0043229//intracellular organelle;GO:0044464//cell part;GO:0005634//nucleus;GO:0043226//organelle;GO:0005622//intracellular;GO:0043227//membrane-bounded organelle;GO:0005623//cell;GO:0044424//intracellular part;GO:0043231//intracellular membrane-bounded organelle	GO:0046983//protein dimerization activity;GO:0001071//nucleic acid binding transcription factor activity;GO:0005488//binding;GO:0005515//protein binding;GO:0003700//sequence-specific DNA binding transcription factor activity	GO:1901362//organic cyclic compound biosynthetic process;GO:0006725//cellular aromatic compound metabolic process;GO:0080090//regulation of primary metabolic process;GO:0007154//cell communication;GO:0031323//regulation of cellular metabolic process;GO:0090304//nucleic acid metabolic process;GO:0071365//cellular response to auxin stimulus;GO:0044238//primary metabolic process;GO:0071495//cellular…
Gh_A08G2485	18.26	49.98	21.07	38.44	39.75	64.42	25.82	25.78	24.5	1.79	2.39	1.1	7.02	5.8	7.55	41.88	14.36	16.75	188.79	532.22	195.76	372.49	493.09	639.11	286.06	226.98	231.31	19.12	20.22	11	84.35	51.53	61	419.06	144.77	157.03	Gh_A08G2485	Gh_A08G2485	Auxin-responsive protein IAA4 [Source:UniProtKB/Swiss-Prot;Acc:P33077]	Environmental Information Processing	Signal transduction	ko04075//Plant hormone signal transduction	GO:0005622//intracellular;GO:0043231//intracellular membrane-bounded organelle;GO:0044424//intracellular part;GO:0044464//cell part;GO:0043226//organelle;GO:0043229//intracellular organelle;GO:0005623//cell;GO:0043227//membrane-bounded organelle;GO:0005634//nucleus	GO:0001071//nucleic acid binding transcription factor activity;GO:0003700//sequence-specific DNA binding transcription factor activity;GO:0044212//transcription regulatory region DNA binding;GO:0005488//binding;GO:0001067//regulatory region nucleic acid binding;GO:1901363//heterocyclic compound binding;GO:0003677//DNA binding;GO:0005515//protein binding;GO:0046983//protein dimerization activity;G…	GO:0010467//gene expression;GO:0044700//single organism signaling;GO:0016070//RNA metabolic process;GO:0006139//nucleobase-containing compound metabolic process;GO:1901362//organic cyclic compound biosynthetic process;GO:0009733//response to auxin;GO:0009059//macromolecule biosynthetic process;GO:0071310//cellular response to organic substance;GO:1901360//organic cyclic compound metabolic process…
Gh_A09G1945	6.52	4.8	6.78	14.24	7.41	4.6	5.1	5.8	7.48	3.87	3.99	4.47	10.46	6.11	6.32	4.56	9.16	10.08	62	47	58	127	84.56	42	52.03	47	65	38	31	41	115.64	50	47	42	85	87	Gh_A09G1945	Gh_A09G1945	Auxin-responsive protein IAA4 [Source:UniProtKB/Swiss-Prot;Acc:P33077]	Environmental Information Processing	Signal transduction	ko04075//Plant hormone signal transduction	GO:0005622//intracellular;GO:0043231//intracellular membrane-bounded organelle;GO:0044424//intracellular part;GO:0044464//cell part;GO:0043226//organelle;GO:0043229//intracellular organelle;GO:0005623//cell;GO:0043227//membrane-bounded organelle;GO:0005634//nucleus	GO:0001071//nucleic acid binding transcription factor activity;GO:0003700//sequence-specific DNA binding transcription factor activity;GO:0044212//transcription regulatory region DNA binding;GO:0005488//binding;GO:0001067//regulatory region nucleic acid binding;GO:1901363//heterocyclic compound binding;GO:0003677//DNA binding;GO:0005515//protein binding;GO:0046983//protein dimerization activity;G…	GO:0010467//gene expression;GO:0044700//single organism signaling;GO:0016070//RNA metabolic process;GO:0006139//nucleobase-containing compound metabolic process;GO:1901362//organic cyclic compound biosynthetic process;GO:0009733//response to auxin;GO:0009059//macromolecule biosynthetic process;GO:0071310//cellular response to organic substance;GO:1901360//organic cyclic compound metabolic process…
Gh_A09G1946	0	0	0	0	0	0	0	0	0	0	0	0	0	0	0	0	0	0	0	0	0	0	0	0	0	0	0	0	0	0	0	0	0	0	0	0	Gh_A09G1946	Gh_A09G1946	Auxin-responsive protein IAA4 [Source:UniProtKB/Swiss-Prot;Acc:P33077]	Environmental Information Processing	Signal transduction	ko04075//Plant hormone signal transduction	GO:0005622//intracellular;GO:0043231//intracellular membrane-bounded organelle;GO:0044424//intracellular part;GO:0044464//cell part;GO:0043226//organelle;GO:0043229//intracellular organelle;GO:0005623//cell;GO:0043227//membrane-bounded organelle;GO:0005634//nucleus	GO:0001071//nucleic acid binding transcription factor activity;GO:0003700//sequence-specific DNA binding transcription factor activity;GO:0044212//transcription regulatory region DNA binding;GO:0005488//binding;GO:0001067//regulatory region nucleic acid binding;GO:1901363//heterocyclic compound binding;GO:0003677//DNA binding;GO:0005515//protein binding;GO:0046983//protein dimerization activity;G…	GO:0010467//gene expression;GO:0044700//single organism signaling;GO:0016070//RNA metabolic process;GO:0006139//nucleobase-containing compound metabolic process;GO:1901362//organic cyclic compound biosynthetic process;GO:0009733//response to auxin;GO:0009059//macromolecule biosynthetic process;GO:0071310//cellular response to organic substance;GO:1901360//organic cyclic compound metabolic process…
Gh_A09G1947	171.08	170.48	137.18	201.82	214.59	225.28	240.96	236.06	229.38	109.23	98.86	111.62	150.03	140.17	130.15	126.61	209.88	198.4	2146.76	2203.81	1547.18	2374.07	3231.15	2712.99	3240.29	2523.22	2628.59	1412.77	1013.78	1351.63	2186.95	1511.77	1277.12	1537.78	2568.41	2257.94	Gh_A09G1947	Gh_A09G1947	Auxin-responsive protein IAA14 [Source:UniProtKB/Swiss-Prot;Acc:Q38832]	Environmental Information Processing	Signal transduction	ko04075//Plant hormone signal transduction	GO:0005634//nucleus;GO:0044424//intracellular part;GO:0043227//membrane-bounded organelle;GO:0044464//cell part;GO:0005623//cell;GO:0005622//intracellular;GO:0043231//intracellular membrane-bounded organelle;GO:0043229//intracellular organelle;GO:0043226//organelle	GO:0005515//protein binding;GO:0001071//nucleic acid binding transcription factor activity;GO:0003700//sequence-specific DNA binding transcription factor activity;GO:0005488//binding;GO:0046983//protein dimerization activity	GO:0010033//response to organic substance;GO:0046483//heterocycle metabolic process;GO:0032774//RNA biosynthetic process;GO:1903507//negative regulation of nucleic acid-templated transcription;GO:0006807//nitrogen compound metabolic process;GO:0007154//cell communication;GO:0070887//cellular response to chemical stimulus;GO:0007275//multicellular organismal development;GO:0031326//regulation of c…
Gh_A09G1997	15.98	18.15	15.81	19.12	17.85	14.03	12.05	13.22	15.41	23.61	24.29	20.15	24.59	32.19	31.65	22.17	29.33	31.33	235	275	209	263.59	315	198	190	165.59	207	358	292	286	420.13	407	364	315.55	420.64	418	Gh_A09G1997	Gh_A09G1997	Auxin-responsive protein IAA13 [Source:UniProtKB/Swiss-Prot;Acc:Q38831]	Environmental Information Processing	Signal transduction	ko04075//Plant hormone signal transduction	GO:0043231//intracellular membrane-bounded organelle;GO:0043227//membrane-bounded organelle;GO:0044464//cell part;GO:0005623//cell;GO:0043229//intracellular organelle;GO:0043226//organelle;GO:0044424//intracellular part;GO:0005622//intracellular;GO:0005634//nucleus	GO:0001071//nucleic acid binding transcription factor activity;GO:0003700//sequence-specific DNA binding transcription factor activity;GO:0005488//binding;GO:0046983//protein dimerization activity;GO:0005515//protein binding	GO:0071495//cellular response to endogenous stimulus;GO:0050794//regulation of cellular process;GO:0009725//response to hormone;GO:0010467//gene expression;GO:0050896//response to stimulus;GO:0044249//cellular biosynthetic process;GO:2001141//regulation of RNA biosynthetic process;GO:0010033//response to organic substance;GO:0006139//nucleobase-containing compound metabolic process;GO:0051252//re…
Gh_A10G0575	119.33	109.78	79.32	90.6	103.81	111.66	143.83	144.15	136.19	71.41	66.71	80.1	52.81	52.75	47.69	39.66	53.26	54.68	2092.59	1983.17	1250.29	1489.45	2184.46	1879.35	2703.06	2153.39	2181.04	1290.82	956.09	1355.48	1075.74	795.11	653.97	673.23	910.79	869.77	Gh_A10G0575	Gh_A10G0575	Auxin-responsive protein IAA26 [Source:UniProtKB/Swiss-Prot;Acc:Q8LAL2]	Environmental Information Processing	Signal transduction	ko04075//Plant hormone signal transduction	GO:0044464//cell part;GO:0043231//intracellular membrane-bounded organelle;GO:0044424//intracellular part;GO:0005634//nucleus;GO:0043226//organelle;GO:0043227//membrane-bounded organelle;GO:0043229//intracellular organelle;GO:0005623//cell;GO:0005622//intracellular	GO:0005488//binding;GO:0003700//sequence-specific DNA binding transcription factor activity;GO:0005515//protein binding;GO:0001071//nucleic acid binding transcription factor activity;GO:0046983//protein dimerization activity	GO:0070887//cellular response to chemical stimulus;GO:1901360//organic cyclic compound metabolic process;GO:0019219//regulation of nucleobase-containing compound metabolic process;GO:0046483//heterocycle metabolic process;GO:0044238//primary metabolic process;GO:0071310//cellular response to organic substance;GO:0006351//transcription, DNA-templated;GO:0009725//response to hormone;GO:0009734//aux…
Gh_A10G0596	0.43	0.21	1.44	0.31	0.3	1.88	0.07	0.34	0.08	0.63	0.18	0.75	0.37	0.25	0.18	0	0	0.08	6	3	18	4	5	25	1	4	1	9	2	10	6	3	2	0	0	1	Gh_A10G0596	Gh_A10G0596	Auxin-responsive protein IAA8 [Source:UniProtKB/Swiss-Prot;Acc:Q38826]	Environmental Information Processing	Signal transduction	ko04075//Plant hormone signal transduction	GO:0043229//intracellular organelle;GO:0005622//intracellular;GO:0005623//cell;GO:0044464//cell part;GO:0043226//organelle;GO:0043231//intracellular membrane-bounded organelle;GO:0043227//membrane-bounded organelle;GO:0044424//intracellular part;GO:0005634//nucleus	GO:0005515//protein binding;GO:0046983//protein dimerization activity;GO:0005488//binding	GO:2001141//regulation of RNA biosynthetic process;GO:0043170//macromolecule metabolic process;GO:0019219//regulation of nucleobase-containing compound metabolic process;GO:0080090//regulation of primary metabolic process;GO:0044238//primary metabolic process;GO:0044700//single organism signaling;GO:0019222//regulation of metabolic process;GO:0010033//response to organic substance;GO:0019438//aro…
Gh_A10G0797	21.4	21.02	23.19	15.26	13.43	13.07	8.89	12.6	9.63	14.85	15.45	14.11	8.62	7.21	6.37	9.28	6.86	5.59	388.43	393.02	378.46	259.75	292.61	227.74	173.04	194.91	159.73	277.87	229.28	247.22	181.85	112.45	90.47	163.01	121.37	92.02	Gh_A10G0797	Gh_A10G0797	Auxin-responsive protein IAA9 [Source:UniProtKB/Swiss-Prot;Acc:Q38827]	Environmental Information Processing	Signal transduction	ko04075//Plant hormone signal transduction	GO:0043227//membrane-bounded organelle;GO:0044464//cell part;GO:0043231//intracellular membrane-bounded organelle;GO:0043226//organelle;GO:0043229//intracellular organelle;GO:0005622//intracellular;GO:0005634//nucleus;GO:0005623//cell;GO:0044424//intracellular part	GO:0005488//binding;GO:0001071//nucleic acid binding transcription factor activity;GO:0005515//protein binding;GO:0046983//protein dimerization activity;GO:0003700//sequence-specific DNA binding transcription factor activity	GO:0010467//gene expression;GO:0090304//nucleic acid metabolic process;GO:0050896//response to stimulus;GO:0065007//biological regulation;GO:0044763//single-organism cellular process;GO:0006807//nitrogen compound metabolic process;GO:0009889//regulation of biosynthetic process;GO:1903506//regulation of nucleic acid-templated transcription;GO:0006725//cellular aromatic compound metabolic process;G…
Gh_A10G1020	2.32	3	3.2	7.19	3.31	3.24	2.06	2.94	1.51	3.86	4.33	2.75	5.52	4.88	5.79	5.02	4.19	5.85	21	28	26	61	36	28.15	20	22.63	12.49	36	32	24	58	38	41	44	37	48	Gh_A10G1020	Gh_A10G1020	Auxin-responsive protein IAA4 [Source:UniProtKB/Swiss-Prot;Acc:P33077]	Environmental Information Processing	Signal transduction	ko04075//Plant hormone signal transduction	GO:0005622//intracellular;GO:0043231//intracellular membrane-bounded organelle;GO:0044424//intracellular part;GO:0044464//cell part;GO:0043226//organelle;GO:0043229//intracellular organelle;GO:0005623//cell;GO:0043227//membrane-bounded organelle;GO:0005634//nucleus	GO:0001071//nucleic acid binding transcription factor activity;GO:0003700//sequence-specific DNA binding transcription factor activity;GO:0044212//transcription regulatory region DNA binding;GO:0005488//binding;GO:0001067//regulatory region nucleic acid binding;GO:1901363//heterocyclic compound binding;GO:0003677//DNA binding;GO:0005515//protein binding;GO:0046983//protein dimerization activity;G…	GO:0010467//gene expression;GO:0044700//single organism signaling;GO:0016070//RNA metabolic process;GO:0006139//nucleobase-containing compound metabolic process;GO:1901362//organic cyclic compound biosynthetic process;GO:0009733//response to auxin;GO:0009059//macromolecule biosynthetic process;GO:0071310//cellular response to organic substance;GO:1901360//organic cyclic compound metabolic process…
Gh_A11G0956	0.23	0.33	0.46	0.29	0.09	0.36	0.32	0	0	0.89	0.61	0.12	0.29	0.79	0.44	0.12	0.44	0.13	2	3	3.6	2.36	1	3	3	0	0	8.11	4.4	1	3	6	3	1	3.75	1	Gh_A11G0956	Gh_A11G0956	Auxin-responsive protein IAA30 [Source:UniProtKB/Swiss-Prot;Acc:Q9M1R4]	Environmental Information Processing	Signal transduction	ko04075//Plant hormone signal transduction	GO:0005623//cell;GO:0043226//organelle;GO:0043229//intracellular organelle;GO:0043231//intracellular membrane-bounded organelle;GO:0044464//cell part;GO:0005622//intracellular;GO:0005634//nucleus;GO:0043227//membrane-bounded organelle;GO:0044424//intracellular part	GO:0046983//protein dimerization activity;GO:0003700//sequence-specific DNA binding transcription factor activity;GO:0005515//protein binding;GO:0001071//nucleic acid binding transcription factor activity;GO:0005488//binding	GO:0010468//regulation of gene expression;GO:0009755//hormone-mediated signaling pathway;GO:0034645//cellular macromolecule biosynthetic process;GO:0044699//single-organism process;GO:0019438//aromatic compound biosynthetic process;GO:0046483//heterocycle metabolic process;GO:0010556//regulation of macromolecule biosynthetic process;GO:0010033//response to organic substance;GO:1901360//organic cy…
Gh_A11G1164	71.18	78.55	67.6	164.31	141.9	133.84	129.1	159.7	158.4	64.04	79.84	73.56	209.83	163.38	171.6	219.64	255.83	245.64	863.85	982.1	737.41	1869.45	2066.59	1558.99	1679.12	1651.12	1755.64	801.11	791.91	861.54	2958.4	1704.37	1628.65	2580.17	3028.01	2703.99	Gh_A11G1164	Gh_A11G1164	Auxin-responsive protein IAA16 [Source:UniProtKB/Swiss-Prot;Acc:O24407]	Environmental Information Processing	Signal transduction	ko04075//Plant hormone signal transduction	GO:0043229//intracellular organelle;GO:0044464//cell part;GO:0005634//nucleus;GO:0043226//organelle;GO:0005622//intracellular;GO:0043227//membrane-bounded organelle;GO:0005623//cell;GO:0044424//intracellular part;GO:0043231//intracellular membrane-bounded organelle	GO:0046983//protein dimerization activity;GO:0001071//nucleic acid binding transcription factor activity;GO:0005488//binding;GO:0005515//protein binding;GO:0003700//sequence-specific DNA binding transcription factor activity	GO:1901362//organic cyclic compound biosynthetic process;GO:0006725//cellular aromatic compound metabolic process;GO:0080090//regulation of primary metabolic process;GO:0007154//cell communication;GO:0031323//regulation of cellular metabolic process;GO:0090304//nucleic acid metabolic process;GO:0071365//cellular response to auxin stimulus;GO:0044238//primary metabolic process;GO:0071495//cellular…
Gh_A11G1231	15.68	13.62	12.65	15.24	21.7	17.9	14.58	17.08	15.78	7.16	11.47	8.73	10.06	7.71	5.75	13.74	17.47	13.59	247.63	221.54	179.53	225.52	411.15	271.22	246.7	229.71	227.51	116.55	148	133	184.49	104.58	71	210	269	194.64	Gh_A11G1231	Gh_A11G1231	Auxin-responsive protein IAA11 [Source:UniProtKB/Swiss-Prot;Acc:Q38829]	Environmental Information Processing	Signal transduction	ko04075//Plant hormone signal transduction	GO:0043227//membrane-bounded organelle;GO:0005622//intracellular;GO:0030054//cell junction;GO:0055044//symplast;GO:0043229//intracellular organelle;GO:0043226//organelle;GO:0005634//nucleus;GO:0044464//cell part;GO:0044424//intracellular part;GO:0009506//plasmodesma;GO:0043231//intracellular membrane-bounded organelle;GO:0005911//cell-cell junction;GO:0005623//cell	GO:0003700//sequence-specific DNA binding transcription factor activity;GO:0005515//protein binding;GO:0001071//nucleic acid binding transcription factor activity;GO:0046983//protein dimerization activity;GO:0005488//binding	GO:0044237//cellular metabolic process;GO:0009733//response to auxin;GO:0070887//cellular response to chemical stimulus;GO:0009987//cellular process;GO:0031326//regulation of cellular biosynthetic process;GO:0071495//cellular response to endogenous stimulus;GO:0051171//regulation of nitrogen compound metabolic process;GO:0097659//nucleic acid-templated transcription;GO:0009734//auxin-activated si…
Gh_A11G2241	67.89	51.25	50.14	82.04	66.7	53.34	52.1	63.39	76.79	83.34	77.11	76.72	69.76	90.28	97.04	82.03	87.91	87.37	848.38	659.84	563.16	961.16	1000.29	639.69	697.67	674.83	876.38	1073.45	787.5	925.13	1012.71	969.66	948.32	992.25	1071.38	990.28	Gh_A11G2241	Gh_A11G2241	Auxin-responsive protein IAA16 [Source:UniProtKB/Swiss-Prot;Acc:O24407]	Environmental Information Processing	Signal transduction	ko04075//Plant hormone signal transduction	GO:0043229//intracellular organelle;GO:0044464//cell part;GO:0005634//nucleus;GO:0043226//organelle;GO:0005622//intracellular;GO:0043227//membrane-bounded organelle;GO:0005623//cell;GO:0044424//intracellular part;GO:0043231//intracellular membrane-bounded organelle	GO:0046983//protein dimerization activity;GO:0001071//nucleic acid binding transcription factor activity;GO:0005488//binding;GO:0005515//protein binding;GO:0003700//sequence-specific DNA binding transcription factor activity	GO:1901362//organic cyclic compound biosynthetic process;GO:0006725//cellular aromatic compound metabolic process;GO:0080090//regulation of primary metabolic process;GO:0007154//cell communication;GO:0031323//regulation of cellular metabolic process;GO:0090304//nucleic acid metabolic process;GO:0071365//cellular response to auxin stimulus;GO:0044238//primary metabolic process;GO:0071495//cellular…
Gh_A11G2242	10.36	7.13	7.76	21.64	6.69	7.27	4.04	10.92	10.99	3.9	5.17	4.6	9.55	7.01	10.41	9.06	17.23	17.01	98	69.47	66	192	76	66	41	88	95	38	40	42	105	57	77	83	159	146	Gh_A11G2242	Gh_A11G2242	Auxin-responsive protein IAA4 [Source:UniProtKB/Swiss-Prot;Acc:P33077]	Environmental Information Processing	Signal transduction	ko04075//Plant hormone signal transduction	GO:0005622//intracellular;GO:0043231//intracellular membrane-bounded organelle;GO:0044424//intracellular part;GO:0044464//cell part;GO:0043226//organelle;GO:0043229//intracellular organelle;GO:0005623//cell;GO:0043227//membrane-bounded organelle;GO:0005634//nucleus	GO:0001071//nucleic acid binding transcription factor activity;GO:0003700//sequence-specific DNA binding transcription factor activity;GO:0044212//transcription regulatory region DNA binding;GO:0005488//binding;GO:0001067//regulatory region nucleic acid binding;GO:1901363//heterocyclic compound binding;GO:0003677//DNA binding;GO:0005515//protein binding;GO:0046983//protein dimerization activity;G…	GO:0010467//gene expression;GO:0044700//single organism signaling;GO:0016070//RNA metabolic process;GO:0006139//nucleobase-containing compound metabolic process;GO:1901362//organic cyclic compound biosynthetic process;GO:0009733//response to auxin;GO:0009059//macromolecule biosynthetic process;GO:0071310//cellular response to organic substance;GO:1901360//organic cyclic compound metabolic process…
Gh_A12G1083	0.09	0.17	0.3	0.1	0.3	0.19	0	0	0	0	0.33	0.28	0.15	0.31	0	0	0.46	0.2	1	2	3	1	4	2	0	0	0	0	3	3	2	3	0	0	5	2	Gh_A12G1083	Gh_A12G1083	Auxin-responsive protein IAA30 [Source:UniProtKB/Swiss-Prot;Acc:Q9M1R4]	Environmental Information Processing	Signal transduction	ko04075//Plant hormone signal transduction	GO:0005623//cell;GO:0043226//organelle;GO:0043229//intracellular organelle;GO:0043231//intracellular membrane-bounded organelle;GO:0044464//cell part;GO:0005622//intracellular;GO:0005634//nucleus;GO:0043227//membrane-bounded organelle;GO:0044424//intracellular part	GO:0046983//protein dimerization activity;GO:0003700//sequence-specific DNA binding transcription factor activity;GO:0005515//protein binding;GO:0001071//nucleic acid binding transcription factor activity;GO:0005488//binding	GO:0010468//regulation of gene expression;GO:0009755//hormone-mediated signaling pathway;GO:0034645//cellular macromolecule biosynthetic process;GO:0044699//single-organism process;GO:0019438//aromatic compound biosynthetic process;GO:0046483//heterocycle metabolic process;GO:0010556//regulation of macromolecule biosynthetic process;GO:0010033//response to organic substance;GO:1901360//organic cy…
Gh_A13G1489	172.09	171.64	153.2	189.72	184.68	174.97	185.67	180.4	191.1	183.46	162.27	183.15	189.18	241.92	239.26	189.19	214.89	179.27	2186	2246.06	1749.12	2259.24	2815	2133.05	2527.49	1952.04	2216.85	2402	1684.58	2245	2791.56	2641.22	2376.68	2326	2662	2065.37	Gh_A13G1489	Gh_A13G1489	Auxin-responsive protein IAA16 [Source:UniProtKB/Swiss-Prot;Acc:O24407]	Environmental Information Processing	Signal transduction	ko04075//Plant hormone signal transduction	GO:0043229//intracellular organelle;GO:0044464//cell part;GO:0005634//nucleus;GO:0043226//organelle;GO:0005622//intracellular;GO:0043227//membrane-bounded organelle;GO:0005623//cell;GO:0044424//intracellular part;GO:0043231//intracellular membrane-bounded organelle	GO:0046983//protein dimerization activity;GO:0001071//nucleic acid binding transcription factor activity;GO:0005488//binding;GO:0005515//protein binding;GO:0003700//sequence-specific DNA binding transcription factor activity	GO:1901362//organic cyclic compound biosynthetic process;GO:0006725//cellular aromatic compound metabolic process;GO:0080090//regulation of primary metabolic process;GO:0007154//cell communication;GO:0031323//regulation of cellular metabolic process;GO:0090304//nucleic acid metabolic process;GO:0071365//cellular response to auxin stimulus;GO:0044238//primary metabolic process;GO:0071495//cellular…
Gh_A13G1490	99.91	93.19	94.01	123.04	106.22	87.09	88.35	106.85	95.43	103.02	82.22	97.38	78.19	109.56	91.65	62.48	101.16	84.95	981.32	943	830	1133	1252	821	930	894	856	1043	660	923	892.2	925	704	594	969	756.79	Gh_A13G1490	Gh_A13G1490	Auxin-responsive protein IAA4 [Source:UniProtKB/Swiss-Prot;Acc:P33077]	Environmental Information Processing	Signal transduction	ko04075//Plant hormone signal transduction	GO:0005622//intracellular;GO:0043231//intracellular membrane-bounded organelle;GO:0044424//intracellular part;GO:0044464//cell part;GO:0043226//organelle;GO:0043229//intracellular organelle;GO:0005623//cell;GO:0043227//membrane-bounded organelle;GO:0005634//nucleus	GO:0001071//nucleic acid binding transcription factor activity;GO:0003700//sequence-specific DNA binding transcription factor activity;GO:0044212//transcription regulatory region DNA binding;GO:0005488//binding;GO:0001067//regulatory region nucleic acid binding;GO:1901363//heterocyclic compound binding;GO:0003677//DNA binding;GO:0005515//protein binding;GO:0046983//protein dimerization activity;G…	GO:0010467//gene expression;GO:0044700//single organism signaling;GO:0016070//RNA metabolic process;GO:0006139//nucleobase-containing compound metabolic process;GO:1901362//organic cyclic compound biosynthetic process;GO:0009733//response to auxin;GO:0009059//macromolecule biosynthetic process;GO:0071310//cellular response to organic substance;GO:1901360//organic cyclic compound metabolic process…
Gh_D02G0405	10.38	10.08	10.76	10.64	13.15	11.77	12.35	10.04	13.27	13.43	9.47	11.82	9.46	8.65	11.33	11.57	10.49	9.59	102	102	95	98	155	111	130	84	119	136	76	112	108	73	87	109.97	100.46	85.46	Gh_D02G0405	Gh_D02G0405	Auxin-responsive protein IAA4 [Source:UniProtKB/Swiss-Prot;Acc:P33077]	Environmental Information Processing	Signal transduction	ko04075//Plant hormone signal transduction	GO:0005622//intracellular;GO:0043231//intracellular membrane-bounded organelle;GO:0044424//intracellular part;GO:0044464//cell part;GO:0043226//organelle;GO:0043229//intracellular organelle;GO:0005623//cell;GO:0043227//membrane-bounded organelle;GO:0005634//nucleus	GO:0001071//nucleic acid binding transcription factor activity;GO:0003700//sequence-specific DNA binding transcription factor activity;GO:0044212//transcription regulatory region DNA binding;GO:0005488//binding;GO:0001067//regulatory region nucleic acid binding;GO:1901363//heterocyclic compound binding;GO:0003677//DNA binding;GO:0005515//protein binding;GO:0046983//protein dimerization activity;G…	GO:0010467//gene expression;GO:0044700//single organism signaling;GO:0016070//RNA metabolic process;GO:0006139//nucleobase-containing compound metabolic process;GO:1901362//organic cyclic compound biosynthetic process;GO:0009733//response to auxin;GO:0009059//macromolecule biosynthetic process;GO:0071310//cellular response to organic substance;GO:1901360//organic cyclic compound metabolic process…
Gh_D02G2389	5.49	7.86	3.13	15.68	11.67	10.62	13	21.38	17.48	7.2	5.81	6.55	17.34	12.55	10.36	22.78	49.92	35.78	70.84	104.48	36.27	189.71	180.78	131.52	179.79	235.11	206.09	95.73	61.32	81.55	259.97	139.27	104.6	284.57	628.36	418.89	Gh_D02G2389	Gh_D02G2389	Auxin-responsive protein IAA14 [Source:UniProtKB/Swiss-Prot;Acc:Q38832]	Environmental Information Processing	Signal transduction	ko04075//Plant hormone signal transduction	GO:0005634//nucleus;GO:0044424//intracellular part;GO:0043227//membrane-bounded organelle;GO:0044464//cell part;GO:0005623//cell;GO:0005622//intracellular;GO:0043231//intracellular membrane-bounded organelle;GO:0043229//intracellular organelle;GO:0043226//organelle	GO:0005515//protein binding;GO:0001071//nucleic acid binding transcription factor activity;GO:0003700//sequence-specific DNA binding transcription factor activity;GO:0005488//binding;GO:0046983//protein dimerization activity	GO:0010033//response to organic substance;GO:0046483//heterocycle metabolic process;GO:0032774//RNA biosynthetic process;GO:1903507//negative regulation of nucleic acid-templated transcription;GO:0006807//nitrogen compound metabolic process;GO:0007154//cell communication;GO:0070887//cellular response to chemical stimulus;GO:0007275//multicellular organismal development;GO:0031326//regulation of c…
Gh_D03G0315	50.15	53.68	56.3	43.65	42.83	37.3	26.15	34.85	28.64	33.67	44.29	36.13	31.38	26.93	28.11	36.55	25.41	25.98	974.96	1075.09	983.73	795.45	999.1	695.93	544.77	577.05	508.43	674.64	703.63	677.79	708.56	449.9	427.38	687.7	481.75	457.99	Gh_D03G0315	Gh_D03G0315	Auxin-responsive protein IAA9 [Source:UniProtKB/Swiss-Prot;Acc:Q38827]	Environmental Information Processing	Signal transduction	ko04075//Plant hormone signal transduction	GO:0043227//membrane-bounded organelle;GO:0044464//cell part;GO:0043231//intracellular membrane-bounded organelle;GO:0043226//organelle;GO:0043229//intracellular organelle;GO:0005622//intracellular;GO:0005634//nucleus;GO:0005623//cell;GO:0044424//intracellular part	GO:0005488//binding;GO:0001071//nucleic acid binding transcription factor activity;GO:0005515//protein binding;GO:0046983//protein dimerization activity;GO:0003700//sequence-specific DNA binding transcription factor activity	GO:0010467//gene expression;GO:0090304//nucleic acid metabolic process;GO:0050896//response to stimulus;GO:0065007//biological regulation;GO:0044763//single-organism cellular process;GO:0006807//nitrogen compound metabolic process;GO:0009889//regulation of biosynthetic process;GO:1903506//regulation of nucleic acid-templated transcription;GO:0006725//cellular aromatic compound metabolic process;G…
Gh_D03G0585	10.41	9.25	9.04	9.15	11.38	10.92	9.78	10	11.6	11.36	10.01	9.64	10.85	17.86	16.05	11.41	11.15	11.06	185.77	169.99	144.98	153	243.73	186.96	187	152.05	189	208.98	146	166	225	274	223.99	197	194	179	Gh_D03G0585	Gh_D03G0585	Auxin-responsive protein IAA27 [Source:UniProtKB/Swiss-Prot;Acc:Q9ZSY8]	Environmental Information Processing	Signal transduction	ko04075//Plant hormone signal transduction	GO:0005622//intracellular;GO:0043227//membrane-bounded organelle;GO:0005623//cell;GO:0044424//intracellular part;GO:0043229//intracellular organelle;GO:0044464//cell part;GO:0043226//organelle;GO:0043231//intracellular membrane-bounded organelle;GO:0005634//nucleus	GO:0046983//protein dimerization activity;GO:0005515//protein binding;GO:0001071//nucleic acid binding transcription factor activity;GO:0005488//binding;GO:0003700//sequence-specific DNA binding transcription factor activity	GO:0006139//nucleobase-containing compound metabolic process;GO:2000112//regulation of cellular macromolecule biosynthetic process;GO:1901362//organic cyclic compound biosynthetic process;GO:0009734//auxin-activated signaling pathway;GO:0065007//biological regulation;GO:1901360//organic cyclic compound metabolic process;GO:0032870//cellular response to hormone stimulus;GO:0044249//cellular biosyn…
Gh_D05G0138	2.15	1.05	0.86	1.11	0.28	0.98	0.21	0.71	0.75	3.46	1.76	2.27	1.32	2.66	3.36	1.84	0.97	1.42	28.27	14.28	10.15	13.7	4.45	12.33	3	8	9	47	18.97	28.88	20.26	30.07	34.56	23.41	12.39	17	Gh_D05G0138	Gh_D05G0138	Auxin-responsive protein IAA29 [Source:UniProtKB/Swiss-Prot;Acc:Q93WC4]	Environmental Information Processing	Signal transduction	ko04075//Plant hormone signal transduction	GO:0044464//cell part;GO:0043227//membrane-bounded organelle;GO:0043229//intracellular organelle;GO:0005634//nucleus;GO:0043231//intracellular membrane-bounded organelle;GO:0043226//organelle;GO:0044424//intracellular part;GO:0005622//intracellular;GO:0005623//cell	GO:0001071//nucleic acid binding transcription factor activity;GO:0046983//protein dimerization activity;GO:0003700//sequence-specific DNA binding transcription factor activity;GO:0005488//binding;GO:0005515//protein binding	GO:0071704//organic substance metabolic process;GO:0006351//transcription, DNA-templated;GO:0071495//cellular response to endogenous stimulus;GO:0050896//response to stimulus;GO:0009725//response to hormone;GO:0009416//response to light stimulus;GO:0051252//regulation of RNA metabolic process;GO:0009058//biosynthetic process;GO:0010114//response to red light;GO:0032774//RNA biosynthetic process;G…
Gh_D05G0249	63.49	71.41	61.37	66.13	65.11	66.42	68.87	71.71	73.9	98.37	77.35	83.96	64.86	86.22	87.37	53.76	65.79	67.29	780.35	904.19	677.99	761.99	960.37	783.51	907.18	750.77	829.45	1246.29	776.97	995.81	926.13	910.9	839.81	639.56	788.65	750.16	Gh_D05G0249	Gh_D05G0249	Auxin-responsive protein IAA27 [Source:UniProtKB/Swiss-Prot;Acc:Q9ZSY8]	Environmental Information Processing	Signal transduction	ko04075//Plant hormone signal transduction	GO:0005622//intracellular;GO:0043227//membrane-bounded organelle;GO:0005623//cell;GO:0044424//intracellular part;GO:0043229//intracellular organelle;GO:0044464//cell part;GO:0043226//organelle;GO:0043231//intracellular membrane-bounded organelle;GO:0005634//nucleus	GO:0046983//protein dimerization activity;GO:0005515//protein binding;GO:0001071//nucleic acid binding transcription factor activity;GO:0005488//binding;GO:0003700//sequence-specific DNA binding transcription factor activity	GO:0006139//nucleobase-containing compound metabolic process;GO:2000112//regulation of cellular macromolecule biosynthetic process;GO:1901362//organic cyclic compound biosynthetic process;GO:0009734//auxin-activated signaling pathway;GO:0065007//biological regulation;GO:1901360//organic cyclic compound metabolic process;GO:0032870//cellular response to hormone stimulus;GO:0044249//cellular biosyn…
Gh_D05G0472	11.86	11.67	8.93	13.71	15.53	12.12	9.74	10.99	12.47	5.63	5.77	7.08	5.98	7.05	7.3	5.96	6.37	5.64	218.98	221.89	148.21	237.3	343.98	214.73	192.67	172.78	210.24	107.05	86.99	126.11	128.36	111.94	105.34	106.47	114.75	94.37	Gh_D05G0472	Gh_D05G0472	Auxin-responsive protein IAA18 [Source:UniProtKB/Swiss-Prot;Acc:O24408]	Environmental Information Processing	Signal transduction	ko04075//Plant hormone signal transduction	GO:0044464//cell part;GO:0043226//organelle;GO:0043229//intracellular organelle;GO:0044424//intracellular part;GO:0005622//intracellular;GO:0005623//cell;GO:0005634//nucleus;GO:0043231//intracellular membrane-bounded organelle;GO:0043227//membrane-bounded organelle	GO:0005488//binding;GO:0003700//sequence-specific DNA binding transcription factor activity;GO:0005515//protein binding;GO:0001071//nucleic acid binding transcription factor activity;GO:0046983//protein dimerization activity	GO:0009755//hormone-mediated signaling pathway;GO:0051716//cellular response to stimulus;GO:0009058//biosynthetic process;GO:0034654//nucleobase-containing compound biosynthetic process;GO:0050896//response to stimulus;GO:0006807//nitrogen compound metabolic process;GO:0044260//cellular macromolecule metabolic process;GO:0044238//primary metabolic process;GO:0031326//regulation of cellular biosyn…
Gh_D05G0568	8.77	7.91	6.61	5.89	8.24	7.26	5.11	6.38	10.41	6.51	4.78	11.53	5.85	4.54	5.65	5.53	3.57	4.31	103.25	96	70.01	65	116.5	82	64.47	64	112	79	46	131	80	46	52	63	41	46	Gh_D05G0568	Gh_D05G0568	Auxin-responsive protein IAA29 [Source:UniProtKB/Swiss-Prot;Acc:Q93WC4]	Environmental Information Processing	Signal transduction	ko04075//Plant hormone signal transduction	GO:0044464//cell part;GO:0043227//membrane-bounded organelle;GO:0043229//intracellular organelle;GO:0005634//nucleus;GO:0043231//intracellular membrane-bounded organelle;GO:0043226//organelle;GO:0044424//intracellular part;GO:0005622//intracellular;GO:0005623//cell	GO:0001071//nucleic acid binding transcription factor activity;GO:0046983//protein dimerization activity;GO:0003700//sequence-specific DNA binding transcription factor activity;GO:0005488//binding;GO:0005515//protein binding	GO:0071704//organic substance metabolic process;GO:0006351//transcription, DNA-templated;GO:0071495//cellular response to endogenous stimulus;GO:0050896//response to stimulus;GO:0009725//response to hormone;GO:0009416//response to light stimulus;GO:0051252//regulation of RNA metabolic process;GO:0009058//biosynthetic process;GO:0010114//response to red light;GO:0032774//RNA biosynthetic process;G…
Gh_D05G1216	63.69	68.25	62.58	65.91	69	61.26	49.08	58.27	40.54	77.65	56.07	69.45	72.04	82.73	100.74	70.48	70.31	80.52	684.54	755.74	604.61	664.11	889.89	631.91	565.35	533.49	397.91	860.27	492.56	720.34	899.47	764.25	846.75	733.27	736.98	784.97	Gh_D05G1216	Gh_D05G1216	Auxin-responsive protein IAA16 [Source:UniProtKB/Swiss-Prot;Acc:O24407]	Environmental Information Processing	Signal transduction	ko04075//Plant hormone signal transduction	GO:0043229//intracellular organelle;GO:0044464//cell part;GO:0005634//nucleus;GO:0043226//organelle;GO:0005622//intracellular;GO:0043227//membrane-bounded organelle;GO:0005623//cell;GO:0044424//intracellular part;GO:0043231//intracellular membrane-bounded organelle	GO:0046983//protein dimerization activity;GO:0001071//nucleic acid binding transcription factor activity;GO:0005488//binding;GO:0005515//protein binding;GO:0003700//sequence-specific DNA binding transcription factor activity	GO:1901362//organic cyclic compound biosynthetic process;GO:0006725//cellular aromatic compound metabolic process;GO:0080090//regulation of primary metabolic process;GO:0007154//cell communication;GO:0031323//regulation of cellular metabolic process;GO:0090304//nucleic acid metabolic process;GO:0071365//cellular response to auxin stimulus;GO:0044238//primary metabolic process;GO:0071495//cellular…
Gh_D05G1217	41.65	32.03	35.2	41.17	46.34	31.06	21.04	26.55	20.38	64.98	57.19	66.79	77.55	65.41	75.61	61.27	65.89	71.64	391.93	310.57	297.74	363.21	523.37	280.5	212.17	212.87	175.16	630.36	439.87	606.6	847.84	529.07	556.45	558.1	604.78	611.52	Gh_D05G1217	Gh_D05G1217	Auxin-responsive protein IAA19 [Source:UniProtKB/Swiss-Prot;Acc:O24409]	Environmental Information Processing	Signal transduction	ko04075//Plant hormone signal transduction	GO:0044424//intracellular part;GO:0044464//cell part;GO:0005634//nucleus;GO:0005623//cell;GO:0043229//intracellular organelle;GO:0043226//organelle;GO:0043231//intracellular membrane-bounded organelle;GO:0043227//membrane-bounded organelle;GO:0005622//intracellular	GO:0046983//protein dimerization activity;GO:0003700//sequence-specific DNA binding transcription factor activity;GO:0001071//nucleic acid binding transcription factor activity;GO:0005515//protein binding;GO:0005488//binding	GO:0009725//response to hormone;GO:0044702//single organism reproductive process;GO:0050896//response to stimulus;GO:0016070//RNA metabolic process;GO:0018130//heterocycle biosynthetic process;GO:0023052//signaling;GO:0019222//regulation of metabolic process;GO:1903506//regulation of nucleic acid-templated transcription;GO:0032774//RNA biosynthetic process;GO:0032870//cellular response to hormone…
Gh_D05G1254	34.25	32.56	34.99	37.75	29.5	29.88	30.59	32.13	31.8	31.33	32.11	36.17	32.25	32.81	33.83	31.81	34.74	35.84	685.21	670.93	629.23	707.95	708.26	573.69	655.88	547.59	581.05	646.04	525.05	698.16	749.58	564.22	529.26	615.94	677.81	650.29	Gh_D05G1254	Gh_D05G1254	Auxin-responsive protein IAA27 [Source:UniProtKB/Swiss-Prot;Acc:Q9ZSY8]	Environmental Information Processing	Signal transduction	ko04075//Plant hormone signal transduction	GO:0005622//intracellular;GO:0043227//membrane-bounded organelle;GO:0005623//cell;GO:0044424//intracellular part;GO:0043229//intracellular organelle;GO:0044464//cell part;GO:0043226//organelle;GO:0043231//intracellular membrane-bounded organelle;GO:0005634//nucleus	GO:0046983//protein dimerization activity;GO:0005515//protein binding;GO:0001071//nucleic acid binding transcription factor activity;GO:0005488//binding;GO:0003700//sequence-specific DNA binding transcription factor activity	GO:0006139//nucleobase-containing compound metabolic process;GO:2000112//regulation of cellular macromolecule biosynthetic process;GO:1901362//organic cyclic compound biosynthetic process;GO:0009734//auxin-activated signaling pathway;GO:0065007//biological regulation;GO:1901360//organic cyclic compound metabolic process;GO:0032870//cellular response to hormone stimulus;GO:0044249//cellular biosyn…
Gh_D05G1269	19.07	16.29	15.98	8.06	11.1	11.68	7.34	6.25	6.98	23.27	15.23	21.73	9.33	11.89	10.14	4.86	6.67	5.53	308	271	232	122	215	181	127	86	103	387.29	201	338.59	174.99	165	128	75.99	105	81	Gh_D05G1269	Gh_D05G1269	Auxin-responsive protein IAA26 [Source:UniProtKB/Swiss-Prot;Acc:Q8LAL2]	Environmental Information Processing	Signal transduction	ko04075//Plant hormone signal transduction	GO:0044464//cell part;GO:0043231//intracellular membrane-bounded organelle;GO:0044424//intracellular part;GO:0005634//nucleus;GO:0043226//organelle;GO:0043227//membrane-bounded organelle;GO:0043229//intracellular organelle;GO:0005623//cell;GO:0005622//intracellular	GO:0005488//binding;GO:0003700//sequence-specific DNA binding transcription factor activity;GO:0005515//protein binding;GO:0001071//nucleic acid binding transcription factor activity;GO:0046983//protein dimerization activity	GO:0070887//cellular response to chemical stimulus;GO:1901360//organic cyclic compound metabolic process;GO:0019219//regulation of nucleobase-containing compound metabolic process;GO:0046483//heterocycle metabolic process;GO:0044238//primary metabolic process;GO:0071310//cellular response to organic substance;GO:0006351//transcription, DNA-templated;GO:0009725//response to hormone;GO:0009734//aux…
Gh_D05G3127	0	0	0	0	0	0	0	0	0	0	0	0	0	0	0	0	0	0	0	0	0	0	0	0	0	0	0	0	0	0	0	0	0	0	0	0	Gh_D05G3127	Gh_D05G3127	Auxin-responsive protein IAA32 [Source:UniProtKB/Swiss-Prot;Acc:Q8RYC6]	Environmental Information Processing	Signal transduction	ko04075//Plant hormone signal transduction	GO:0005622//intracellular;GO:0044464//cell part;GO:0043226//organelle;GO:0043229//intracellular organelle;GO:0005634//nucleus;GO:0043231//intracellular membrane-bounded organelle;GO:0044424//intracellular part;GO:0043227//membrane-bounded organelle;GO:0005623//cell	GO:0005488//binding;GO:0005515//protein binding;GO:0046983//protein dimerization activity;GO:0001071//nucleic acid binding transcription factor activity;GO:0003700//sequence-specific DNA binding transcription factor activity	GO:0009733//response to auxin;GO:0060255//regulation of macromolecule metabolic process;GO:0009725//response to hormone;GO:0010468//regulation of gene expression;GO:0034645//cellular macromolecule biosynthetic process;GO:0008152//metabolic process;GO:0006351//transcription, DNA-templated;GO:0048731//system development;GO:0051252//regulation of RNA metabolic process;GO:0044702//single organism rep…
Gh_D05G3823	114.72	113.76	117.02	107.15	115.96	107.19	115.84	134.44	108.97	83.28	94.6	91.35	104.19	67.33	62.02	98.88	95.61	90.91	2171	2217.81	1990.56	1901.1	2633.34	1946.97	2349.3	2167.3	1883.41	1624.62	1463.12	1668.23	2290.64	1095.21	917.88	1811.3	1764.65	1560.44	Gh_D05G3823	Gh_D05G3823	Auxin-responsive protein IAA8 [Source:UniProtKB/Swiss-Prot;Acc:Q38826]	Environmental Information Processing	Signal transduction	ko04075//Plant hormone signal transduction	GO:0043229//intracellular organelle;GO:0005622//intracellular;GO:0005623//cell;GO:0044464//cell part;GO:0043226//organelle;GO:0043231//intracellular membrane-bounded organelle;GO:0043227//membrane-bounded organelle;GO:0044424//intracellular part;GO:0005634//nucleus	GO:0005515//protein binding;GO:0046983//protein dimerization activity;GO:0005488//binding	GO:2001141//regulation of RNA biosynthetic process;GO:0043170//macromolecule metabolic process;GO:0019219//regulation of nucleobase-containing compound metabolic process;GO:0080090//regulation of primary metabolic process;GO:0044238//primary metabolic process;GO:0044700//single organism signaling;GO:0019222//regulation of metabolic process;GO:0010033//response to organic substance;GO:0019438//aro…
Gh_D06G0506	2.79	2.7	1.72	3.95	2.23	1.61	3.55	2.17	3.94	1.1	2.27	1.39	0.8	1.56	1.58	0.85	0.95	1.93	27.07	27	15	36	26	15	36.98	18	35	11	18	13	9	13	12	8	9	17	Gh_D06G0506	Gh_D06G0506	Auxin-responsive protein IAA13 [Source:UniProtKB/Swiss-Prot;Acc:Q38831]	Environmental Information Processing	Signal transduction	ko04075//Plant hormone signal transduction	GO:0043231//intracellular membrane-bounded organelle;GO:0043227//membrane-bounded organelle;GO:0044464//cell part;GO:0005623//cell;GO:0043229//intracellular organelle;GO:0043226//organelle;GO:0044424//intracellular part;GO:0005622//intracellular;GO:0005634//nucleus	GO:0001071//nucleic acid binding transcription factor activity;GO:0003700//sequence-specific DNA binding transcription factor activity;GO:0005488//binding;GO:0046983//protein dimerization activity;GO:0005515//protein binding	GO:0071495//cellular response to endogenous stimulus;GO:0050794//regulation of cellular process;GO:0009725//response to hormone;GO:0010467//gene expression;GO:0050896//response to stimulus;GO:0044249//cellular biosynthetic process;GO:2001141//regulation of RNA biosynthetic process;GO:0010033//response to organic substance;GO:0006139//nucleobase-containing compound metabolic process;GO:0051252//re…
Gh_D06G2010	3.74	5.35	7.29	10.09	6.67	4.33	3.49	2.44	3.64	7.67	9.29	4.63	15.31	11.74	13.56	11.17	17.91	18	36	53	63	91	77	40	36	20	32	76	73	43	171	97	102	104	168	157	Gh_D06G2010	Gh_D06G2010	Auxin-responsive protein IAA19 [Source:UniProtKB/Swiss-Prot;Acc:O24409]	Environmental Information Processing	Signal transduction	ko04075//Plant hormone signal transduction	GO:0044424//intracellular part;GO:0044464//cell part;GO:0005634//nucleus;GO:0005623//cell;GO:0043229//intracellular organelle;GO:0043226//organelle;GO:0043231//intracellular membrane-bounded organelle;GO:0043227//membrane-bounded organelle;GO:0005622//intracellular	GO:0046983//protein dimerization activity;GO:0003700//sequence-specific DNA binding transcription factor activity;GO:0001071//nucleic acid binding transcription factor activity;GO:0005515//protein binding;GO:0005488//binding	GO:0009725//response to hormone;GO:0044702//single organism reproductive process;GO:0050896//response to stimulus;GO:0016070//RNA metabolic process;GO:0018130//heterocycle biosynthetic process;GO:0023052//signaling;GO:0019222//regulation of metabolic process;GO:1903506//regulation of nucleic acid-templated transcription;GO:0032774//RNA biosynthetic process;GO:0032870//cellular response to hormone…
Gh_D06G2039	3.82	2.79	3.01	2.22	2.31	2.1	2.01	2.36	2.21	5.08	4.08	4.75	0.48	1.7	2.31	1.51	0.71	0.61	55	41.4	39	30	40	29	31	29	29	75.42	48	66	8	21	26	21	10	8	Gh_D06G2039	Gh_D06G2039	Auxin-responsive protein IAA18 [Source:UniProtKB/Swiss-Prot;Acc:O24408]	Environmental Information Processing	Signal transduction	ko04075//Plant hormone signal transduction	GO:0044464//cell part;GO:0043226//organelle;GO:0043229//intracellular organelle;GO:0044424//intracellular part;GO:0005622//intracellular;GO:0005623//cell;GO:0005634//nucleus;GO:0043231//intracellular membrane-bounded organelle;GO:0043227//membrane-bounded organelle	GO:0005488//binding;GO:0003700//sequence-specific DNA binding transcription factor activity;GO:0005515//protein binding;GO:0001071//nucleic acid binding transcription factor activity;GO:0046983//protein dimerization activity	GO:0009755//hormone-mediated signaling pathway;GO:0051716//cellular response to stimulus;GO:0009058//biosynthetic process;GO:0034654//nucleobase-containing compound biosynthetic process;GO:0050896//response to stimulus;GO:0006807//nitrogen compound metabolic process;GO:0044260//cellular macromolecule metabolic process;GO:0044238//primary metabolic process;GO:0031326//regulation of cellular biosyn…
Gh_D06G2318	170	153.71	124.61	168.86	196.87	178.61	211.64	241.45	228.62	175.44	166.11	173.29	183.48	194.11	173.37	157.7	199.71	171.46	3129.9	2915.32	2062.1	2914.49	4349.3	3155.85	4175.59	3786.74	3843.92	3329.38	2499.32	3078.65	3924.15	3071.68	2496.09	2810.2	3585.72	2863.05	Gh_D06G2318	Gh_D06G2318	Auxin-responsive protein IAA9 [Source:UniProtKB/Swiss-Prot;Acc:Q38827]	Environmental Information Processing	Signal transduction	ko04075//Plant hormone signal transduction	GO:0043227//membrane-bounded organelle;GO:0044464//cell part;GO:0043231//intracellular membrane-bounded organelle;GO:0043226//organelle;GO:0043229//intracellular organelle;GO:0005622//intracellular;GO:0005634//nucleus;GO:0005623//cell;GO:0044424//intracellular part	GO:0005488//binding;GO:0001071//nucleic acid binding transcription factor activity;GO:0005515//protein binding;GO:0046983//protein dimerization activity;GO:0003700//sequence-specific DNA binding transcription factor activity	GO:0010467//gene expression;GO:0090304//nucleic acid metabolic process;GO:0050896//response to stimulus;GO:0065007//biological regulation;GO:0044763//single-organism cellular process;GO:0006807//nitrogen compound metabolic process;GO:0009889//regulation of biosynthetic process;GO:1903506//regulation of nucleic acid-templated transcription;GO:0006725//cellular aromatic compound metabolic process;G…
Gh_D07G0374	4.5	2.48	4	3.66	3.26	3.45	1.97	2.73	3.06	6.51	4.78	4.83	2.84	3.93	3.88	2.24	3.58	4.47	54.56	30.99	43.65	41.67	47.42	40.2	25.62	28.26	33.94	81.39	47.45	56.54	40	41	36.85	26.3	42.41	49.24	Gh_D07G0374	Gh_D07G0374	Auxin-responsive protein IAA29 [Source:UniProtKB/Swiss-Prot;Acc:Q93WC4]	Environmental Information Processing	Signal transduction	ko04075//Plant hormone signal transduction	GO:0044464//cell part;GO:0043227//membrane-bounded organelle;GO:0043229//intracellular organelle;GO:0005634//nucleus;GO:0043231//intracellular membrane-bounded organelle;GO:0043226//organelle;GO:0044424//intracellular part;GO:0005622//intracellular;GO:0005623//cell	GO:0001071//nucleic acid binding transcription factor activity;GO:0046983//protein dimerization activity;GO:0003700//sequence-specific DNA binding transcription factor activity;GO:0005488//binding;GO:0005515//protein binding	GO:0071704//organic substance metabolic process;GO:0006351//transcription, DNA-templated;GO:0071495//cellular response to endogenous stimulus;GO:0050896//response to stimulus;GO:0009725//response to hormone;GO:0009416//response to light stimulus;GO:0051252//regulation of RNA metabolic process;GO:0009058//biosynthetic process;GO:0010114//response to red light;GO:0032774//RNA biosynthetic process;G…
Gh_D07G1301	0.94	0.11	0.26	0.25	0.39	0.49	1.31	0.47	0.51	0	0	0	0	0.41	0	0	0	0	8	1	2	2	4	4	12	3.43	4	0	0	0	0	3	0	0	0	0	Gh_D07G1301	Gh_D07G1301	Auxin-responsive protein IAA30 [Source:UniProtKB/Swiss-Prot;Acc:Q9M1R4]	Environmental Information Processing	Signal transduction	ko04075//Plant hormone signal transduction	GO:0005623//cell;GO:0043226//organelle;GO:0043229//intracellular organelle;GO:0043231//intracellular membrane-bounded organelle;GO:0044464//cell part;GO:0005622//intracellular;GO:0005634//nucleus;GO:0043227//membrane-bounded organelle;GO:0044424//intracellular part	GO:0046983//protein dimerization activity;GO:0003700//sequence-specific DNA binding transcription factor activity;GO:0005515//protein binding;GO:0001071//nucleic acid binding transcription factor activity;GO:0005488//binding	GO:0010468//regulation of gene expression;GO:0009755//hormone-mediated signaling pathway;GO:0034645//cellular macromolecule biosynthetic process;GO:0044699//single-organism process;GO:0019438//aromatic compound biosynthetic process;GO:0046483//heterocycle metabolic process;GO:0010556//regulation of macromolecule biosynthetic process;GO:0010033//response to organic substance;GO:1901360//organic cy…
Gh_D07G1526	4.35	3.82	4.47	4.06	4.68	3.36	3.93	5.25	3.38	2.32	4.29	3.35	2.13	2.61	3.05	3.7	3.26	3.64	62	56	57.24	54.21	80	46	60	63.74	44	34	50	46	35.18	32	34	51	45.27	47	Gh_D07G1526	Gh_D07G1526	Auxin-responsive protein IAA11 [Source:UniProtKB/Swiss-Prot;Acc:Q38829]	Environmental Information Processing	Signal transduction	ko04075//Plant hormone signal transduction	GO:0043227//membrane-bounded organelle;GO:0005622//intracellular;GO:0030054//cell junction;GO:0055044//symplast;GO:0043229//intracellular organelle;GO:0043226//organelle;GO:0005634//nucleus;GO:0044464//cell part;GO:0044424//intracellular part;GO:0009506//plasmodesma;GO:0043231//intracellular membrane-bounded organelle;GO:0005911//cell-cell junction;GO:0005623//cell	GO:0003700//sequence-specific DNA binding transcription factor activity;GO:0005515//protein binding;GO:0001071//nucleic acid binding transcription factor activity;GO:0046983//protein dimerization activity;GO:0005488//binding	GO:0044237//cellular metabolic process;GO:0009733//response to auxin;GO:0070887//cellular response to chemical stimulus;GO:0009987//cellular process;GO:0031326//regulation of cellular biosynthetic process;GO:0071495//cellular response to endogenous stimulus;GO:0051171//regulation of nitrogen compound metabolic process;GO:0097659//nucleic acid-templated transcription;GO:0009734//auxin-activated si…
Gh_D07G2124	95.71	212.63	106.71	150.18	181.34	181.59	109.9	105.15	105.99	57.56	41.69	45.6	91.37	84.64	45.38	193.37	103.06	117.64	910.56	2083.96	912.54	1339.43	2070.3	1658.1	1120.48	852.21	920.93	564.44	324.14	418.63	1009.87	692.11	337.62	1780.68	956.21	1015.08	Gh_D07G2124	Gh_D07G2124	Auxin-responsive protein IAA4 [Source:UniProtKB/Swiss-Prot;Acc:P33077]	Environmental Information Processing	Signal transduction	ko04075//Plant hormone signal transduction	GO:0005622//intracellular;GO:0043231//intracellular membrane-bounded organelle;GO:0044424//intracellular part;GO:0044464//cell part;GO:0043226//organelle;GO:0043229//intracellular organelle;GO:0005623//cell;GO:0043227//membrane-bounded organelle;GO:0005634//nucleus	GO:0001071//nucleic acid binding transcription factor activity;GO:0003700//sequence-specific DNA binding transcription factor activity;GO:0044212//transcription regulatory region DNA binding;GO:0005488//binding;GO:0001067//regulatory region nucleic acid binding;GO:1901363//heterocyclic compound binding;GO:0003677//DNA binding;GO:0005515//protein binding;GO:0046983//protein dimerization activity;G…	GO:0010467//gene expression;GO:0044700//single organism signaling;GO:0016070//RNA metabolic process;GO:0006139//nucleobase-containing compound metabolic process;GO:1901362//organic cyclic compound biosynthetic process;GO:0009733//response to auxin;GO:0009059//macromolecule biosynthetic process;GO:0071310//cellular response to organic substance;GO:1901360//organic cyclic compound metabolic process…
Gh_D07G2125	24.22	22.8	22.82	44.05	39.82	31.21	43.98	66.34	58.94	31.78	32.92	33.17	67.51	54.25	65.69	65.57	81.62	108.09	357.45	346.67	302.69	609.51	705.34	442.05	695.64	834.04	794.42	483.48	397.14	472.4	1157.57	688.23	758.18	936.67	1174.8	1446.92	Gh_D07G2125	Gh_D07G2125	Auxin-responsive protein IAA7 [Source:UniProtKB/Swiss-Prot;Acc:Q38825]	Environmental Information Processing	Signal transduction	ko04075//Plant hormone signal transduction	GO:0005623//cell;GO:0043227//membrane-bounded organelle;GO:0044424//intracellular part;GO:0044464//cell part;GO:0043226//organelle;GO:0005634//nucleus;GO:0005622//intracellular;GO:0043231//intracellular membrane-bounded organelle;GO:0043229//intracellular organelle	GO:0005488//binding;GO:0001071//nucleic acid binding transcription factor activity;GO:0005515//protein binding;GO:0046983//protein dimerization activity;GO:0003700//sequence-specific DNA binding transcription factor activity	GO:0071310//cellular response to organic substance;GO:0006355//regulation of transcription, DNA-templated;GO:0009628//response to abiotic stimulus;GO:0009734//auxin-activated signaling pathway;GO:0034654//nucleobase-containing compound biosynthetic process;GO:0050794//regulation of cellular process;GO:0009058//biosynthetic process;GO:2001141//regulation of RNA biosynthetic process;GO:0009733//res…
Gh_D08G0665	30.78	64.02	34.9	53.92	66.75	82.44	49.55	39.3	39.16	13.03	8.5	9.22	27.29	27.29	22.27	94.45	42.28	57.38	318.21	681.78	324.24	522.51	827.91	817.89	548.94	346.02	369.69	138.88	71.78	92	327.65	242.47	180	944.94	426.23	537.97	Gh_D08G0665	Gh_D08G0665	Auxin-responsive protein IAA4 [Source:UniProtKB/Swiss-Prot;Acc:P33077]	Environmental Information Processing	Signal transduction	ko04075//Plant hormone signal transduction	GO:0005622//intracellular;GO:0043231//intracellular membrane-bounded organelle;GO:0044424//intracellular part;GO:0044464//cell part;GO:0043226//organelle;GO:0043229//intracellular organelle;GO:0005623//cell;GO:0043227//membrane-bounded organelle;GO:0005634//nucleus	GO:0001071//nucleic acid binding transcription factor activity;GO:0003700//sequence-specific DNA binding transcription factor activity;GO:0044212//transcription regulatory region DNA binding;GO:0005488//binding;GO:0001067//regulatory region nucleic acid binding;GO:1901363//heterocyclic compound binding;GO:0003677//DNA binding;GO:0005515//protein binding;GO:0046983//protein dimerization activity;G…	GO:0010467//gene expression;GO:0044700//single organism signaling;GO:0016070//RNA metabolic process;GO:0006139//nucleobase-containing compound metabolic process;GO:1901362//organic cyclic compound biosynthetic process;GO:0009733//response to auxin;GO:0009059//macromolecule biosynthetic process;GO:0071310//cellular response to organic substance;GO:1901360//organic cyclic compound metabolic process…
Gh_D08G1355	5.91	3.96	5.97	6.65	4.49	4.17	3.61	6.14	4.31	10.81	7.96	8.51	6.78	9.14	8.5	2.39	6.56	4.34	48.06	33.15	43.62	50.67	43.81	32.53	31.44	42.49	32	90.55	52.87	66.72	64	63.84	54	18.78	51.97	32	Gh_D08G1355	Gh_D08G1355	Auxin-responsive protein IAA30 [Source:UniProtKB/Swiss-Prot;Acc:Q9M1R4]	Environmental Information Processing	Signal transduction	ko04075//Plant hormone signal transduction	GO:0005623//cell;GO:0043226//organelle;GO:0043229//intracellular organelle;GO:0043231//intracellular membrane-bounded organelle;GO:0044464//cell part;GO:0005622//intracellular;GO:0005634//nucleus;GO:0043227//membrane-bounded organelle;GO:0044424//intracellular part	GO:0046983//protein dimerization activity;GO:0003700//sequence-specific DNA binding transcription factor activity;GO:0005515//protein binding;GO:0001071//nucleic acid binding transcription factor activity;GO:0005488//binding	GO:0010468//regulation of gene expression;GO:0009755//hormone-mediated signaling pathway;GO:0034645//cellular macromolecule biosynthetic process;GO:0044699//single-organism process;GO:0019438//aromatic compound biosynthetic process;GO:0046483//heterocycle metabolic process;GO:0010556//regulation of macromolecule biosynthetic process;GO:0010033//response to organic substance;GO:1901360//organic cy…
Gh_D08G2060	22.69	15.51	16.39	20.98	21	17.5	17.53	22.69	19.01	18.99	20.09	24.03	29.03	29.8	32.82	27.17	31.34	30.52	351.22	247.34	228	304.5	390	260	290.74	299.2	268.77	303	254.21	359	522	396.46	397.25	407.03	473.04	428.54	Gh_D08G2060	Gh_D08G2060	Auxin-responsive protein IAA11 [Source:UniProtKB/Swiss-Prot;Acc:Q38829]	Environmental Information Processing	Signal transduction	ko04075//Plant hormone signal transduction	GO:0043227//membrane-bounded organelle;GO:0005622//intracellular;GO:0030054//cell junction;GO:0055044//symplast;GO:0043229//intracellular organelle;GO:0043226//organelle;GO:0005634//nucleus;GO:0044464//cell part;GO:0044424//intracellular part;GO:0009506//plasmodesma;GO:0043231//intracellular membrane-bounded organelle;GO:0005911//cell-cell junction;GO:0005623//cell	GO:0003700//sequence-specific DNA binding transcription factor activity;GO:0005515//protein binding;GO:0001071//nucleic acid binding transcription factor activity;GO:0046983//protein dimerization activity;GO:0005488//binding	GO:0044237//cellular metabolic process;GO:0009733//response to auxin;GO:0070887//cellular response to chemical stimulus;GO:0009987//cellular process;GO:0031326//regulation of cellular biosynthetic process;GO:0071495//cellular response to endogenous stimulus;GO:0051171//regulation of nitrogen compound metabolic process;GO:0097659//nucleic acid-templated transcription;GO:0009734//auxin-activated si…
Gh_D08G2503	12.78	10.23	11.29	10.46	18.52	12.27	11.24	11.17	12.01	6.73	7.14	10.4	6.43	5.87	7.3	5.48	8.12	4.67	141.93	117.09	112.75	108.89	246.89	130.81	133.86	105.66	121.8	77	64.79	111.5	82.91	56	63.43	58.95	87.93	47	Gh_D08G2503	Gh_D08G2503	Auxin-responsive protein IAA16 [Source:UniProtKB/Swiss-Prot;Acc:O24407]	Environmental Information Processing	Signal transduction	ko04075//Plant hormone signal transduction	GO:0043229//intracellular organelle;GO:0044464//cell part;GO:0005634//nucleus;GO:0043226//organelle;GO:0005622//intracellular;GO:0043227//membrane-bounded organelle;GO:0005623//cell;GO:0044424//intracellular part;GO:0043231//intracellular membrane-bounded organelle	GO:0046983//protein dimerization activity;GO:0001071//nucleic acid binding transcription factor activity;GO:0005488//binding;GO:0005515//protein binding;GO:0003700//sequence-specific DNA binding transcription factor activity	GO:1901362//organic cyclic compound biosynthetic process;GO:0006725//cellular aromatic compound metabolic process;GO:0080090//regulation of primary metabolic process;GO:0007154//cell communication;GO:0031323//regulation of cellular metabolic process;GO:0090304//nucleic acid metabolic process;GO:0071365//cellular response to auxin stimulus;GO:0044238//primary metabolic process;GO:0071495//cellular…
Gh_D09G2152	2.73	2.35	2.92	12.45	5.73	3.07	4.8	5.06	6.45	1.02	0.9	2.07	5.91	2.08	2.15	2.93	12.39	5.45	26	23	25	111	65.44	28	48.97	41	56	10	7	19	65.36	17	16	27	115	47	Gh_D09G2152	Gh_D09G2152	Auxin-responsive protein IAA4 [Source:UniProtKB/Swiss-Prot;Acc:P33077]	Environmental Information Processing	Signal transduction	ko04075//Plant hormone signal transduction	GO:0005622//intracellular;GO:0043231//intracellular membrane-bounded organelle;GO:0044424//intracellular part;GO:0044464//cell part;GO:0043226//organelle;GO:0043229//intracellular organelle;GO:0005623//cell;GO:0043227//membrane-bounded organelle;GO:0005634//nucleus	GO:0001071//nucleic acid binding transcription factor activity;GO:0003700//sequence-specific DNA binding transcription factor activity;GO:0044212//transcription regulatory region DNA binding;GO:0005488//binding;GO:0001067//regulatory region nucleic acid binding;GO:1901363//heterocyclic compound binding;GO:0003677//DNA binding;GO:0005515//protein binding;GO:0046983//protein dimerization activity;G…	GO:0010467//gene expression;GO:0044700//single organism signaling;GO:0016070//RNA metabolic process;GO:0006139//nucleobase-containing compound metabolic process;GO:1901362//organic cyclic compound biosynthetic process;GO:0009733//response to auxin;GO:0009059//macromolecule biosynthetic process;GO:0071310//cellular response to organic substance;GO:1901360//organic cyclic compound metabolic process…
Gh_D09G2153	25.77	52.43	42.04	58.05	37.65	46.07	34.13	35.68	31.81	12.57	13.32	12.09	13.28	13.3	13.46	18.54	25.91	21.69	237.24	497.19	347.82	500.93	415.85	407.01	336.71	279.78	267.41	119.23	100.22	107.37	142.05	105.23	96.88	165.22	232.59	181.06	Gh_D09G2153	Gh_D09G2153	Auxin-responsive protein IAA14 [Source:UniProtKB/Swiss-Prot;Acc:Q38832]	Environmental Information Processing	Signal transduction	ko04075//Plant hormone signal transduction	GO:0005634//nucleus;GO:0044424//intracellular part;GO:0043227//membrane-bounded organelle;GO:0044464//cell part;GO:0005623//cell;GO:0005622//intracellular;GO:0043231//intracellular membrane-bounded organelle;GO:0043229//intracellular organelle;GO:0043226//organelle	GO:0005515//protein binding;GO:0001071//nucleic acid binding transcription factor activity;GO:0003700//sequence-specific DNA binding transcription factor activity;GO:0005488//binding;GO:0046983//protein dimerization activity	GO:0010033//response to organic substance;GO:0046483//heterocycle metabolic process;GO:0032774//RNA biosynthetic process;GO:1903507//negative regulation of nucleic acid-templated transcription;GO:0006807//nitrogen compound metabolic process;GO:0007154//cell communication;GO:0070887//cellular response to chemical stimulus;GO:0007275//multicellular organismal development;GO:0031326//regulation of c…
Gh_D09G2198	11.46	8.93	11.01	13.42	13.5	8.44	7.99	9.27	7.67	15.61	17.42	12.65	19.42	18.52	21.54	18.32	18.3	20.48	198	159	171	217.41	280	140	148	136.41	121	278	246	211	389.87	275	291	306.45	308.36	321	Gh_D09G2198	Gh_D09G2198	Auxin-responsive protein IAA13 [Source:UniProtKB/Swiss-Prot;Acc:Q38831]	Environmental Information Processing	Signal transduction	ko04075//Plant hormone signal transduction	GO:0043231//intracellular membrane-bounded organelle;GO:0043227//membrane-bounded organelle;GO:0044464//cell part;GO:0005623//cell;GO:0043229//intracellular organelle;GO:0043226//organelle;GO:0044424//intracellular part;GO:0005622//intracellular;GO:0005634//nucleus	GO:0001071//nucleic acid binding transcription factor activity;GO:0003700//sequence-specific DNA binding transcription factor activity;GO:0005488//binding;GO:0046983//protein dimerization activity;GO:0005515//protein binding	GO:0071495//cellular response to endogenous stimulus;GO:0050794//regulation of cellular process;GO:0009725//response to hormone;GO:0010467//gene expression;GO:0050896//response to stimulus;GO:0044249//cellular biosynthetic process;GO:2001141//regulation of RNA biosynthetic process;GO:0010033//response to organic substance;GO:0006139//nucleobase-containing compound metabolic process;GO:0051252//re…
Gh_D10G0616	141.26	112.96	91.51	95.71	103.34	115.31	117.88	119.17	124.92	86.47	82.14	102.75	65.88	60.83	60.77	57.28	65.02	71.37	2455.41	2022.83	1429.71	1559.55	2155.54	1923.65	2195.94	1764.61	1982.96	1549.18	1166.91	1723.52	1330.26	908.89	826.03	963.77	1102.21	1125.23	Gh_D10G0616	Gh_D10G0616	Auxin-responsive protein IAA26 [Source:UniProtKB/Swiss-Prot;Acc:Q8LAL2]	Environmental Information Processing	Signal transduction	ko04075//Plant hormone signal transduction	GO:0044464//cell part;GO:0043231//intracellular membrane-bounded organelle;GO:0044424//intracellular part;GO:0005634//nucleus;GO:0043226//organelle;GO:0043227//membrane-bounded organelle;GO:0043229//intracellular organelle;GO:0005623//cell;GO:0005622//intracellular	GO:0005488//binding;GO:0003700//sequence-specific DNA binding transcription factor activity;GO:0005515//protein binding;GO:0001071//nucleic acid binding transcription factor activity;GO:0046983//protein dimerization activity	GO:0070887//cellular response to chemical stimulus;GO:1901360//organic cyclic compound metabolic process;GO:0019219//regulation of nucleobase-containing compound metabolic process;GO:0046483//heterocycle metabolic process;GO:0044238//primary metabolic process;GO:0071310//cellular response to organic substance;GO:0006351//transcription, DNA-templated;GO:0009725//response to hormone;GO:0009734//aux…
Gh_D10G0643	0	0	0.19	0.46	0	0.36	0.24	0.1	0	0	0.1	0	0	0	0	0	0	0	0	0	2	5	0	4	3	1	0	0	1	0	0	0	0	0	0	0	Gh_D10G0643	Gh_D10G0643	Auxin-responsive protein IAA27 [Source:UniProtKB/Swiss-Prot;Acc:Q9ZSY8]	Environmental Information Processing	Signal transduction	ko04075//Plant hormone signal transduction	GO:0005622//intracellular;GO:0043227//membrane-bounded organelle;GO:0005623//cell;GO:0044424//intracellular part;GO:0043229//intracellular organelle;GO:0044464//cell part;GO:0043226//organelle;GO:0043231//intracellular membrane-bounded organelle;GO:0005634//nucleus	GO:0046983//protein dimerization activity;GO:0005515//protein binding;GO:0001071//nucleic acid binding transcription factor activity;GO:0005488//binding;GO:0003700//sequence-specific DNA binding transcription factor activity	GO:0006139//nucleobase-containing compound metabolic process;GO:2000112//regulation of cellular macromolecule biosynthetic process;GO:1901362//organic cyclic compound biosynthetic process;GO:0009734//auxin-activated signaling pathway;GO:0065007//biological regulation;GO:1901360//organic cyclic compound metabolic process;GO:0032870//cellular response to hormone stimulus;GO:0044249//cellular biosyn…
Gh_D10G0965	22.62	26.63	27.49	18.29	19.48	17.41	10.79	12.75	11.42	14.12	19.6	17.17	10.87	9.01	9.12	10.07	8.45	7.77	410.57	497.98	448.54	311.25	424.39	303.26	209.96	197.09	189.27	264.13	290.72	300.78	229.15	140.55	129.53	176.99	149.63	127.98	Gh_D10G0965	Gh_D10G0965	Auxin-responsive protein IAA9 [Source:UniProtKB/Swiss-Prot;Acc:Q38827]	Environmental Information Processing	Signal transduction	ko04075//Plant hormone signal transduction	GO:0043227//membrane-bounded organelle;GO:0044464//cell part;GO:0043231//intracellular membrane-bounded organelle;GO:0043226//organelle;GO:0043229//intracellular organelle;GO:0005622//intracellular;GO:0005634//nucleus;GO:0005623//cell;GO:0044424//intracellular part	GO:0005488//binding;GO:0001071//nucleic acid binding transcription factor activity;GO:0005515//protein binding;GO:0046983//protein dimerization activity;GO:0003700//sequence-specific DNA binding transcription factor activity	GO:0010467//gene expression;GO:0090304//nucleic acid metabolic process;GO:0050896//response to stimulus;GO:0065007//biological regulation;GO:0044763//single-organism cellular process;GO:0006807//nitrogen compound metabolic process;GO:0009889//regulation of biosynthetic process;GO:1903506//regulation of nucleic acid-templated transcription;GO:0006725//cellular aromatic compound metabolic process;G…
Gh_D10G1512	1.74	1.79	2.66	5.21	2.44	3.15	0.81	1.71	1.73	3.16	1.06	1.91	2.81	1.39	2.64	3.25	3.12	2.75	16	17	22	45	27	27.85	8	13.37	14.51	30	8	17	30	11	19	29	28	23	Gh_D10G1512	Gh_D10G1512	Auxin-responsive protein IAA4 [Source:UniProtKB/Swiss-Prot;Acc:P33077]	Environmental Information Processing	Signal transduction	ko04075//Plant hormone signal transduction	GO:0005622//intracellular;GO:0043231//intracellular membrane-bounded organelle;GO:0044424//intracellular part;GO:0044464//cell part;GO:0043226//organelle;GO:0043229//intracellular organelle;GO:0005623//cell;GO:0043227//membrane-bounded organelle;GO:0005634//nucleus	GO:0001071//nucleic acid binding transcription factor activity;GO:0003700//sequence-specific DNA binding transcription factor activity;GO:0044212//transcription regulatory region DNA binding;GO:0005488//binding;GO:0001067//regulatory region nucleic acid binding;GO:1901363//heterocyclic compound binding;GO:0003677//DNA binding;GO:0005515//protein binding;GO:0046983//protein dimerization activity;G…	GO:0010467//gene expression;GO:0044700//single organism signaling;GO:0016070//RNA metabolic process;GO:0006139//nucleobase-containing compound metabolic process;GO:1901362//organic cyclic compound biosynthetic process;GO:0009733//response to auxin;GO:0009059//macromolecule biosynthetic process;GO:0071310//cellular response to organic substance;GO:1901360//organic cyclic compound metabolic process…
Gh_D10G1600	33.46	32.57	36.45	44.82	38	25.69	34.25	41.98	36.79	32.75	34.05	38.96	42.4	38.7	37.06	31.71	40.34	42.03	571.28	572.87	559.43	717.42	778.45	421.03	626.6	610.55	573.72	576.44	475.1	641.94	841.02	567.99	494.76	524.06	671.64	650.9	Gh_D10G1600	Gh_D10G1600	Auxin-responsive protein IAA13 [Source:UniProtKB/Swiss-Prot;Acc:Q38831]	Environmental Information Processing	Signal transduction	ko04075//Plant hormone signal transduction	GO:0043231//intracellular membrane-bounded organelle;GO:0043227//membrane-bounded organelle;GO:0044464//cell part;GO:0005623//cell;GO:0043229//intracellular organelle;GO:0043226//organelle;GO:0044424//intracellular part;GO:0005622//intracellular;GO:0005634//nucleus	GO:0001071//nucleic acid binding transcription factor activity;GO:0003700//sequence-specific DNA binding transcription factor activity;GO:0005488//binding;GO:0046983//protein dimerization activity;GO:0005515//protein binding	GO:0071495//cellular response to endogenous stimulus;GO:0050794//regulation of cellular process;GO:0009725//response to hormone;GO:0010467//gene expression;GO:0050896//response to stimulus;GO:0044249//cellular biosynthetic process;GO:2001141//regulation of RNA biosynthetic process;GO:0010033//response to organic substance;GO:0006139//nucleobase-containing compound metabolic process;GO:0051252//re…
Gh_D11G1104	0.45	0.66	0.3	1.29	0.76	0.83	0.32	0.27	1.49	1.53	0.92	1.06	1.27	1.98	0.87	0	0.15	1.38	4	6	2.4	10.64	8	7	3	2	12	13.89	6.6	9	13	15	6	0	1.25	11	Gh_D11G1104	Gh_D11G1104	Auxin-responsive protein IAA30 [Source:UniProtKB/Swiss-Prot;Acc:Q9M1R4]	Environmental Information Processing	Signal transduction	ko04075//Plant hormone signal transduction	GO:0005623//cell;GO:0043226//organelle;GO:0043229//intracellular organelle;GO:0043231//intracellular membrane-bounded organelle;GO:0044464//cell part;GO:0005622//intracellular;GO:0005634//nucleus;GO:0043227//membrane-bounded organelle;GO:0044424//intracellular part	GO:0046983//protein dimerization activity;GO:0003700//sequence-specific DNA binding transcription factor activity;GO:0005515//protein binding;GO:0001071//nucleic acid binding transcription factor activity;GO:0005488//binding	GO:0010468//regulation of gene expression;GO:0009755//hormone-mediated signaling pathway;GO:0034645//cellular macromolecule biosynthetic process;GO:0044699//single-organism process;GO:0019438//aromatic compound biosynthetic process;GO:0046483//heterocycle metabolic process;GO:0010556//regulation of macromolecule biosynthetic process;GO:0010033//response to organic substance;GO:1901360//organic cy…
Gh_D11G1320	206.33	190.59	167.53	201.85	224.14	202.87	162.76	196.73	188.33	176.25	182.29	177.3	202.4	250.16	256.38	206.5	211.64	216.94	2504.15	2382.9	1827.59	2296.55	3264.41	2363.01	2116.88	2033.88	2087.36	2204.89	1808.09	2076.46	2853.6	2609.63	2433.35	2425.83	2504.99	2388.01	Gh_D11G1320	Gh_D11G1320	Auxin-responsive protein IAA14 [Source:UniProtKB/Swiss-Prot;Acc:Q38832]	Environmental Information Processing	Signal transduction	ko04075//Plant hormone signal transduction	GO:0005634//nucleus;GO:0044424//intracellular part;GO:0043227//membrane-bounded organelle;GO:0044464//cell part;GO:0005623//cell;GO:0005622//intracellular;GO:0043231//intracellular membrane-bounded organelle;GO:0043229//intracellular organelle;GO:0043226//organelle	GO:0005515//protein binding;GO:0001071//nucleic acid binding transcription factor activity;GO:0003700//sequence-specific DNA binding transcription factor activity;GO:0005488//binding;GO:0046983//protein dimerization activity	GO:0010033//response to organic substance;GO:0046483//heterocycle metabolic process;GO:0032774//RNA biosynthetic process;GO:1903507//negative regulation of nucleic acid-templated transcription;GO:0006807//nitrogen compound metabolic process;GO:0007154//cell communication;GO:0070887//cellular response to chemical stimulus;GO:0007275//multicellular organismal development;GO:0031326//regulation of c…
Gh_D11G1377	9.02	11.53	11.03	13.88	16.04	11.34	11.13	12.96	15.22	6.73	8.53	8.34	10.66	5.48	6.16	10.14	14.48	11.34	142.37	187.46	156.47	205.48	303.85	171.78	188.3	174.29	219.49	109.45	110	127	195.51	74.42	76	155	223	162.36	Gh_D11G1377	Gh_D11G1377	Auxin-responsive protein IAA11 [Source:UniProtKB/Swiss-Prot;Acc:Q38829]	Environmental Information Processing	Signal transduction	ko04075//Plant hormone signal transduction	GO:0043227//membrane-bounded organelle;GO:0005622//intracellular;GO:0030054//cell junction;GO:0055044//symplast;GO:0043229//intracellular organelle;GO:0043226//organelle;GO:0005634//nucleus;GO:0044464//cell part;GO:0044424//intracellular part;GO:0009506//plasmodesma;GO:0043231//intracellular membrane-bounded organelle;GO:0005911//cell-cell junction;GO:0005623//cell	GO:0003700//sequence-specific DNA binding transcription factor activity;GO:0005515//protein binding;GO:0001071//nucleic acid binding transcription factor activity;GO:0046983//protein dimerization activity;GO:0005488//binding	GO:0044237//cellular metabolic process;GO:0009733//response to auxin;GO:0070887//cellular response to chemical stimulus;GO:0009987//cellular process;GO:0031326//regulation of cellular biosynthetic process;GO:0071495//cellular response to endogenous stimulus;GO:0051171//regulation of nitrogen compound metabolic process;GO:0097659//nucleic acid-templated transcription;GO:0009734//auxin-activated si…
Gh_D11G2552	95.29	72.78	65.31	91.33	76.68	72.88	60.22	76.2	86.14	109.38	106.23	97.27	72.49	116.61	114.25	82.15	100.29	89.26	1249.62	983.16	769.84	1122.84	1206.71	917.31	846.33	851.17	1031.62	1478.55	1138.5	1230.87	1104.29	1314.34	1171.68	1042.75	1282.62	1061.72	Gh_D11G2552	Gh_D11G2552	Auxin-responsive protein IAA16 [Source:UniProtKB/Swiss-Prot;Acc:O24407]	Environmental Information Processing	Signal transduction	ko04075//Plant hormone signal transduction	GO:0043229//intracellular organelle;GO:0044464//cell part;GO:0005634//nucleus;GO:0043226//organelle;GO:0005622//intracellular;GO:0043227//membrane-bounded organelle;GO:0005623//cell;GO:0044424//intracellular part;GO:0043231//intracellular membrane-bounded organelle	GO:0046983//protein dimerization activity;GO:0001071//nucleic acid binding transcription factor activity;GO:0005488//binding;GO:0005515//protein binding;GO:0003700//sequence-specific DNA binding transcription factor activity	GO:1901362//organic cyclic compound biosynthetic process;GO:0006725//cellular aromatic compound metabolic process;GO:0080090//regulation of primary metabolic process;GO:0007154//cell communication;GO:0031323//regulation of cellular metabolic process;GO:0090304//nucleic acid metabolic process;GO:0071365//cellular response to auxin stimulus;GO:0044238//primary metabolic process;GO:0071495//cellular…
Gh_D11G2553	14.69	12.57	7.88	33.14	12.68	12.66	9.57	15.38	12.61	7.07	7.37	8.98	21.38	16.48	18.51	18.12	28.82	35.77	139	122.53	67	294	144	115	97	124	109	69	57	82	235	134	137	166	266	307	Gh_D11G2553	Gh_D11G2553	Auxin-responsive protein IAA4 [Source:UniProtKB/Swiss-Prot;Acc:P33077]	Environmental Information Processing	Signal transduction	ko04075//Plant hormone signal transduction	GO:0005622//intracellular;GO:0043231//intracellular membrane-bounded organelle;GO:0044424//intracellular part;GO:0044464//cell part;GO:0043226//organelle;GO:0043229//intracellular organelle;GO:0005623//cell;GO:0043227//membrane-bounded organelle;GO:0005634//nucleus	GO:0001071//nucleic acid binding transcription factor activity;GO:0003700//sequence-specific DNA binding transcription factor activity;GO:0044212//transcription regulatory region DNA binding;GO:0005488//binding;GO:0001067//regulatory region nucleic acid binding;GO:1901363//heterocyclic compound binding;GO:0003677//DNA binding;GO:0005515//protein binding;GO:0046983//protein dimerization activity;G…	GO:0010467//gene expression;GO:0044700//single organism signaling;GO:0016070//RNA metabolic process;GO:0006139//nucleobase-containing compound metabolic process;GO:1901362//organic cyclic compound biosynthetic process;GO:0009733//response to auxin;GO:0009059//macromolecule biosynthetic process;GO:0071310//cellular response to organic substance;GO:1901360//organic cyclic compound metabolic process…
Gh_D12G1206	0.12	0	0	0.12	0	0	0.11	0	0.26	0.11	0	0.12	0.4	0.27	0	0.12	0	0	1	0	0	1	0	0	1	0	2	1	0	1	4	2	0	1	0	0	Gh_D12G1206	Gh_D12G1206	Auxin-responsive protein IAA30 [Source:UniProtKB/Swiss-Prot;Acc:Q9M1R4]	Environmental Information Processing	Signal transduction	ko04075//Plant hormone signal transduction	GO:0005623//cell;GO:0043226//organelle;GO:0043229//intracellular organelle;GO:0043231//intracellular membrane-bounded organelle;GO:0044464//cell part;GO:0005622//intracellular;GO:0005634//nucleus;GO:0043227//membrane-bounded organelle;GO:0044424//intracellular part	GO:0046983//protein dimerization activity;GO:0003700//sequence-specific DNA binding transcription factor activity;GO:0005515//protein binding;GO:0001071//nucleic acid binding transcription factor activity;GO:0005488//binding	GO:0010468//regulation of gene expression;GO:0009755//hormone-mediated signaling pathway;GO:0034645//cellular macromolecule biosynthetic process;GO:0044699//single-organism process;GO:0019438//aromatic compound biosynthetic process;GO:0046483//heterocycle metabolic process;GO:0010556//regulation of macromolecule biosynthetic process;GO:0010033//response to organic substance;GO:1901360//organic cy…
Gh_D13G1818	170.25	154.51	137.37	172.2	195.28	186.34	192.81	190.28	200.58	155.33	125.34	144.22	150.68	196.57	189.06	146.57	180.83	163.5	2399	2242.94	1739.88	2274.76	3302	2519.95	2911.51	2283.96	2581.15	2256	1443.42	1961	2466.44	2380.78	2083.32	1999	2485	2089.63	Gh_D13G1818	Gh_D13G1818	Auxin-responsive protein IAA16 [Source:UniProtKB/Swiss-Prot;Acc:O24407]	Environmental Information Processing	Signal transduction	ko04075//Plant hormone signal transduction	GO:0043229//intracellular organelle;GO:0044464//cell part;GO:0005634//nucleus;GO:0043226//organelle;GO:0005622//intracellular;GO:0043227//membrane-bounded organelle;GO:0005623//cell;GO:0044424//intracellular part;GO:0043231//intracellular membrane-bounded organelle	GO:0046983//protein dimerization activity;GO:0001071//nucleic acid binding transcription factor activity;GO:0005488//binding;GO:0005515//protein binding;GO:0003700//sequence-specific DNA binding transcription factor activity	GO:1901362//organic cyclic compound biosynthetic process;GO:0006725//cellular aromatic compound metabolic process;GO:0080090//regulation of primary metabolic process;GO:0007154//cell communication;GO:0031323//regulation of cellular metabolic process;GO:0090304//nucleic acid metabolic process;GO:0071365//cellular response to auxin stimulus;GO:0044238//primary metabolic process;GO:0071495//cellular…
Gh_D13G1819	58.1	52.6	59.38	97.66	56.63	53.61	54.91	79.06	68.98	48.83	43.25	49.33	51.77	43.01	43.77	48.55	70.31	60.99	573.68	535	527	904	671	508	581	665	622	497	349	470	593.8	365	338	464	677	546.21	Gh_D13G1819	Gh_D13G1819	Auxin-responsive protein IAA3 [Source:UniProtKB/Swiss-Prot;Acc:Q38822]	Environmental Information Processing	Signal transduction	ko04075//Plant hormone signal transduction	GO:0005634//nucleus;GO:0005622//intracellular;GO:0044424//intracellular part;GO:0043231//intracellular membrane-bounded organelle;GO:0043229//intracellular organelle;GO:0043226//organelle;GO:0043227//membrane-bounded organelle;GO:0005623//cell;GO:0044464//cell part	GO:0046983//protein dimerization activity;GO:0003700//sequence-specific DNA binding transcription factor activity;GO:0000975//regulatory region DNA binding;GO:1901363//heterocyclic compound binding;GO:0003677//DNA binding;GO:0005515//protein binding;GO:0044212//transcription regulatory region DNA binding;GO:0001071//nucleic acid binding transcription factor activity;GO:0005488//binding;GO:0003676…	GO:0009719//response to endogenous stimulus;GO:1901362//organic cyclic compound biosynthetic process;GO:0034654//nucleobase-containing compound biosynthetic process;GO:0023052//signaling;GO:0044700//single organism signaling;GO:0006351//transcription, DNA-templated;GO:0043170//macromolecule metabolic process;GO:0010468//regulation of gene expression;GO:1903506//regulation of nucleic acid-template…
Gh_D13G2011	0	0	0	0	0	0	0	0	0	0	0	0	0	0	0	0	0	0	0	0	0	0	0	0	0	0	0	0	0	0	0	0	0	0	0	0	Gh_D13G2011	Gh_D13G2011	Auxin-responsive protein IAA26 [Source:UniProtKB/Swiss-Prot;Acc:Q8LAL2]	Environmental Information Processing	Signal transduction	ko04075//Plant hormone signal transduction	GO:0044464//cell part;GO:0043231//intracellular membrane-bounded organelle;GO:0044424//intracellular part;GO:0005634//nucleus;GO:0043226//organelle;GO:0043227//membrane-bounded organelle;GO:0043229//intracellular organelle;GO:0005623//cell;GO:0005622//intracellular	GO:0005488//binding;GO:0003700//sequence-specific DNA binding transcription factor activity;GO:0005515//protein binding;GO:0001071//nucleic acid binding transcription factor activity;GO:0046983//protein dimerization activity	GO:0070887//cellular response to chemical stimulus;GO:1901360//organic cyclic compound metabolic process;GO:0019219//regulation of nucleobase-containing compound metabolic process;GO:0046483//heterocycle metabolic process;GO:0044238//primary metabolic process;GO:0071310//cellular response to organic substance;GO:0006351//transcription, DNA-templated;GO:0009725//response to hormone;GO:0009734//aux…
Gh_Sca006585G01	56.81	60.4	44.47	92.91	95.39	92.79	120.7	165.93	141.72	55.6	55.2	53.97	128.46	109.04	116.18	112.51	146.87	186.64	911.55	998.33	641.31	1397.49	1836.66	1428.95	2075.36	2267.96	2076.58	919.52	723.86	835.6	2394.43	1503.77	1457.82	1747.33	2298.2	2716.08	Gh_Sca006585G01	Gh_Sca006585G01	Auxin-responsive protein IAA7 [Source:UniProtKB/Swiss-Prot;Acc:Q38825]	Environmental Information Processing	Signal transduction	ko04075//Plant hormone signal transduction	GO:0005623//cell;GO:0043227//membrane-bounded organelle;GO:0044424//intracellular part;GO:0044464//cell part;GO:0043226//organelle;GO:0005634//nucleus;GO:0005622//intracellular;GO:0043231//intracellular membrane-bounded organelle;GO:0043229//intracellular organelle	GO:0005488//binding;GO:0001071//nucleic acid binding transcription factor activity;GO:0005515//protein binding;GO:0046983//protein dimerization activity;GO:0003700//sequence-specific DNA binding transcription factor activity	GO:0071310//cellular response to organic substance;GO:0006355//regulation of transcription, DNA-templated;GO:0009628//response to abiotic stimulus;GO:0009734//auxin-activated signaling pathway;GO:0034654//nucleobase-containing compound biosynthetic process;GO:0050794//regulation of cellular process;GO:0009058//biosynthetic process;GO:2001141//regulation of RNA biosynthetic process;GO:0009733//res…
Gh_Sca268049G01	0.61	0	0	0	0	0	0	0	0	0	0	0	0	0	0	0	0	0	1.81	0	0	0	0	0	0	0	0	0	0	0	0	0	0	0	0	0	Gh_Sca268049G01	Gh_Sca268049G01	Auxin-responsive protein IAA30 [Source:UniProtKB/Swiss-Prot;Acc:Q9M1R4]	Environmental Information Processing	Signal transduction	ko04075//Plant hormone signal transduction	GO:0005623//cell;GO:0043226//organelle;GO:0043229//intracellular organelle;GO:0043231//intracellular membrane-bounded organelle;GO:0044464//cell part;GO:0005622//intracellular;GO:0005634//nucleus;GO:0043227//membrane-bounded organelle;GO:0044424//intracellular part	GO:0046983//protein dimerization activity;GO:0003700//sequence-specific DNA binding transcription factor activity;GO:0005515//protein binding;GO:0001071//nucleic acid binding transcription factor activity;GO:0005488//binding	GO:0010468//regulation of gene expression;GO:0009755//hormone-mediated signaling pathway;GO:0034645//cellular macromolecule biosynthetic process;GO:0044699//single-organism process;GO:0019438//aromatic compound biosynthetic process;GO:0046483//heterocycle metabolic process;GO:0010556//regulation of macromolecule biosynthetic process;GO:0010033//response to organic substance;GO:1901360//organic cy…
XLOC_023870	50.15	42.56	43.66	48.24	53.79	44.37	50.6	56.67	58.31	45.23	47.32	48.57	51.77	54.52	59.29	40.58	55.13	64.07	1221.72	1065.13	958.57	1100.58	1565.55	1030.97	1312.4	1179.45	1303.28	1120.56	932.9	1132.06	1462.98	1130.01	1114.24	955.94	1304.36	1414.1	IAA13	XLOC_023870	Auxin-responsive protein IAA13 [Source:UniProtKB/Swiss-Prot;Acc:Q38831]	Environmental Information Processing	Signal transduction	ko04075//Plant hormone signal transduction	GO:0043231//intracellular membrane-bounded organelle;GO:0043227//membrane-bounded organelle;GO:0044464//cell part;GO:0005623//cell;GO:0043229//intracellular organelle;GO:0043226//organelle;GO:0044424//intracellular part;GO:0005622//intracellular;GO:0005634//nucleus	GO:0001071//nucleic acid binding transcription factor activity;GO:0003700//sequence-specific DNA binding transcription factor activity;GO:0005488//binding;GO:0046983//protein dimerization activity;GO:0005515//protein binding	GO:0071495//cellular response to endogenous stimulus;GO:0050794//regulation of cellular process;GO:0009725//response to hormone;GO:0010467//gene expression;GO:0050896//response to stimulus;GO:0044249//cellular biosynthetic process;GO:2001141//regulation of RNA biosynthetic process;GO:0010033//response to organic substance;GO:0006139//nucleobase-containing compound metabolic process;GO:0051252//re…
XLOC_077531	24.09	28.9	21.24	22.74	23.05	34.29	23.56	28.46	25.04	40.86	30.56	34.76	22.68	27.15	35.38	18.41	21.04	25.95	119.77	148	94.91	106	137.53	163.62	125.49	120.52	113.66	209.36	124.14	166.73	131	116	137.53	88.59	102	117	IAA8	XLOC_077531	Auxin-responsive protein IAA8 [Source:UniProtKB/Swiss-Prot;Acc:Q38826]	Environmental Information Processing	Signal transduction	ko04075//Plant hormone signal transduction	GO:0043229//intracellular organelle;GO:0005622//intracellular;GO:0005623//cell;GO:0044464//cell part;GO:0043226//organelle;GO:0043231//intracellular membrane-bounded organelle;GO:0043227//membrane-bounded organelle;GO:0044424//intracellular part;GO:0005634//nucleus	GO:0005515//protein binding;GO:0046983//protein dimerization activity;GO:0005488//binding	GO:2001141//regulation of RNA biosynthetic process;GO:0043170//macromolecule metabolic process;GO:0019219//regulation of nucleobase-containing compound metabolic process;GO:0080090//regulation of primary metabolic process;GO:0044238//primary metabolic process;GO:0044700//single organism signaling;GO:0019222//regulation of metabolic process;GO:0010033//response to organic substance;GO:0019438//aro…
Gh_A08G0390	2.99	3.37	2.95	2.57	2.77	2.17	2.22	3.11	4.31	1.54	1.82	2.3	1.62	1.48	1.46	1.61	2.44	1.72	90.43	104.86	80.07	72.97	100.61	63	72	80	119	48	45	67	57	38.49	34.5	47	72	47.18	Gh_A08G0390	Gh_A08G0390	Protein TRANSPORT INHIBITOR RESPONSE 1 [Source:UniProtKB/Swiss-Prot;Acc:Q570C0]	Environmental Information Processing	Signal transduction	ko04075//Plant hormone signal transduction	GO:0043231//intracellular membrane-bounded organelle;GO:0005622//intracellular;GO:1902494//catalytic complex;GO:0000151//ubiquitin ligase complex;GO:1990234//transferase complex;GO:0044464//cell part;GO:0044424//intracellular part;GO:0043227//membrane-bounded organelle;GO:0043234//protein complex;GO:0043229//intracellular organelle;GO:0032991//macromolecular complex;GO:0005634//nucleus;GO:0005623…	GO:0016740//transferase activity;GO:0042562//hormone binding;GO:0004871//signal transducer activity;GO:0043168//anion binding;GO:0036094//small molecule binding;GO:0005515//protein binding;GO:0038023//signaling receptor activity;GO:0043167//ion binding;GO:0010011//auxin binding;GO:0005488//binding;GO:0019787//ubiquitin-like protein transferase activity;GO:0004872//receptor activity;GO:0038198//au…	GO:0048443//stamen development;GO:0070887//cellular response to chemical stimulus;GO:0044702//single organism reproductive process;GO:0071369//cellular response to ethylene stimulus;GO:0009725//response to hormone;GO:0009755//hormone-mediated signaling pathway;GO:0044707//single-multicellular organism process;GO:0050896//response to stimulus;GO:0048645//organ formation;GO:0071496//cellular respon…
Gh_A08G0662	28.35	21.66	21.12	18.08	23.83	23.03	26.05	24.28	25.23	25.14	25.38	25.66	20.9	25.85	22.63	16.94	18.86	19.51	849.85	669.05	569.15	508.18	857.2	662.76	836.98	620.17	690.7	777.06	621.91	742.32	727.96	666.07	530.66	491.68	551.46	530.44	Gh_A08G0662	Gh_A08G0662	Protein TRANSPORT INHIBITOR RESPONSE 1 [Source:UniProtKB/Swiss-Prot;Acc:Q570C0]	Environmental Information Processing	Signal transduction	ko04075//Plant hormone signal transduction	GO:0043231//intracellular membrane-bounded organelle;GO:0005622//intracellular;GO:1902494//catalytic complex;GO:0000151//ubiquitin ligase complex;GO:1990234//transferase complex;GO:0044464//cell part;GO:0044424//intracellular part;GO:0043227//membrane-bounded organelle;GO:0043234//protein complex;GO:0043229//intracellular organelle;GO:0032991//macromolecular complex;GO:0005634//nucleus;GO:0005623…	GO:0016740//transferase activity;GO:0042562//hormone binding;GO:0004871//signal transducer activity;GO:0043168//anion binding;GO:0036094//small molecule binding;GO:0005515//protein binding;GO:0038023//signaling receptor activity;GO:0043167//ion binding;GO:0010011//auxin binding;GO:0005488//binding;GO:0019787//ubiquitin-like protein transferase activity;GO:0004872//receptor activity;GO:0038198//au…	GO:0048443//stamen development;GO:0070887//cellular response to chemical stimulus;GO:0044702//single organism reproductive process;GO:0071369//cellular response to ethylene stimulus;GO:0009725//response to hormone;GO:0009755//hormone-mediated signaling pathway;GO:0044707//single-multicellular organism process;GO:0050896//response to stimulus;GO:0048645//organ formation;GO:0071496//cellular respon…
Gh_A08G1014	40.07	43.89	33.66	36.14	49.94	50.94	46.25	40.37	41.44	35.65	32.12	35.98	37.77	56.76	54.99	48.63	42.84	47.17	1209.58	1364.99	913.27	1022.79	1809.2	1475.71	1496.17	1038.23	1142.5	1109.15	792.52	1048.13	1324.34	1472.77	1298.18	1420.89	1261.19	1291.57	Gh_A08G1014	Gh_A08G1014	Protein TRANSPORT INHIBITOR RESPONSE 1 [Source:UniProtKB/Swiss-Prot;Acc:Q570C0]	Environmental Information Processing	Signal transduction	ko04075//Plant hormone signal transduction	GO:0043231//intracellular membrane-bounded organelle;GO:0005622//intracellular;GO:1902494//catalytic complex;GO:0000151//ubiquitin ligase complex;GO:1990234//transferase complex;GO:0044464//cell part;GO:0044424//intracellular part;GO:0043227//membrane-bounded organelle;GO:0043234//protein complex;GO:0043229//intracellular organelle;GO:0032991//macromolecular complex;GO:0005634//nucleus;GO:0005623…	GO:0016740//transferase activity;GO:0042562//hormone binding;GO:0004871//signal transducer activity;GO:0043168//anion binding;GO:0036094//small molecule binding;GO:0005515//protein binding;GO:0038023//signaling receptor activity;GO:0043167//ion binding;GO:0010011//auxin binding;GO:0005488//binding;GO:0019787//ubiquitin-like protein transferase activity;GO:0004872//receptor activity;GO:0038198//au…	GO:0048443//stamen development;GO:0070887//cellular response to chemical stimulus;GO:0044702//single organism reproductive process;GO:0071369//cellular response to ethylene stimulus;GO:0009725//response to hormone;GO:0009755//hormone-mediated signaling pathway;GO:0044707//single-multicellular organism process;GO:0050896//response to stimulus;GO:0048645//organ formation;GO:0071496//cellular respon…
Gh_A10G0207	25.61	21.74	18.71	20.28	24.53	19.09	23.06	24.04	23.57	19.1	18.67	20.91	19.14	19.14	14.81	10.67	20.27	15.64	773.22	675.94	507.58	573.88	888.49	553.11	746.07	618.16	649.8	594.22	460.67	609.01	671.13	496.51	349.74	311.88	596.72	428.27	Gh_A10G0207	Gh_A10G0207	Protein TRANSPORT INHIBITOR RESPONSE 1 [Source:UniProtKB/Swiss-Prot;Acc:Q570C0]	Environmental Information Processing	Signal transduction	ko04075//Plant hormone signal transduction	GO:0043231//intracellular membrane-bounded organelle;GO:0005622//intracellular;GO:1902494//catalytic complex;GO:0000151//ubiquitin ligase complex;GO:1990234//transferase complex;GO:0044464//cell part;GO:0044424//intracellular part;GO:0043227//membrane-bounded organelle;GO:0043234//protein complex;GO:0043229//intracellular organelle;GO:0032991//macromolecular complex;GO:0005634//nucleus;GO:0005623…	GO:0016740//transferase activity;GO:0042562//hormone binding;GO:0004871//signal transducer activity;GO:0043168//anion binding;GO:0036094//small molecule binding;GO:0005515//protein binding;GO:0038023//signaling receptor activity;GO:0043167//ion binding;GO:0010011//auxin binding;GO:0005488//binding;GO:0019787//ubiquitin-like protein transferase activity;GO:0004872//receptor activity;GO:0038198//au…	GO:0048443//stamen development;GO:0070887//cellular response to chemical stimulus;GO:0044702//single organism reproductive process;GO:0071369//cellular response to ethylene stimulus;GO:0009725//response to hormone;GO:0009755//hormone-mediated signaling pathway;GO:0044707//single-multicellular organism process;GO:0050896//response to stimulus;GO:0048645//organ formation;GO:0071496//cellular respon…
Gh_A11G1077	16.57	13.49	13.74	13.09	14.04	11.33	10.78	11.48	11.91	19.93	16.19	18.85	12.53	16.93	16.66	10.42	13.46	11.64	499.39	418.74	372.24	369.83	507.57	327.58	348.01	294.64	327.8	619.06	398.64	548.27	438.52	438.51	392.57	304	395.68	318.27	Gh_A11G1077	Gh_A11G1077	Protein TRANSPORT INHIBITOR RESPONSE 1 [Source:UniProtKB/Swiss-Prot;Acc:Q570C0]	Environmental Information Processing	Signal transduction	ko04075//Plant hormone signal transduction	GO:0043231//intracellular membrane-bounded organelle;GO:0005622//intracellular;GO:1902494//catalytic complex;GO:0000151//ubiquitin ligase complex;GO:1990234//transferase complex;GO:0044464//cell part;GO:0044424//intracellular part;GO:0043227//membrane-bounded organelle;GO:0043234//protein complex;GO:0043229//intracellular organelle;GO:0032991//macromolecular complex;GO:0005634//nucleus;GO:0005623…	GO:0016740//transferase activity;GO:0042562//hormone binding;GO:0004871//signal transducer activity;GO:0043168//anion binding;GO:0036094//small molecule binding;GO:0005515//protein binding;GO:0038023//signaling receptor activity;GO:0043167//ion binding;GO:0010011//auxin binding;GO:0005488//binding;GO:0019787//ubiquitin-like protein transferase activity;GO:0004872//receptor activity;GO:0038198//au…	GO:0048443//stamen development;GO:0070887//cellular response to chemical stimulus;GO:0044702//single organism reproductive process;GO:0071369//cellular response to ethylene stimulus;GO:0009725//response to hormone;GO:0009755//hormone-mediated signaling pathway;GO:0044707//single-multicellular organism process;GO:0050896//response to stimulus;GO:0048645//organ formation;GO:0071496//cellular respon…
Gh_D08G0477	2.3	1.93	1.32	1.09	1.75	1.1	1.36	1.63	1.59	1.44	1.9	1.88	1.65	1.56	1.46	1.06	1.12	1.2	69.57	60.14	35.93	31.03	63.39	32	44	42	44	45	47	55	58	40.51	34.5	31	33	32.82	Gh_D08G0477	Gh_D08G0477	Protein TRANSPORT INHIBITOR RESPONSE 1 [Source:UniProtKB/Swiss-Prot;Acc:Q570C0]	Environmental Information Processing	Signal transduction	ko04075//Plant hormone signal transduction	GO:0043231//intracellular membrane-bounded organelle;GO:0005622//intracellular;GO:1902494//catalytic complex;GO:0000151//ubiquitin ligase complex;GO:1990234//transferase complex;GO:0044464//cell part;GO:0044424//intracellular part;GO:0043227//membrane-bounded organelle;GO:0043234//protein complex;GO:0043229//intracellular organelle;GO:0032991//macromolecular complex;GO:0005634//nucleus;GO:0005623…	GO:0016740//transferase activity;GO:0042562//hormone binding;GO:0004871//signal transducer activity;GO:0043168//anion binding;GO:0036094//small molecule binding;GO:0005515//protein binding;GO:0038023//signaling receptor activity;GO:0043167//ion binding;GO:0010011//auxin binding;GO:0005488//binding;GO:0019787//ubiquitin-like protein transferase activity;GO:0004872//receptor activity;GO:0038198//au…	GO:0048443//stamen development;GO:0070887//cellular response to chemical stimulus;GO:0044702//single organism reproductive process;GO:0071369//cellular response to ethylene stimulus;GO:0009725//response to hormone;GO:0009755//hormone-mediated signaling pathway;GO:0044707//single-multicellular organism process;GO:0050896//response to stimulus;GO:0048645//organ formation;GO:0071496//cellular respon…
Gh_D08G0763	24.45	20.74	22.14	15.86	16.89	12.5	12.21	12.52	13.94	26.16	30.08	29.82	23.01	18.92	22.51	9.15	15.2	13.94	738.15	644.95	600.85	448.82	611.8	362.24	395.02	321.83	384.3	813.94	742.09	868.68	807.04	490.93	531.34	267.32	447.54	381.56	Gh_D08G0763	Gh_D08G0763	Protein TRANSPORT INHIBITOR RESPONSE 1 [Source:UniProtKB/Swiss-Prot;Acc:Q570C0]	Environmental Information Processing	Signal transduction	ko04075//Plant hormone signal transduction	GO:0043231//intracellular membrane-bounded organelle;GO:0005622//intracellular;GO:1902494//catalytic complex;GO:0000151//ubiquitin ligase complex;GO:1990234//transferase complex;GO:0044464//cell part;GO:0044424//intracellular part;GO:0043227//membrane-bounded organelle;GO:0043234//protein complex;GO:0043229//intracellular organelle;GO:0032991//macromolecular complex;GO:0005634//nucleus;GO:0005623…	GO:0016740//transferase activity;GO:0042562//hormone binding;GO:0004871//signal transducer activity;GO:0043168//anion binding;GO:0036094//small molecule binding;GO:0005515//protein binding;GO:0038023//signaling receptor activity;GO:0043167//ion binding;GO:0010011//auxin binding;GO:0005488//binding;GO:0019787//ubiquitin-like protein transferase activity;GO:0004872//receptor activity;GO:0038198//au…	GO:0048443//stamen development;GO:0070887//cellular response to chemical stimulus;GO:0044702//single organism reproductive process;GO:0071369//cellular response to ethylene stimulus;GO:0009725//response to hormone;GO:0009755//hormone-mediated signaling pathway;GO:0044707//single-multicellular organism process;GO:0050896//response to stimulus;GO:0048645//organ formation;GO:0071496//cellular respon…
Gh_D08G1288	24.39	23.73	19.01	17.53	25.75	21.93	24.01	21.22	20.77	27.6	24.99	26.08	23.8	29.95	29.64	27.79	22.07	23.35	736.42	738.01	515.73	496.21	932.8	635.29	776.83	545.77	572.5	858.85	616.48	759.87	834.66	777.23	699.82	812.11	649.81	639.43	Gh_D08G1288	Gh_D08G1288	Protein TRANSPORT INHIBITOR RESPONSE 1 [Source:UniProtKB/Swiss-Prot;Acc:Q570C0]	Environmental Information Processing	Signal transduction	ko04075//Plant hormone signal transduction	GO:0043231//intracellular membrane-bounded organelle;GO:0005622//intracellular;GO:1902494//catalytic complex;GO:0000151//ubiquitin ligase complex;GO:1990234//transferase complex;GO:0044464//cell part;GO:0044424//intracellular part;GO:0043227//membrane-bounded organelle;GO:0043234//protein complex;GO:0043229//intracellular organelle;GO:0032991//macromolecular complex;GO:0005634//nucleus;GO:0005623…	GO:0016740//transferase activity;GO:0042562//hormone binding;GO:0004871//signal transducer activity;GO:0043168//anion binding;GO:0036094//small molecule binding;GO:0005515//protein binding;GO:0038023//signaling receptor activity;GO:0043167//ion binding;GO:0010011//auxin binding;GO:0005488//binding;GO:0019787//ubiquitin-like protein transferase activity;GO:0004872//receptor activity;GO:0038198//au…	GO:0048443//stamen development;GO:0070887//cellular response to chemical stimulus;GO:0044702//single organism reproductive process;GO:0071369//cellular response to ethylene stimulus;GO:0009725//response to hormone;GO:0009755//hormone-mediated signaling pathway;GO:0044707//single-multicellular organism process;GO:0050896//response to stimulus;GO:0048645//organ formation;GO:0071496//cellular respon…
Gh_D10G0187	25.5	18.01	19.62	14.77	17.71	15.56	17.8	19.36	16.95	19.89	16.55	16.55	15.08	14.51	17.76	12.56	19.61	14.56	769.78	560.06	532.42	418.12	641.51	450.89	575.93	497.84	467.2	618.78	408.33	481.99	528.87	376.49	419.26	367.12	577.28	398.73	Gh_D10G0187	Gh_D10G0187	Protein TRANSPORT INHIBITOR RESPONSE 1 [Source:UniProtKB/Swiss-Prot;Acc:Q570C0]	Environmental Information Processing	Signal transduction	ko04075//Plant hormone signal transduction	GO:0043231//intracellular membrane-bounded organelle;GO:0005622//intracellular;GO:1902494//catalytic complex;GO:0000151//ubiquitin ligase complex;GO:1990234//transferase complex;GO:0044464//cell part;GO:0044424//intracellular part;GO:0043227//membrane-bounded organelle;GO:0043234//protein complex;GO:0043229//intracellular organelle;GO:0032991//macromolecular complex;GO:0005634//nucleus;GO:0005623…	GO:0016740//transferase activity;GO:0042562//hormone binding;GO:0004871//signal transducer activity;GO:0043168//anion binding;GO:0036094//small molecule binding;GO:0005515//protein binding;GO:0038023//signaling receptor activity;GO:0043167//ion binding;GO:0010011//auxin binding;GO:0005488//binding;GO:0019787//ubiquitin-like protein transferase activity;GO:0004872//receptor activity;GO:0038198//au…	GO:0048443//stamen development;GO:0070887//cellular response to chemical stimulus;GO:0044702//single organism reproductive process;GO:0071369//cellular response to ethylene stimulus;GO:0009725//response to hormone;GO:0009755//hormone-mediated signaling pathway;GO:0044707//single-multicellular organism process;GO:0050896//response to stimulus;GO:0048645//organ formation;GO:0071496//cellular respon…
Gh_D11G1228	11.2	10.54	9.04	8.57	9.41	5.82	7.15	7.53	7.06	14.68	12.89	15.09	11.61	11.68	12.62	7.92	10.73	8.92	337.61	327.26	244.76	242.17	340.43	168.42	230.99	193.36	194.2	455.94	317.36	438.73	406.48	302.49	297.43	231	315.32	243.73	Gh_D11G1228	Gh_D11G1228	Protein TRANSPORT INHIBITOR RESPONSE 1 [Source:UniProtKB/Swiss-Prot;Acc:Q570C0]	Environmental Information Processing	Signal transduction	ko04075//Plant hormone signal transduction	GO:0043231//intracellular membrane-bounded organelle;GO:0005622//intracellular;GO:1902494//catalytic complex;GO:0000151//ubiquitin ligase complex;GO:1990234//transferase complex;GO:0044464//cell part;GO:0044424//intracellular part;GO:0043227//membrane-bounded organelle;GO:0043234//protein complex;GO:0043229//intracellular organelle;GO:0032991//macromolecular complex;GO:0005634//nucleus;GO:0005623…	GO:0016740//transferase activity;GO:0042562//hormone binding;GO:0004871//signal transducer activity;GO:0043168//anion binding;GO:0036094//small molecule binding;GO:0005515//protein binding;GO:0038023//signaling receptor activity;GO:0043167//ion binding;GO:0010011//auxin binding;GO:0005488//binding;GO:0019787//ubiquitin-like protein transferase activity;GO:0004872//receptor activity;GO:0038198//au…	GO:0048443//stamen development;GO:0070887//cellular response to chemical stimulus;GO:0044702//single organism reproductive process;GO:0071369//cellular response to ethylene stimulus;GO:0009725//response to hormone;GO:0009755//hormone-mediated signaling pathway;GO:0044707//single-multicellular organism process;GO:0050896//response to stimulus;GO:0048645//organ formation;GO:0071496//cellular respon…
Gh_A01G0908	3.85	4	3.87	3.01	2.93	2.42	2.15	2.45	1.99	1.9	2.04	2.38	1.71	1.01	1	1.47	0.68	1.09	187.73	200.75	169.34	137.41	171.51	113.22	112.15	101.44	88.5	95.62	81.29	111.89	96.71	42.28	38.09	69.46	32.24	48	Gh_A01G0908	Gh_A01G0908	Auxin response factor 5 [Source:UniProtKB/Swiss-Prot;Acc:P93024]	Environmental Information Processing	Signal transduction	ko04075//Plant hormone signal transduction	GO:0044464//cell part;GO:0005623//cell;GO:0043231//intracellular membrane-bounded organelle;GO:0043226//organelle;GO:0044424//intracellular part;GO:0043229//intracellular organelle;GO:0005634//nucleus;GO:0005622//intracellular;GO:0043227//membrane-bounded organelle;GO:0016020//membrane	GO:0003676//nucleic acid binding;GO:0042802//identical protein binding;GO:0005515//protein binding;GO:0001067//regulatory region nucleic acid binding;GO:0003677//DNA binding;GO:0003700//sequence-specific DNA binding transcription factor activity;GO:0001071//nucleic acid binding transcription factor activity;GO:1901363//heterocyclic compound binding;GO:0044212//transcription regulatory region DNA …	GO:0061458//reproductive system development;GO:0044707//single-multicellular organism process;GO:0050789//regulation of biological process;GO:0032502//developmental process;GO:0010467//gene expression;GO:0050896//response to stimulus;GO:0007389//pattern specification process;GO:1901576//organic substance biosynthetic process;GO:0032774//RNA biosynthetic process;GO:1903506//regulation of nucleic a…
Gh_A05G0264	13.15	8.57	10.72	11.95	11.58	12.93	18.96	18.74	17.77	10.47	9.82	9.59	13.65	8.76	10.04	10.97	14.32	12.16	747.91	502.03	548.27	637.36	790.26	706.07	1155.97	907.81	923.08	613.61	456.3	526.41	902.06	428.31	446.59	603.68	794.51	627.5	Gh_A05G0264	Gh_A05G0264	Auxin response factor 7 [Source:UniProtKB/Swiss-Prot;Acc:P93022]	Environmental Information Processing	Signal transduction	ko04075//Plant hormone signal transduction	GO:0005622//intracellular;GO:0043226//organelle;GO:0044424//intracellular part;GO:0043231//intracellular membrane-bounded organelle;GO:0005623//cell;GO:0005634//nucleus;GO:0043229//intracellular organelle;GO:0044464//cell part;GO:0043227//membrane-bounded organelle	GO:0001071//nucleic acid binding transcription factor activity;GO:0005515//protein binding;GO:0003677//DNA binding;GO:0097159//organic cyclic compound binding;GO:0003700//sequence-specific DNA binding transcription factor activity;GO:0005488//binding;GO:1901363//heterocyclic compound binding;GO:0046983//protein dimerization activity;GO:0003676//nucleic acid binding	GO:0044238//primary metabolic process;GO:0006725//cellular aromatic compound metabolic process;GO:0010015//root morphogenesis;GO:0016070//RNA metabolic process;GO:0032870//cellular response to hormone stimulus;GO:0070887//cellular response to chemical stimulus;GO:0009891//positive regulation of biosynthetic process;GO:0018130//heterocycle biosynthetic process;GO:0048569//post-embryonic organ deve…
Gh_A05G1337	18.76	20.3	19.63	16.42	15.24	12.87	19.12	19.89	16.78	11.88	12.24	14.37	10	8	8.35	9.53	8.86	8.92	719.61	802.13	676.8	590.45	701.78	473.74	786.16	649.91	588.05	469.59	383.83	531.91	445.68	263.94	250.39	353.78	331.62	310.52	Gh_A05G1337	Gh_A05G1337	Auxin response factor 3 [Source:UniProtKB/Swiss-Prot;Acc:O23661]	Environmental Information Processing	Signal transduction	ko04075//Plant hormone signal transduction	GO:0043231//intracellular membrane-bounded organelle;GO:0005623//cell;GO:0005622//intracellular;GO:0043227//membrane-bounded organelle;GO:0044424//intracellular part;GO:0044464//cell part;GO:0043229//intracellular organelle;GO:0005634//nucleus;GO:0043226//organelle	GO:1901363//heterocyclic compound binding;GO:0003677//DNA binding;GO:0097159//organic cyclic compound binding;GO:0005488//binding;GO:0003676//nucleic acid binding;GO:0001071//nucleic acid binding transcription factor activity;GO:0003700//sequence-specific DNA binding transcription factor activity	GO:0051716//cellular response to stimulus;GO:0044767//single-organism developmental process;GO:0032502//developmental process;GO:0045165//cell fate commitment;GO:0010468//regulation of gene expression;GO:0042445//hormone metabolic process;GO:0090567//reproductive shoot system development;GO:0034654//nucleobase-containing compound biosynthetic process;GO:0051252//regulation of RNA metabolic proces…
Gh_A05G1607	1.13	0.65	0.89	0.35	0.39	0.43	0.67	0.38	0.54	0.4	0.38	0.57	0.12	0.12	0.16	0.13	0.17	0.09	55.25	32.66	39.23	16	22.84	20	35	16	24	20.21	15	27	7	5	6	6.3	8	4	Gh_A05G1607	Gh_A05G1607	Auxin response factor 5 [Source:UniProtKB/Swiss-Prot;Acc:P93024]	Environmental Information Processing	Signal transduction	ko04075//Plant hormone signal transduction	GO:0044464//cell part;GO:0005623//cell;GO:0043231//intracellular membrane-bounded organelle;GO:0043226//organelle;GO:0044424//intracellular part;GO:0043229//intracellular organelle;GO:0005634//nucleus;GO:0005622//intracellular;GO:0043227//membrane-bounded organelle;GO:0016020//membrane	GO:0003676//nucleic acid binding;GO:0042802//identical protein binding;GO:0005515//protein binding;GO:0001067//regulatory region nucleic acid binding;GO:0003677//DNA binding;GO:0003700//sequence-specific DNA binding transcription factor activity;GO:0001071//nucleic acid binding transcription factor activity;GO:1901363//heterocyclic compound binding;GO:0044212//transcription regulatory region DNA …	GO:0061458//reproductive system development;GO:0044707//single-multicellular organism process;GO:0050789//regulation of biological process;GO:0032502//developmental process;GO:0010467//gene expression;GO:0050896//response to stimulus;GO:0007389//pattern specification process;GO:1901576//organic substance biosynthetic process;GO:0032774//RNA biosynthetic process;GO:1903506//regulation of nucleic a…
Gh_A06G2038	5.27	3.64	4.4	3.22	4.39	3.21	3.6	2.64	3.54	4.39	3.7	4.49	2.67	3.66	3.44	3.44	2.99	2.6	126.55	90	95.01	72.47	126.59	74	92.62	54	77.55	108.64	72.6	103.95	74.55	75.57	64.66	80	70	56.71	Gh_A06G2038	Gh_A06G2038	Auxin response factor 3 [Source:UniProtKB/Swiss-Prot;Acc:O23661]	Environmental Information Processing	Signal transduction	ko04075//Plant hormone signal transduction	GO:0043231//intracellular membrane-bounded organelle;GO:0005623//cell;GO:0005622//intracellular;GO:0043227//membrane-bounded organelle;GO:0044424//intracellular part;GO:0044464//cell part;GO:0043229//intracellular organelle;GO:0005634//nucleus;GO:0043226//organelle	GO:1901363//heterocyclic compound binding;GO:0003677//DNA binding;GO:0097159//organic cyclic compound binding;GO:0005488//binding;GO:0003676//nucleic acid binding;GO:0001071//nucleic acid binding transcription factor activity;GO:0003700//sequence-specific DNA binding transcription factor activity	GO:0051716//cellular response to stimulus;GO:0044767//single-organism developmental process;GO:0032502//developmental process;GO:0045165//cell fate commitment;GO:0010468//regulation of gene expression;GO:0042445//hormone metabolic process;GO:0090567//reproductive shoot system development;GO:0034654//nucleobase-containing compound biosynthetic process;GO:0051252//regulation of RNA metabolic proces…
Gh_A10G0266	27.88	19.71	26.97	15.49	18.27	12.66	12.25	14.07	12.76	30.08	28.16	28.05	19.3	16.72	18.21	14.01	14.23	10.83	985.14	717.42	856.44	512.88	774.59	429.26	463.75	423.39	411.8	1095.42	813.17	956.46	792.28	507.62	503.24	479.18	490.15	346.95	Gh_A10G0266	Gh_A10G0266	Auxin response factor 3 [Source:UniProtKB/Swiss-Prot;Acc:O23661]	Environmental Information Processing	Signal transduction	ko04075//Plant hormone signal transduction	GO:0043231//intracellular membrane-bounded organelle;GO:0005623//cell;GO:0005622//intracellular;GO:0043227//membrane-bounded organelle;GO:0044424//intracellular part;GO:0044464//cell part;GO:0043229//intracellular organelle;GO:0005634//nucleus;GO:0043226//organelle	GO:1901363//heterocyclic compound binding;GO:0003677//DNA binding;GO:0097159//organic cyclic compound binding;GO:0005488//binding;GO:0003676//nucleic acid binding;GO:0001071//nucleic acid binding transcription factor activity;GO:0003700//sequence-specific DNA binding transcription factor activity	GO:0051716//cellular response to stimulus;GO:0044767//single-organism developmental process;GO:0032502//developmental process;GO:0045165//cell fate commitment;GO:0010468//regulation of gene expression;GO:0042445//hormone metabolic process;GO:0090567//reproductive shoot system development;GO:0034654//nucleobase-containing compound biosynthetic process;GO:0051252//regulation of RNA metabolic proces…
Gh_A10G1402	18.97	15.83	19.1	15.06	15.21	13.67	14.36	15.27	14.94	17.68	17.62	18.13	14.31	13.46	12.04	13.11	11.62	9.82	713.94	613.92	646.25	531.45	687.17	493.74	579.17	489.7	513.58	685.94	541.94	658.53	625.79	435.61	354.42	477.56	426.56	335.24	Gh_A10G1402	Gh_A10G1402	Auxin response factor 1 [Source:UniProtKB/Swiss-Prot;Acc:Q8L7G0]	Environmental Information Processing	Signal transduction	ko04075//Plant hormone signal transduction	GO:0043229//intracellular organelle;GO:0005622//intracellular;GO:0044424//intracellular part;GO:0043226//organelle;GO:0043227//membrane-bounded organelle;GO:0005623//cell;GO:0044464//cell part;GO:0005634//nucleus;GO:0043231//intracellular membrane-bounded organelle	GO:0003676//nucleic acid binding;GO:1901363//heterocyclic compound binding;GO:0003677//DNA binding;GO:0003700//sequence-specific DNA binding transcription factor activity;GO:0046983//protein dimerization activity;GO:0097159//organic cyclic compound binding;GO:0005515//protein binding;GO:0001071//nucleic acid binding transcription factor activity;GO:0042802//identical protein binding;GO:0005488//b…	GO:0044238//primary metabolic process;GO:0051716//cellular response to stimulus;GO:0007165//signal transduction;GO:0031326//regulation of cellular biosynthetic process;GO:0048367//shoot system development;GO:2001141//regulation of RNA biosynthetic process;GO:0009719//response to endogenous stimulus;GO:0031327//negative regulation of cellular biosynthetic process;GO:0044763//single-organism cellul…
Gh_A11G1082	3.77	2.49	1.07	2.14	2.43	2.58	1.03	0.94	0.78	0.61	0.61	0.83	0.12	0.26	0.11	0.23	0.59	0.06	136.84	93	35	73	106	90	40	29	26	23	18	29	5	8	3	8	21	2	Gh_A11G1082	Gh_A11G1082	Auxin response factor 1 [Source:UniProtKB/Swiss-Prot;Acc:Q8L7G0]	Environmental Information Processing	Signal transduction	ko04075//Plant hormone signal transduction	GO:0043229//intracellular organelle;GO:0005622//intracellular;GO:0044424//intracellular part;GO:0043226//organelle;GO:0043227//membrane-bounded organelle;GO:0005623//cell;GO:0044464//cell part;GO:0005634//nucleus;GO:0043231//intracellular membrane-bounded organelle	GO:0003676//nucleic acid binding;GO:1901363//heterocyclic compound binding;GO:0003677//DNA binding;GO:0003700//sequence-specific DNA binding transcription factor activity;GO:0046983//protein dimerization activity;GO:0097159//organic cyclic compound binding;GO:0005515//protein binding;GO:0001071//nucleic acid binding transcription factor activity;GO:0042802//identical protein binding;GO:0005488//b…	GO:0044238//primary metabolic process;GO:0051716//cellular response to stimulus;GO:0007165//signal transduction;GO:0031326//regulation of cellular biosynthetic process;GO:0048367//shoot system development;GO:2001141//regulation of RNA biosynthetic process;GO:0009719//response to endogenous stimulus;GO:0031327//negative regulation of cellular biosynthetic process;GO:0044763//single-organism cellul…
Gh_D01G0951	3.5	3.25	4.31	2.55	2.8	2.33	1.76	2.11	2.35	2.22	2.18	2.75	1.49	1.36	1.39	1.52	0.92	1.09	170.27	163.25	188.66	116.59	163.49	108.78	91.85	87.56	104.5	111.38	86.71	129.11	84.29	56.72	52.91	71.54	43.76	48	Gh_D01G0951	Gh_D01G0951	Auxin response factor 5 [Source:UniProtKB/Swiss-Prot;Acc:P93024]	Environmental Information Processing	Signal transduction	ko04075//Plant hormone signal transduction	GO:0044464//cell part;GO:0005623//cell;GO:0043231//intracellular membrane-bounded organelle;GO:0043226//organelle;GO:0044424//intracellular part;GO:0043229//intracellular organelle;GO:0005634//nucleus;GO:0005622//intracellular;GO:0043227//membrane-bounded organelle;GO:0016020//membrane	GO:0003676//nucleic acid binding;GO:0042802//identical protein binding;GO:0005515//protein binding;GO:0001067//regulatory region nucleic acid binding;GO:0003677//DNA binding;GO:0003700//sequence-specific DNA binding transcription factor activity;GO:0001071//nucleic acid binding transcription factor activity;GO:1901363//heterocyclic compound binding;GO:0044212//transcription regulatory region DNA …	GO:0061458//reproductive system development;GO:0044707//single-multicellular organism process;GO:0050789//regulation of biological process;GO:0032502//developmental process;GO:0010467//gene expression;GO:0050896//response to stimulus;GO:0007389//pattern specification process;GO:1901576//organic substance biosynthetic process;GO:0032774//RNA biosynthetic process;GO:1903506//regulation of nucleic a…
Gh_D05G1506	18.78	17.55	16.75	15.82	13.88	14.96	21.75	20.34	19.66	14.39	13.85	15.03	11.91	9.91	11.75	11.56	13.73	11.02	718.39	691.81	576.2	567.55	637.22	549.26	891.84	663.09	686.95	567.41	433.17	555.09	529.32	326.06	351.61	428.22	512.37	382.48	Gh_D05G1506	Gh_D05G1506	Auxin response factor 3 [Source:UniProtKB/Swiss-Prot;Acc:O23661]	Environmental Information Processing	Signal transduction	ko04075//Plant hormone signal transduction	GO:0043231//intracellular membrane-bounded organelle;GO:0005623//cell;GO:0005622//intracellular;GO:0043227//membrane-bounded organelle;GO:0044424//intracellular part;GO:0044464//cell part;GO:0043229//intracellular organelle;GO:0005634//nucleus;GO:0043226//organelle	GO:1901363//heterocyclic compound binding;GO:0003677//DNA binding;GO:0097159//organic cyclic compound binding;GO:0005488//binding;GO:0003676//nucleic acid binding;GO:0001071//nucleic acid binding transcription factor activity;GO:0003700//sequence-specific DNA binding transcription factor activity	GO:0051716//cellular response to stimulus;GO:0044767//single-organism developmental process;GO:0032502//developmental process;GO:0045165//cell fate commitment;GO:0010468//regulation of gene expression;GO:0042445//hormone metabolic process;GO:0090567//reproductive shoot system development;GO:0034654//nucleobase-containing compound biosynthetic process;GO:0051252//regulation of RNA metabolic proces…
Gh_D05G1792	0.99	0.54	0.56	0.28	0.29	0.61	0.46	0.4	0.43	0.22	0.51	0.49	0.13	0.22	0.19	0.19	0.14	0.17	52.75	29.34	26.77	14	18.16	31	26	18	21	11.79	22	25	8	10	8	9.7	7	8	Gh_D05G1792	Gh_D05G1792	Auxin response factor 5 [Source:UniProtKB/Swiss-Prot;Acc:P93024]	Environmental Information Processing	Signal transduction	ko04075//Plant hormone signal transduction	GO:0044464//cell part;GO:0005623//cell;GO:0043231//intracellular membrane-bounded organelle;GO:0043226//organelle;GO:0044424//intracellular part;GO:0043229//intracellular organelle;GO:0005634//nucleus;GO:0005622//intracellular;GO:0043227//membrane-bounded organelle;GO:0016020//membrane	GO:0003676//nucleic acid binding;GO:0042802//identical protein binding;GO:0005515//protein binding;GO:0001067//regulatory region nucleic acid binding;GO:0003677//DNA binding;GO:0003700//sequence-specific DNA binding transcription factor activity;GO:0001071//nucleic acid binding transcription factor activity;GO:1901363//heterocyclic compound binding;GO:0044212//transcription regulatory region DNA …	GO:0061458//reproductive system development;GO:0044707//single-multicellular organism process;GO:0050789//regulation of biological process;GO:0032502//developmental process;GO:0010467//gene expression;GO:0050896//response to stimulus;GO:0007389//pattern specification process;GO:1901576//organic substance biosynthetic process;GO:0032774//RNA biosynthetic process;GO:1903506//regulation of nucleic a…
Gh_D06G1415	4.49	6.03	6.44	5.21	3.22	3.85	2.31	2.31	2.97	2.65	3.41	3.69	2.29	2.97	1.89	4.06	1.96	1.6	171.45	237	220.99	186.53	147.41	141	94.38	75	103.45	104.36	106.4	136.05	101.45	97.43	56.34	150	73	55.29	Gh_D06G1415	Gh_D06G1415	Auxin response factor 3 [Source:UniProtKB/Swiss-Prot;Acc:O23661]	Environmental Information Processing	Signal transduction	ko04075//Plant hormone signal transduction	GO:0043231//intracellular membrane-bounded organelle;GO:0005623//cell;GO:0005622//intracellular;GO:0043227//membrane-bounded organelle;GO:0044424//intracellular part;GO:0044464//cell part;GO:0043229//intracellular organelle;GO:0005634//nucleus;GO:0043226//organelle	GO:1901363//heterocyclic compound binding;GO:0003677//DNA binding;GO:0097159//organic cyclic compound binding;GO:0005488//binding;GO:0003676//nucleic acid binding;GO:0001071//nucleic acid binding transcription factor activity;GO:0003700//sequence-specific DNA binding transcription factor activity	GO:0051716//cellular response to stimulus;GO:0044767//single-organism developmental process;GO:0032502//developmental process;GO:0045165//cell fate commitment;GO:0010468//regulation of gene expression;GO:0042445//hormone metabolic process;GO:0090567//reproductive shoot system development;GO:0034654//nucleobase-containing compound biosynthetic process;GO:0051252//regulation of RNA metabolic proces…
Gh_D07G0132	39.31	35.85	34.14	29.01	34.44	35	39.84	39.7	38.55	26.96	24.1	26.95	24.29	19.88	19.76	18.54	26.63	22.59	2173.28	2041.66	1696.52	1503.51	2285.06	1856.82	2360.5	1869.39	1946.25	1536.11	1088.86	1437.84	1560.12	944.75	854.3	991.84	1435.49	1132.46	Gh_D07G0132	Gh_D07G0132	Auxin response factor 7 [Source:UniProtKB/Swiss-Prot;Acc:P93022]	Environmental Information Processing	Signal transduction	ko04075//Plant hormone signal transduction	GO:0005622//intracellular;GO:0043226//organelle;GO:0044424//intracellular part;GO:0043231//intracellular membrane-bounded organelle;GO:0005623//cell;GO:0005634//nucleus;GO:0043229//intracellular organelle;GO:0044464//cell part;GO:0043227//membrane-bounded organelle	GO:0001071//nucleic acid binding transcription factor activity;GO:0005515//protein binding;GO:0003677//DNA binding;GO:0097159//organic cyclic compound binding;GO:0003700//sequence-specific DNA binding transcription factor activity;GO:0005488//binding;GO:1901363//heterocyclic compound binding;GO:0046983//protein dimerization activity;GO:0003676//nucleic acid binding	GO:0044238//primary metabolic process;GO:0006725//cellular aromatic compound metabolic process;GO:0010015//root morphogenesis;GO:0016070//RNA metabolic process;GO:0032870//cellular response to hormone stimulus;GO:0070887//cellular response to chemical stimulus;GO:0009891//positive regulation of biosynthetic process;GO:0018130//heterocycle biosynthetic process;GO:0048569//post-embryonic organ deve…
Gh_D10G0266	38.15	31.11	34.18	20.81	28.84	23.34	21.79	22.95	21.45	43.55	39.33	42.01	30.7	26.74	26.95	25.33	25.9	19.64	1351.86	1135.58	1088.56	691.12	1226.41	793.74	827.25	692.61	694.2	1590.58	1138.83	1436.54	1263.72	814.38	746.76	868.82	894.85	631.05	Gh_D10G0266	Gh_D10G0266	Auxin response factor 3 [Source:UniProtKB/Swiss-Prot;Acc:O23661]	Environmental Information Processing	Signal transduction	ko04075//Plant hormone signal transduction	GO:0043231//intracellular membrane-bounded organelle;GO:0005623//cell;GO:0005622//intracellular;GO:0043227//membrane-bounded organelle;GO:0044424//intracellular part;GO:0044464//cell part;GO:0043229//intracellular organelle;GO:0005634//nucleus;GO:0043226//organelle	GO:1901363//heterocyclic compound binding;GO:0003677//DNA binding;GO:0097159//organic cyclic compound binding;GO:0005488//binding;GO:0003676//nucleic acid binding;GO:0001071//nucleic acid binding transcription factor activity;GO:0003700//sequence-specific DNA binding transcription factor activity	GO:0051716//cellular response to stimulus;GO:0044767//single-organism developmental process;GO:0032502//developmental process;GO:0045165//cell fate commitment;GO:0010468//regulation of gene expression;GO:0042445//hormone metabolic process;GO:0090567//reproductive shoot system development;GO:0034654//nucleobase-containing compound biosynthetic process;GO:0051252//regulation of RNA metabolic proces…
Gh_D10G0803	20.33	17.81	18.28	16.46	15.56	14.02	14.71	16.58	16.04	17.77	17.61	18.65	16.34	13.03	13.16	13.23	14.46	13.42	736.06	664.08	594.75	558.55	675.83	487.26	570.83	511.3	530.42	663.06	521.06	651.47	687.21	405.39	372.58	463.44	510.44	440.76	Gh_D10G0803	Gh_D10G0803	Auxin response factor 1 [Source:UniProtKB/Swiss-Prot;Acc:Q8L7G0]	Environmental Information Processing	Signal transduction	ko04075//Plant hormone signal transduction	GO:0043229//intracellular organelle;GO:0005622//intracellular;GO:0044424//intracellular part;GO:0043226//organelle;GO:0043227//membrane-bounded organelle;GO:0005623//cell;GO:0044464//cell part;GO:0005634//nucleus;GO:0043231//intracellular membrane-bounded organelle	GO:0003676//nucleic acid binding;GO:1901363//heterocyclic compound binding;GO:0003677//DNA binding;GO:0003700//sequence-specific DNA binding transcription factor activity;GO:0046983//protein dimerization activity;GO:0097159//organic cyclic compound binding;GO:0005515//protein binding;GO:0001071//nucleic acid binding transcription factor activity;GO:0042802//identical protein binding;GO:0005488//b…	GO:0044238//primary metabolic process;GO:0051716//cellular response to stimulus;GO:0007165//signal transduction;GO:0031326//regulation of cellular biosynthetic process;GO:0048367//shoot system development;GO:2001141//regulation of RNA biosynthetic process;GO:0009719//response to endogenous stimulus;GO:0031327//negative regulation of cellular biosynthetic process;GO:0044763//single-organism cellul…
Gh_D11G1233	0.7	0.93	0.29	0.28	0.39	0.49	0.52	0.21	0.25	0.08	0.07	0.12	0.03	0	0.04	0	0.03	0	24.16	33	9	9	16	16	19	6	8	3	2	4	1	0	1	0	1	0	Gh_D11G1233	Gh_D11G1233	Auxin response factor 1 [Source:UniProtKB/Swiss-Prot;Acc:Q8L7G0]	Environmental Information Processing	Signal transduction	ko04075//Plant hormone signal transduction	GO:0043229//intracellular organelle;GO:0005622//intracellular;GO:0044424//intracellular part;GO:0043226//organelle;GO:0043227//membrane-bounded organelle;GO:0005623//cell;GO:0044464//cell part;GO:0005634//nucleus;GO:0043231//intracellular membrane-bounded organelle	GO:0003676//nucleic acid binding;GO:1901363//heterocyclic compound binding;GO:0003677//DNA binding;GO:0003700//sequence-specific DNA binding transcription factor activity;GO:0046983//protein dimerization activity;GO:0097159//organic cyclic compound binding;GO:0005515//protein binding;GO:0001071//nucleic acid binding transcription factor activity;GO:0042802//identical protein binding;GO:0005488//b…	GO:0044238//primary metabolic process;GO:0051716//cellular response to stimulus;GO:0007165//signal transduction;GO:0031326//regulation of cellular biosynthetic process;GO:0048367//shoot system development;GO:2001141//regulation of RNA biosynthetic process;GO:0009719//response to endogenous stimulus;GO:0031327//negative regulation of cellular biosynthetic process;GO:0044763//single-organism cellul…
Gh_Sca124845G01	0	0	0	0	0	0	0	0	0	0	0	0	0	0	0	0	0	0	0	0	0	0	0	0	0	0	0	0	0	0	0	0	0	0	0	0	Gh_Sca124845G01	Gh_Sca124845G01	Auxin response factor 5 [Source:UniProtKB/Swiss-Prot;Acc:P93024]	Environmental Information Processing	Signal transduction	ko04075//Plant hormone signal transduction	GO:0044464//cell part;GO:0005623//cell;GO:0043231//intracellular membrane-bounded organelle;GO:0043226//organelle;GO:0044424//intracellular part;GO:0043229//intracellular organelle;GO:0005634//nucleus;GO:0005622//intracellular;GO:0043227//membrane-bounded organelle;GO:0016020//membrane	GO:0003676//nucleic acid binding;GO:0042802//identical protein binding;GO:0005515//protein binding;GO:0001067//regulatory region nucleic acid binding;GO:0003677//DNA binding;GO:0003700//sequence-specific DNA binding transcription factor activity;GO:0001071//nucleic acid binding transcription factor activity;GO:1901363//heterocyclic compound binding;GO:0044212//transcription regulatory region DNA …	GO:0061458//reproductive system development;GO:0044707//single-multicellular organism process;GO:0050789//regulation of biological process;GO:0032502//developmental process;GO:0010467//gene expression;GO:0050896//response to stimulus;GO:0007389//pattern specification process;GO:1901576//organic substance biosynthetic process;GO:0032774//RNA biosynthetic process;GO:1903506//regulation of nucleic a…
[truncated: 712 more rows]
